# Supplementary material for: Cationic ligands between σ-donation and hydrogen-bridge-bond-stabilisation of ancillary ligands in coinage metal complexes with protonated carbodiphosphoranes
Source: Royal Society of Chemistry journal article supplement (doi:10.1039/d2dt02338e), 2022-01-01
Supplement: d2dt02338e1.pdf [file d2dt02338e1.pdf]

## *Supporting Information*

### Cationic ligands between $\sigma$ -donation and hydrogen-bridge-bond-stabilisation of ancillary ligands in coinage metal complexes with protonated carbodiphosphanes

Leon Maser,<sup>a,b</sup> Matthias Vogt and Robert Langer<sup>a,b,\*</sup>

<sup>a</sup> *Institute of Chemistry, Faculty of Natural Sciences II, Martin-Luther-Universität Halle- Wittenberg, Kurt-Mothes-Str. 2, D-06120 Halle (Saale), Germany. Fax: +49 (0)345 5527028; Tel: +49 (0)345 5525620; E-mail: [robert.langer@chemie.uni-halle.de](mailto:robert.langer@chemie.uni-halle.de)*

<sup>b</sup> *Department of Chemistry, Philipps-Universität Marburg, Hans-Meerwein-Str. 4, 35043 Marburg, Germany.*

# Contents

|      |                                                                                                                 |        |
|------|-----------------------------------------------------------------------------------------------------------------|--------|
| 1    | Experimental Procedures.....                                                                                    | - 3 -  |
| 1.1  | Materials and Methods.....                                                                                      | - 3 -  |
| 1.1  | Synthesis of $[(\text{dppm})_2\text{CH}]\text{CuCl}(\text{PF}_6)$ (2-Cl).....                                   | - 3 -  |
| 1.2  | Synthesis of $[(\text{dppm})_2\text{CH}]\text{CuBr}(\text{PF}_6)$ (2-Br).....                                   | - 4 -  |
| 1.3  | Synthesis of $[(\text{dppm})_2\text{CH}]\text{CuI}(\text{PF}_6)$ (2-I).....                                     | - 4 -  |
| 1.4  | Synthesis of $[(\text{dppm})_2\text{CH}]\text{Cu}(\text{NCMe})(\text{PF}_6)(\text{BF}_4)$ (2-NCMe).....         | - 5 -  |
| 1.5  | Synthesis of $[(\text{dppm})_2\text{CH}]\text{Ag}(\text{PF}_6)_2$ (3).....                                      | - 5 -  |
| 1.6  | Synthesis of $[(\text{dppm})_2\text{CH}]\text{AgCl}(\text{NO}_3)$ (3-Cl).....                                   | - 5 -  |
| 1.7  | Synthesis of $[(\text{dppm})_2\text{CH}]\text{AgBr}(\text{PF}_6)$ (3-Br).....                                   | - 6 -  |
| 1.8  | Synthesis of $[(\text{dppm})_2\text{CH}]\text{AgI}(\text{PF}_6)$ (3-I).....                                     | - 6 -  |
| 1.9  | Synthesis of $[(\text{dppm})_2\text{CH}]\text{Ag}(\text{NCMe})(\text{PF}_6)_2$ (3-NCMe).....                    | - 7 -  |
| 1.10 | Synthesis of $[(\text{dppm})_2\text{CH}]\text{Ag}(\text{H}_2\text{O})(\text{PF}_6)_2$ (3-H <sub>2</sub> O)..... | - 7 -  |
| 1.11 | Synthesis of $[(\text{dppm})_2\text{CH}]\text{Ag}(\text{NO}_3)(\text{PF}_6)$ (3-NO <sub>3</sub> ).....          | - 8 -  |
| 2    | Spectra .....                                                                                                   | - 9 -  |
| 3    | X-Ray Crystallography .....                                                                                     | - 28 - |
| 4    | Computational Details.....                                                                                      | - 34 - |
| 5    | References .....                                                                                                | - 43 - |

# 1 Experimental Procedures

## 1.1 Materials and Methods

All experiments were carried out under an atmosphere of purified argon or nitrogen in the MBraun glove boxes LABmaster 130 and UNILab or using standard Schlenk techniques.

Diethylether was dried over Na/K alloy. *n*-Hexane was dried over LiAlH<sub>4</sub>. Dichloromethane and MeCN were dried over CaH<sub>2</sub>. After drying, solvents were stored over appropriate molecular sieves. Deuterated solvents were degassed with freeze-pump-thaw cycles and stored over appropriate molecular sieves under argon atmosphere.

<sup>1</sup>H, <sup>13</sup>C, <sup>11</sup>B and <sup>31</sup>P NMR spectra were recorded using Bruker Avance HD 250, 300 A, DRX 400, DRX 500 and Avance 500 NMR spectrometers as well as Agilent Technologies 400 MHz VNMRs and 500 MHz DD2 NMR spectrometers at 300 K. <sup>1</sup>H and <sup>13</sup>C {<sup>1</sup>H}, <sup>13</sup>C-APT (attached proton test) NMR chemical shifts are reported in ppm downfield from tetramethylsilane. The resonance of the residual protons in the deuterated solvent was used as internal standard for <sup>1</sup>H NMR spectra. The solvent peak of the deuterated solvent was used as internal standard for <sup>13</sup>C NMR spectra. The assignment of resonances in <sup>1</sup>H and <sup>13</sup>C NMR spectra was further supported by <sup>1</sup>H COSY and <sup>1</sup>H,<sup>13</sup>C HMQC NMR spectra. <sup>31</sup>P NMR chemical shifts are reported in ppm downfield from H<sub>3</sub>PO<sub>4</sub> and referenced to an external 85 % solution of phosphoric acid in D<sub>2</sub>O. The following abbreviations are used for the description of NMR data: br (broad), s (singlet), d (doublet), t (triplet), q (quartet), quin (quintet), m (multiplet).

FT-IR spectra were recorded by attenuated total reflection of the solid samples on a Bruker Tensor IF37 spectrometer. The intensity of the absorption band is indicated as w (weak), m (medium), s (strong), vs (very strong) and br (broad).

HR-ESI mass spectra were acquired with a LTQ-FT mass spectrometer (Thermo Fisher Scientific) or with Q-Exactive Plus mass spectrometer (Thermo Fisher Scientific). The resolution was set to 100.000. Elemental analyses were done by combustion analysis in a vario Micro cube (Elementar). In a glovebox, samples were weighed in Sn-crucibles of known mass and kept under exclusion of ambient air by cold pressure welding. Measurements were performed as double determinations, the values presented herein are the arithmetic mean.

Bis(diphenylphosphino)methane (dppm) was synthesized following the procedure published by K. Sommer.<sup>[1]</sup> [HC(dppm)<sub>2</sub>]Cl (**1a**) was synthesized according to the literature by Peringer and coworkers.<sup>[2]</sup>

### 1.1 Synthesis of [({dppm}<sub>2</sub>CH)CuCl](PF<sub>6</sub>) (**2-Cl**)

121 mg [({dppm}<sub>2</sub>CH)(PF<sub>6</sub>) (**1b**, 131 μmol, 1.0 eq.) and 13 mg CuCl (131 μmol, 1.0 eq.) were dissolved in 10 ml MeCN. *In vacuo* removal of all volatiles and recrystallization of the residue from CH<sub>2</sub>Cl<sub>2</sub>/*n*-hexane leads to the formation of single crystals of **2-Cl** (101 mg, 98.5 μmol, 75.4% yield). <sup>31</sup>P{<sup>1</sup>H} NMR (202 MHz, CD<sub>3</sub>CN) δ: -144.6 (sept, <sup>1</sup>J<sub>PF</sub> = 706.2 Hz, PF<sub>6</sub>), -27.2 (br, W<sub>1/2</sub> = 125.0 Hz, P-Cu-P), 22.1 (dd, J<sub>PP</sub> = 39.1 Hz, J<sub>PP</sub> = 27.3 Hz, P-CH-P) ppm. <sup>19</sup>F NMR (470 MHz, CD<sub>3</sub>CN) δ: -72.9 (d, <sup>1</sup>J<sub>FP</sub> = 706.4 Hz, PF<sub>6</sub>) ppm. <sup>1</sup>H NMR (500 MHz, CD<sub>3</sub>CN) δ: 2.93 (t, 1H, <sup>2</sup>J<sub>PH</sub> = 10.6 Hz, P-CH-P), 3.87 (br d, 4H, J = 9.5 Hz, P-CH<sub>2</sub>-P), 7.05 (t, 8H, J = 7.5 Hz, phenyl-H), 7.09-7.21 (m, 12H, phenyl-H), 7.33 (t, 4H, J = 7.4 Hz, phenyl-H), 7.44-7.55 (m, 16H, phenyl-H) ppm. <sup>13</sup>C APT NMR (126 MHz, CD<sub>3</sub>CN) δ: -2.1 (m, P-CH-P), 29.8 (br, P-CH<sub>2</sub>-P), 129.5 (t, J<sub>PC</sub> = 5.2 Hz, phenyl-C), 129.9 (t, J<sub>PC</sub> = 6.4 Hz, phenyl-C), 131.0 (s, phenyl-C), 133.5 (t, J<sub>PC</sub> = 6.2 Hz, phenyl-C), 133.5 (t, J<sub>PC</sub> = 3.1 Hz, phenyl-C), 133.6 (s, phenyl-C), 134.3 (br, phenyl-C), ppm. IR (ATR):  $\tilde{\nu}$  / cm<sup>-1</sup> = 3041 (w), 2972 (w), 2919 (w), 1587 (w), 1574 (w), 1486

(w), 1435 (m), 1375 (w), 1312 (w), 1262 (w), 1212 (w), 1178 (w), 1161 (w), 1145 (w), 1130 (w), 1108 (m), 1099 (m), 1026 (w), 999 (w), 962 (m), 840 (s), 825 (s), 788 (m), 774 (m), 755 (m), 732 (s), 686 (s), 616 (w), 555 (s), 522 (m), 499 (s), 481 (s), 467 (m), 451 (m), 423 (m), 414 (m), 403 (m). HR-ESI-MS (pos. mode, MeOH/HCOOH) m/z: 879.1451 (calculated for  $[(\text{dppm})_2\text{CH}]\text{CuCl}]^+$ ), 879.1487 (found,  $\Delta = 4.1$  ppm). Anal. Calcd for  $\text{C}_{51}\text{H}_{45}\text{Cl}_1\text{Cu}_1\text{P}_5\text{F}_6 \cdot 1.5\text{CH}_2\text{Cl}_2$ : C 54.68%, H 4.20%; Found: C 54.64%; H 4.10%.

## 1.2 Synthesis of $[(\text{dppm})_2\text{CH}]\text{CuBr}(\text{PF}_6)$ (**2-Br**)

115 mg  $[(\text{dppm})_2\text{CH}](\text{PF}_6)$  (**1b**, 124  $\mu\text{mol}$ , 1.0 eq.) and 17 mg CuBr (119  $\mu\text{mol}$ , 1.0 eq.) were dissolved in 10 ml MeCN. *In vacuo* removal of all volatiles and recrystallization of the residue from  $\text{CH}_2\text{Cl}_2/n$ -hexane leads to the formation of single crystals of **2-Br** (93 mg, 86.9  $\mu\text{mol}$ , 70.0 % yield).  $^{31}\text{P}\{^1\text{H}\}$  NMR (202 MHz,  $\text{CD}_3\text{CN}$ )  $\delta$ : -144.6 (sept,  $^1J_{\text{PF}} = 706.4$  Hz,  $\text{PF}_6$ ), -28.5 (br,  $W_{1/2} = 151.8$  Hz,  $P\text{-Cu-P}$ ), 23.1 (dd,  $J_{\text{PP}} = 40.6$  Hz,  $J_{\text{PP}} = 27.7$  Hz,  $P\text{-CH-P}$ ) ppm.  $^1\text{H}$  NMR (500 MHz,  $\text{CD}_3\text{CN}$ )  $\delta$ : 2.90 (t, 1H,  $^2J_{\text{PH}} = 11.6$  Hz,  $P\text{-CH-P}$ ), 3.91 (br m, 4H,  $P\text{-CH}_2\text{-P}$ ), 7.03 (t, 8H,  $J = 7.5$  Hz, phenyl- $H$ ), 7.09-7.20 (m, 12H, phenyl- $H$ ), 7.33 (t, 4H,  $J = 7.4$  Hz, phenyl- $H$ ), 7.44-7.58 (m, 16H, phenyl- $H$ ) ppm.  $^{13}\text{C}$  APT NMR (126 MHz,  $\text{CD}_3\text{CN}$ )  $\delta$ : 29.1 (br,  $P\text{-CH}_2\text{-P}$ ), 29.6 (br,  $P\text{-CH}_2\text{-P}$ ), 129.5 (t,  $J_{\text{PC}} = 4.9$  Hz, phenyl- $C$ ), 129.9 (t,  $J_{\text{PC}} = 6.4$  Hz, phenyl- $C$ ), 130.9 (s, phenyl- $C$ ), 131.9 (t,  $J_{\text{PC}} = 8.2$  Hz, phenyl- $C$ ), 133.6 (t,  $J_{\text{PC}} = 5.4$  Hz, phenyl- $C$ ), 134.3 (br, phenyl- $C$ ), ppm. IR (ATR):  $\tilde{\nu} / \text{cm}^{-1} = 3056$  (w), 3043 (w), 2972 (w), 2954 (w), 2918 (w), 1800 (w), 1588 (w), 1576 (w), 1559 (w), 1486 (w), 1435 (m), 1375 (w), 1313 (w), 1270 (w), 1262 (w), 1211 (w), 1187 (w), 1177 (w), 1160 (w), 1145 (w), 1129 (w), 1107 (m), 1099 (m), 1073 (w), 1048 (w), 1026 (w), 999 (w), 959 (m), 868 (w), 840 (s), 826 (s), 809 (m), 788 (m), 773 (m), 755 (m), 731 (s), 696 (m), 686 (s), 616 (w), 569 (s), 527 (m), 521 (m), 499 (m), 481 (m), 467 (m), 452 (m), 429 (m), 429 (m), 424 (m), 414 (m), 402 (m). HR-ESI-MS (pos. mode, MeOH/HCOOH) m/z: 925.0957 (calculated for  $[(\text{dppm})_2\text{CH}]\text{CuBr}]^+$ ), 925.0925 (found,  $\Delta = 3.5$  ppm). Anal. Calcd for  $\text{C}_{51}\text{H}_{45}\text{Br}_1\text{Cu}_1\text{P}_5\text{F}_6 \cdot 1.4\text{CH}_2\text{Cl}_2$ : C 52.93%, H 4.05%; Found: C 52.77%; H 3.66%.

## 1.3 Synthesis of $[(\text{dppm})_2\text{CH}]\text{CuI}(\text{PF}_6)$ (**2-I**)

111 mg  $[(\text{dppm})_2\text{CH}](\text{PF}_6)$  (**1b**, 120  $\mu\text{mol}$ , 1.0 eq.) and 17 mg CuI (121  $\mu\text{mol}$ , 1.0 eq.) were dissolved in 10 ml MeCN. *In vacuo* removal of all volatiles and recrystallization of the residue from  $\text{CH}_2\text{Cl}_2/n$ -hexane leads to the formation of single crystals of **2-I** (91 mg, 81.5  $\mu\text{mol}$ , 68.0 % yield).  $^{31}\text{P}\{^1\text{H}\}$  NMR (202 MHz,  $\text{CD}_3\text{CN}$ )  $\delta$ : -144.6 (sept,  $^1J_{\text{PF}} = 706.4$  Hz,  $\text{PF}_6$ ), -30.6 (br,  $W_{1/2} = 201.4$  Hz,  $P\text{-Cu-P}$ ), 24.4 (dd,  $J_{\text{PP}} = 42.3$  Hz,  $J_{\text{PP}} = 27.5$  Hz,  $P\text{-CH-P}$ ) ppm.  $^{19}\text{F}$  NMR (470 MHz,  $\text{CD}_3\text{CN}$ )  $\delta$ : -72.9 (d,  $^1J_{\text{FP}} = 706.4$  Hz,  $\text{PF}_6$ ) ppm.  $^1\text{H}$  NMR (500 MHz,  $\text{CD}_3\text{CN}$ )  $\delta$ : 2.87 (t, 1H,  $^2J_{\text{PH}} = 12.2$  Hz,  $P\text{-CH-P}$ ), 3.93 (br m, 4H,  $P\text{-CH}_2\text{-P}$ ), 7.02 (t, 8H,  $J = 7.5$  Hz, phenyl- $H$ ), 7.10-7.18 (m, 12H, phenyl- $H$ ), 7.34 (t, 4H,  $J = 7.4$  Hz, phenyl- $H$ ), 7.44-7.57 (m, 16H, phenyl- $H$ ) ppm.  $^{13}\text{C}$  APT NMR (126 MHz,  $\text{CD}_3\text{CN}$ )  $\delta$ : -0.8 (m,  $P\text{-CH-P}$ ), 29.0 (br,  $P\text{-CH}_2\text{-P}$ ), 129.5 (t,  $J_{\text{PC}} = 4.9$  Hz, phenyl- $C$ ), 129.9 (t,  $J_{\text{PC}} = 6.4$  Hz, phenyl- $C$ ), 130.9 (s, phenyl- $C$ ), 133.3 (t,  $J_{\text{PC}} = 8.0$  Hz, phenyl- $C$ ), 133.7 (t,  $J_{\text{PC}} = 5.4$  Hz, phenyl- $C$ ), 134.4 (t,  $J_{\text{PC}} = 1.3$  Hz, phenyl- $C$ ), ppm. IR (ATR):  $\tilde{\nu} / \text{cm}^{-1} = 3055$  (w), 2968 (w), 2918 (w), 1588 (w), 1573 (w), 1485 (w), 1435 (m), 1375 (w), 1336 (w), 1312 (w), 1268 (w), 1212 (w), 1176 (w), 1159 (w), 1144 (w), 1129 (w), 1107 (m), 1026 (w), 999 (w), 957 (m), 839 (s), 826 (s), 787 (m), 773 (m), 753 (m), 732 (s), 696 (m), 686 (s), 616 (w), 556 (s), 521 (m), 499 (s), 480 (s), 467 (m), 423 (m), 400 (m). Anal. Calcd for  $\text{C}_{51}\text{H}_{45}\text{I}_1\text{Cu}_1\text{P}_5\text{F}_6 \cdot 1.43\text{CH}_2\text{Cl}_2$ : C 51.30%, H 3.91%; Found: C 51.32%, H 3.75%.

#### 1.4 Synthesis of $[(\text{dppm})_2\text{CH}]\text{Cu}(\text{NCMe})(\text{PF}_6)(\text{BF}_4)$ (**2-NCMe**)

103 mg  $[(\text{dppm})_2\text{CH}](\text{PF}_6)$  (**1b**, 111  $\mu\text{mol}$ , 1.0 eq.) and 35.5 mg  $[\text{Cu}(\text{NCMe})_4](\text{BF}_4)$  (113  $\mu\text{mol}$ , 1.0 eq.) were dissolved in 4 ml MeCN. After stirring for 16 h at ambient temperature the mixture is filtered and layered with 10 mL of diethylether and 2 mL of *n*-hexane. 59 mg of single crystals suitable for single crystal X-Ray diffraction of **2-NCMe** (50.2  $\mu\text{mol}$ , 45.1 % yield) were isolated after 10 days.  $^{31}\text{P}\{^1\text{H}\}$  NMR (202 MHz,  $\text{CD}_3\text{CN}$ )  $\delta$ : -144.6 (sept,  $^1J_{\text{PF}} = 706.6$  Hz,  $\text{PF}_6$ ), -20.1 (br,  $W_{1/2} = 458.3$  Hz,  $P\text{-Cu-P}$ ), 26.5 (dd,  $J_{\text{PP}} = 43.1$  Hz,  $J_{\text{PP}} = 26.7$  Hz,  $P\text{-CH-P}$ ) ppm.  $^{19}\text{F}$  NMR (470 MHz,  $\text{CD}_3\text{CN}$ )  $\delta$ : -151.6 (s,  $\text{BF}_4$ ), -72.9 (d,  $^1J_{\text{FP}} = 706.7$  Hz,  $\text{PF}_6$ ) ppm.  $^1\text{H}$  NMR (500 MHz,  $\text{CD}_3\text{CN}$ )  $\delta$ : 3.03 (t, 1H,  $^2J_{\text{PH}} = 12.8$  Hz,  $P\text{-CH-P}$ ), 3.84 (m, 4H,  $P\text{-CH}_2\text{-P}$ ), 7.14-7.23 (m, 16H, phenyl-*H*), 7.29 (br t, 4H,  $J = 7.4$  Hz, phenyl-*H*), 7.33-7.47 (m, 20H, phenyl-*H*) ppm.  $^{13}\text{C}$  APT NMR (126 MHz,  $\text{CD}_3\text{CN}$ )  $\delta$ : -1.8 (m,  $P\text{-CH-P}$ ), 28.8 (br d,  $J_{\text{PC}} = 65.4$  Hz,  $P\text{-CH}_2\text{-P}$ ), 130.0 (t,  $J_{\text{PC}} = 5.4$  Hz, phenyl-*C*), 130.2 (t,  $J_{\text{PC}} = 6.2$  Hz, phenyl-*C*), 131.6 (s, phenyl-*C*), 133.2 (t,  $J_{\text{PC}} = 8.5$  Hz, phenyl-*C*), 133.3 (t,  $J_{\text{PC}} = 5.4$  Hz, phenyl-*C*), 134.9 (t,  $J_{\text{PC}} = 1.5$  Hz, phenyl-*C*), ppm. IR (ATR):  $\tilde{\nu} / \text{cm}^{-1} = 3054$  (w), 2962 (w), 2950 (w), 2910 (w), 2312 (w), 2272 (w), 2115 (w), 1810 (w), 1589 (w), 1574 (w), 1486 (w), 1437 (m), 1377 (w), 1337 (w), 1314 (w), 1283 (w), 1223 (w), 1181 (w), 1156 (w), 1106 (m), 1091 (m), 1047 (m), 1034 (m), 1025 (m), 996 (m), 961 (m), 835 (s), 812 (m), 791 (w), 777 (w), 767 (w), 749 (m), 735 (s), 687 (s), 615 (w), 556 (s), 522 (m), 500 (s), 484 (s), 472 (s), 447 (m), 429 (m), 415 (m). HR-ESI-MS (pos. mode, MeCN)  $m/z$ : 422.0878 (calculated for  $[(\text{dppm})_2\text{CH}]\text{Cu}^{2+}$ ), 422.0889 (found,  $\Delta = 2.6$  ppm). Anal. Calcd for  $\text{C}_{53}\text{H}_{48}\text{B}_1\text{Cu}_1\text{F}_{10}\text{NP}_5$ : C 56.93%, H 4.33%, N 1.25; Found: C 57.27%, H 3.99%, N 1.52%.

#### 1.5 Synthesis of $[(\text{dppm})_2\text{CH}]\text{Ag}(\text{PF}_6)_2$ (**3**)

102 mg  $[(\text{dppm})_2\text{CH}](\text{PF}_6)$  (**1b**, 110  $\mu\text{mol}$ , 1.0 eq.) and 27 mg  $\text{AgPF}_6$  (107  $\mu\text{mol}$ , 1.0 eq.) were dissolved in 10 ml MeCN and stirred at ambient temperature for 16 hours. All volatiles of the mixture were removed *in vacuo* and 10 ml of dichloromethane were added to residue. After filtration of the resulting mixture the filtrate was layered with 20 ml of *n*-hexane. After the completed diffusion, isolation and subsequent drying of the formed crystalline solid under high vacuum 92 mg (75.4  $\mu\text{mol}$ , 69 %) of **3** were isolated.  $^{31}\text{P}\{^1\text{H}\}$  NMR (202 MHz,  $\text{CD}_2\text{Cl}_2$ )  $\delta$ : -144.1 (sept,  $^1J_{\text{PF}} = 713.7$  Hz,  $\text{PF}_6$ ), -8.9 (dm,  $^1J_{\text{PAg}} = 519.9$  Hz,  $P\text{-Ag-P}$ ), 22.2 (t,  $J_{\text{PP}} = 14.5$  Hz,  $P\text{-CH-P}$ ) ppm.  $^{19}\text{F}$  NMR (470 MHz,  $\text{CD}_2\text{Cl}_2$ )  $\delta$ : -71.5 (d,  $^1J_{\text{FP}} = 713.6$  Hz,  $\text{PF}_6$ ) ppm.  $^1\text{H}$  NMR (500 MHz,  $\text{CD}_2\text{Cl}_2$ )  $\delta$ : 2.66 (t, 1H,  $^2J_{\text{PH}} = 7.9$  Hz,  $P\text{-CH-P}$ ), 3.53 (m, 4H,  $P\text{-CH}_2\text{-P}$ ), 7.18-7.24 (m, 8H, phenyl-*H*), 7.27-7.33 (m, 8H, phenyl-*H*), 7.39-7.53 (m, 16H, phenyl-*H*), 7.56-7.64 (m, 8H, phenyl-*H*) ppm.  $^{13}\text{C}$ -APT NMR (126 MHz,  $\text{CD}_2\text{Cl}_2$ )  $\delta$ : 123.1 (s, phenyl-*C*), 123.8 (m, phenyl-*C*), 128.5 (m, phenyl-*C*), 130.1 (t,  $J_{\text{PC}} = 6.4$  Hz, phenyl-*C*), 130.3 (t,  $J_{\text{PC}} = 5.2$  Hz, phenyl-*C*), 132.5 (t,  $J_{\text{PC}} = 5.2$  Hz, phenyl-*C*), 132.6 (s, phenyl-*C*), 133.6 (t,  $J_{\text{PC}} = 5.2$  Hz, phenyl-*C*), 134.5 (s, phenyl-*C*) ppm. The  $\text{CH}_2$ - and  $(\text{R}_3\text{P})\text{CH}$ -resonances of the PCP-ligand could not directly be detected by  $^{13}\text{C}$ -APT NMR spectroscopy, but were located in the  $^1\text{H}$ ,  $^{13}\text{C}$ -HSQC NMR spectrum:  $\delta = -2.7$  ( $P\text{-CH-P}$ ), 30.7 ( $P\text{-CH}_2\text{-P}$ ) ppm. IR (ATR):  $\tilde{\nu} / \text{cm}^{-1} = 3063$  (w), 2963 (w), 2915 (w), 2052 (w), 1587 (m), 1483 (m), 1436 (s), 1378 (m), 1334 (m), 1308 (m), 1218 (m), 1191 (m), 1165 (m), 1154 (m), 1106 (s), 1028 (m), 999 (m), 988 (s), 924 (m), 851 (s), 824 (vs), 782 (s), 766 (s), 746 (s), 731 (vs), 688 (vs), 617 (m), 555 (vs), 527 (s), 522 (s), 499 (s), 470 (s), 452 (s), 429 (s), 413 (s). Anal. Calcd for  $\text{C}_{51}\text{H}_{45}\text{Ag}_1\text{F}_{12}\text{P}_6$ : C 51.93%, H 3.85%; Found: C 51.88%, H 3.47%.

#### 1.6 Synthesis of $[(\text{dppm})_2\text{CH}]\text{AgCl}(\text{NO}_3)$ (**3-Cl**)

303 mg  $[(\text{dppm})_2\text{CH}]\text{Cl}$  (**1a**, 371  $\mu\text{mol}$ , 1.0 eq.) and 63 mg  $\text{AgNO}_3$  (371  $\mu\text{mol}$ , 1.0 eq.) were dissolved in 10 ml MeCN. After stirring at ambient temperature for ten minutes a colorless

precipitate is formed. All volatiles of the mixture were removed *in vacuo* and 10 ml of dichloromethane were added to residue. After filtration of the resulting mixture into a light protected Schlenk tube, the filtrate is layered with 20 ml of *n*-hexane. After the completed diffusion, isolation and subsequent drying of the formed crystalline solid under high vacuum 333 mg (337  $\mu\text{mol}$ , 91 %) of **3-Cl** were isolated.  $^{31}\text{P}\{^1\text{H}\}$  NMR (202 MHz,  $\text{CD}_2\text{Cl}_2$ )  $\delta$ : 18.6 (m, *P-CH-P*), -16.2 (br, *P-Ag-P*) ppm.  $^1\text{H}$  NMR (500 MHz,  $\text{CD}_2\text{Cl}_2$ )  $\delta$ : 2.54 (t, 1H,  $^2J_{\text{PH}} = 8.1$  Hz, *P-CH-P*), 4.73 (m, 4H, *P-CH<sub>2</sub>-P*), 7.07 (m, 16H, phenyl-*H*), 7.17 (t, 4H,  $J_{\text{HH}} = 7.5$  Hz, phenyl-*H*), 7.24 (t, 4H,  $J_{\text{HH}} = 7.3$  Hz, phenyl-*H*), 7.54 (m, 8H, phenyl-*H*), 7.67 (dd, 8H,  $J = 8.1$  Hz,  $J = 11.7$  Hz, phenyl-*H*) ppm.  $^{13}\text{C}$ -APT NMR (126 MHz,  $\text{CD}_2\text{Cl}_2$ )  $\delta$ : -3.8 (tt,  $^1J_{\text{PC}} = 158.1$  Hz,  $^3J_{\text{PC}} = 8.7$  Hz, *P-CH-P*), 29.5 (br m, *P-CH<sub>2</sub>-P*), 124.6 (m, phenyl-*C*), 129.0 (t,  $J_{\text{PC}} = 5.2$  Hz, phenyl-*C*), 129.2 (t,  $J_{\text{PC}} = 12.9$  Hz, phenyl-*C*), 130.2 (s, phenyl-*C*), 132.9 (m, phenyl-*C*), 133.1 (s, phenyl-*C*), 133.2 (t,  $J_{\text{PC}} = 5.2$  Hz, phenyl-*C*), 133.6 (t,  $J_{\text{PC}} = 9.3$  Hz, phenyl-*C*) ppm. IR (ATR):  $\tilde{\nu} / \text{cm}^{-1} = 3050$  (w), 3962 (w), 2884 (w), 2786 (w), 2711 (w), 1762 (w), 1653 (w), 1588 (w), 1575 (w), 1485 (m), 1435 (s), 1379 (m), 1338 (w), 1260 (m), 1217 (m), 1182 (m), 1160 (m), 1105 (s), 1026 (m), 999 (m), 981 (s), 803 (m), 784 (m), 735 (s), 685 (s), 615 (w), 530 (m), 522 (m), 499 (s), 482 (s), 473 (s), 451 (m), 442 (m), 415 (m), 405 (m), 376 (m), 351 (m), 319 (w), 279 (w), 259 (w), 225 (m), 215 (w). HR-ESI-MS (pos. mode, MeCN) *m/z*: 887.1436 (calculated for  $[(\{\text{dppm}\}_2\text{C})\text{Ag}]^+$ ), 887.1447 (found,  $\Delta = 1.2$  ppm).

### 1.7 Synthesis of $[(\{\text{dppm}\}_2\text{CH})\text{AgBr}](\text{PF}_6)$ (**3-Br**)

211 mg  $[(\{\text{dppm}\}_2\text{CH})(\text{PF}_6)$  (**1b**, 228  $\mu\text{mol}$ , 1.0 eq.) and 42.6 mg AgBr (227  $\mu\text{mol}$ , 1.0 eq.) were suspended in a mixture of 5 ml  $\text{CH}_2\text{Cl}_2$  and 2 ml MeCN. Stirring of the mixture at ambient temperature for 16 hours results in the formation of clear solution. Layering of the solution with diethylether yields 134 mg of a single crystalline solid of complex **3-Br** (120  $\mu\text{mol}$ , 52.6 %).  $^{31}\text{P}\{^1\text{H}\}$  NMR (162 MHz,  $\text{CD}_3\text{CN}$ )  $\delta$ : -144.6 (sept,  $^1J_{\text{PF}} = 706.4$  Hz,  $\text{PF}_6$ ), -19.6 (br, *P-Ag-P*), 18.3 (m, *P-CH-P*) ppm.  $^1\text{H}$  NMR (500 MHz,  $\text{CD}_3\text{CN}$ )  $\delta$ : 2.58 (t, 1H,  $^2J_{\text{PH}} = 7.2$  Hz, *P-CH-P*), 3.67 (m, 4H, *P-CH<sub>2</sub>-P*), 7.08-7.21 (m, 16H, phenyl-*H*), 7.25-7.32 (m, 4H, phenyl-*H*), 7.32-7.44 (m, 12H, phenyl-*H*), 7.67 (m, 8H, phenyl-*H*) ppm.  $^{13}\text{C}\{^1\text{H}\}$  NMR (126 MHz,  $\text{CD}_3\text{CN}$ )  $\delta$ : -3.9 (t,  $^2J_{\text{PC}} = 8.2$  Hz, *P-CH-P*), 29.1 (m, *P-CH<sub>2</sub>-P*), 124.8 (s, phenyl-*C*), 125.8 (s, phenyl-*C*), 129.8 (t,  $J_{\text{PC}} = 5.3$  Hz, phenyl-*C*), 130.0 (t,  $J_{\text{PC}} = 6.5$  Hz, phenyl-*C*), 131.7 (s, phenyl-*C*), 133.4 (t,  $J_{\text{PC}} = 5.3$  Hz, phenyl-*C*), 134.2 (t,  $J_{\text{PC}} = 5.5$  Hz, phenyl-*C*), 134.2 (s superimposed, phenyl-*C*) ppm. IR (ATR):  $\tilde{\nu} / \text{cm}^{-1} = 3058$  (w), 1588 (w), 1484 (w), 1435 (m), 1374 (w), 1313 (w), 1270 (w), 1216 (w), 1179 (w), 1149 (w), 1106 (m), 1026 (w), 982 (m), 838 (s), 824 (s), 788 (m), 731 (s), 687 (s), 529 (s), 498 (s), 481 (s), 444 (m), 416 (m), 376 (m), 351 (m), 279 (m), 251 (m), 225 (m), 212 (m) ppm.

### 1.8 Synthesis of $[(\{\text{dppm}\}_2\text{CH})\text{AgI}](\text{PF}_6)$ (**3-I**)

106 mg  $[(\{\text{dppm}\}_2\text{CH})(\text{PF}_6)$  (**1b**, 114  $\mu\text{mol}$ , 1.0 eq.) and 27 mg AgI (115  $\mu\text{mol}$ , 1.0 eq.) were suspended in 10 ml  $\text{CH}_2\text{Cl}_2$ . Stirring of the mixture at ambient temperature for 16 hours results in the formation of clear solution. Layering of the solution with *n*-hexane yields 118 mg of a single crystalline solid of complex **3-I** (102  $\mu\text{mol}$ , 88.8 %).  $^{31}\text{P}\{^1\text{H}\}$  NMR (162 MHz,  $\text{CD}_2\text{Cl}_2$ )  $\delta$ : -144.1 (sept,  $^1J_{\text{PF}} = 711.4$  Hz,  $\text{PF}_6$ ), -22.5 (br, *P-Ag-P*), 18.4 (m, *P-CH-P*) ppm.  $^1\text{H}$  NMR (500 MHz,  $\text{CD}_2\text{Cl}_2$ )  $\delta$ : 2.40 (br, 1H, *P-CH-P*), 3.58 (br, 4H, *P-CH<sub>2</sub>-P*), 7.10-7.19 (br m, 16H, phenyl-*H*), 7.25 (br, 4H, phenyl-*H*), 7.35 (br t, 4H,  $J_{\text{PH}} = 7.5$  Hz, phenyl-*H*), 7.67 (m superimposed, 16H, phenyl-*H*) ppm.  $^{13}\text{C}$ -APT NMR (126 MHz,  $\text{CD}_2\text{Cl}_2$ )  $\delta$ : 30.0 (m, *P-CH<sub>2</sub>-P*), 129.4 (t,  $J_{\text{PC}} = 5.0$  Hz, phenyl-*C*), 129.7 (t,  $J_{\text{PC}} = 6.4$  Hz, phenyl-*C*), 130.9 (s, phenyl-*C*), 132.7 (superimposed, phenyl-*C*), 133.2 (m, phenyl-*C*), 133.7 (s, phenyl-*C*) ppm. IR (ATR):  $\tilde{\nu} / \text{cm}^{-1} = 3055$  (w), 2966 (w), 2911 (w), 2325 (w), 2114 (w), 1981 (w), 1802 (w), 1620 (w), 1588 (w), 1484 (m), 1435 (s), 1374 (w), 1336 (w), 1312 (w), 1267 (w), 1217 (w), 1178 (m), 1149 (m), 1136 (w), 1107 (s), 1069 (w), 1026 (m), 982 (s), 837 (w), 824 (vs), 789 (m), 776 (m), 729 (vs), 697 (s), 685 (vs), 615 (w), 555 (vs), 528 (s), 521 (s), 499 (s), 481 (s), 467 (s), 428 (m), 416 (m), 402 (m), 376 (m), 352 (m), 305 (w), 286 (w), 253 (w), 221 (w), 214 (w), 205 (w). HR-ESI-

MS (+) m/z: 1015.0562 (calculated for  $[(\text{dppm})_2\text{CH}]\text{AgI}^+$ ), 1015.0581 (found,  $\Delta = 1.9$  ppm). Anal. Calcd for  $\text{C}_{53}\text{H}_{48}\text{Ag}_1\text{F}_{61}\text{P}_5$ : C 48.92%, H 3.75%; Found: C 48.31%, H 3.41%.

### 1.9 Synthesis of $[(\text{dppm})_2\text{CH}]\text{Ag}(\text{NCMe})(\text{PF}_6)_2$ (**3-NCMe**)

146 mg  $[(\text{dppm})_2\text{CH}](\text{PF}_6)$  (**1b**, 158  $\mu\text{mol}$ , 1.0 eq.) and 40 mg  $\text{AgPF}_6$  (158  $\mu\text{mol}$ , 1.0 eq.) were dissolved in 2 ml MeCN and stirred at ambient temperature for 16 hours. Layering of the reaction mixture with 8 ml of diethylether results in the formation of 139 mg **3-NCMe** (114  $\mu\text{mol}$ , 72.1 %) as a crystalline solid.

$^1\text{H}$  NMR (500 MHz,  $\text{CD}_3\text{CN}$ )  $\delta$ : 2.29 (t, 1H,  $^2J_{\text{PH}} = 7.2$  Hz, P-CH-P), 3.53 (m, 4H, P-CH<sub>2</sub>-P), 7.18 (m, 8H, phenyl-H), 7.31 (m, 8H, phenyl-H), 7.37 (m, 8H, phenyl-H), 7.46 (m, 8H, phenyl-H), 7.60 (m, 8H, phenyl-H) ppm.  $^{13}\text{C}$ -APT NMR (126 MHz,  $\text{CD}_3\text{CN}$ )  $\delta$ : 124.8 (s, phenyl-C), 125.6 (s, phenyl-C), 130.2 (t,  $J_{\text{PC}} = 6.5$  Hz, phenyl-C), 130.2 (t,  $J_{\text{PC}} = 6.5$  Hz, phenyl-C), 130.4 (t,  $J_{\text{PC}} = 5.5$  Hz, phenyl-C), 132.5 (s, phenyl-C), 133.2 (t,  $J_{\text{PC}} = 5.5$  Hz, phenyl-C), 134.0 (t,  $J_{\text{PC}} = 9.5$  Hz, phenyl-C), 134.7 (s, phenyl-C) ppm. The CH<sub>2</sub>- and (R<sub>3</sub>P)CH-resonances of the PCP-ligand could not directly be detected by  $^{13}\text{C}$ -APT NMR spectroscopy, but were located in the  $^1\text{H}$ ,  $^{13}\text{C}$ -HSQC NMR spectrum:  $\delta = -4.3$  (P-CH-P), The CH<sub>2</sub>- and (R<sub>3</sub>P)CH-resonances of the PCP-ligand could not directly be detected by  $^{13}\text{C}$ -APT NMR spectroscopy, but were located in the  $^1\text{H}$ ,  $^{13}\text{C}$ -HSQC NMR spectrum:  $\delta = -2.7$  (P-CH-P), 30.7 (P-CH<sub>2</sub>-P) ppm.  $^{31}\text{P}\{^1\text{H}\}$  NMR (122 MHz,  $\text{CD}_3\text{CN}$ )  $\delta$ : -144.3 (sept,  $^1J_{\text{PF}} = 708.8$  Hz,  $\text{PF}_6$ ), -13.7 (br d,  $^1J_{\text{PAG}} = 439.2$  Hz, P-Ag-P), 20.6 (dd,  $J_{\text{PP}} = 24.3$  Hz,  $J_{\text{PP}} = 14.4$  Hz, P-CH-P) ppm. IR (ATR):  $\tilde{\nu} / \text{cm}^{-1} = 3057$  (w), 2960 (w), 2912 (w), 2312 (w), 2275 (w), 1588 (w), 1574 (w), 1485 (w), 1436 (m), 1376 (w), 1335 (w), 1314 (w), 1219 (w), 1180 (w), 1158 (w), 1144 (w), 1105 (m), 1073 (w), 1026 (w), 999 (w), 971 (m), 933 (w), 832 (s), 820 (s), 762 (m), 749 (s), 741 (s), 731 (s), 687 (s), 616 (w), 555 (s), 526 (m), 521 (s), 499 (s), 484 (s), 472 (s), 445 (m), 423 (m). HR-ESI-MS (+) m/z: 887.1439 (calculated for  $[(\text{dppm})_2\text{C}]\text{Ag}^+$ ), 887.1447 (found,  $\Delta = 0.9$  ppm). Anal. Calcd for  $\text{C}_{53}\text{H}_{48}\text{Ag}_1\text{F}_{12}\text{N}_1\text{P}_6$ : C 52.15%, H 3.96%, N 1.15; Found: C 51.87%, H 3.55%, N 1.49%.

### 1.10 Synthesis of $[(\text{dppm})_2\text{CH}]\text{Ag}(\text{H}_2\text{O})(\text{PF}_6)_2$ (**3-H<sub>2</sub>O**)

211 mg  $[(\text{dppm})_2\text{CH}](\text{PF}_6)$  (**1b**, 220  $\mu\text{mol}$ , 1.0 eq.) and 55.6 mg  $\text{AgPF}_6$  (220  $\mu\text{mol}$ , 1.0 eq.) were dissolved in 10 ml  $\text{CH}_2\text{Cl}_2$  and 2 mL of water-containing MeOH. After stirring at ambient temperature for 16 hour the mixture is filtered through syringe filter and the resulting filtrate is layered with  $\text{Et}_2\text{O}$ . Within five days single crystals of **3-H<sub>2</sub>O** are formed, which were separated and dried in a stream of air, yielding 139 mg of **3-H<sub>2</sub>O** (123  $\mu\text{mol}$ , 72.1 %). Complex **3** is formed, when **3-H<sub>2</sub>O** is dried under vacuum.  $^1\text{H}$  NMR (500 MHz,  $\text{CD}_2\text{Cl}_2$ )  $\delta$ : 1.72 (br, 2H, Ag-OH<sub>2</sub>), 2.66 (t, 1H,  $^2J_{\text{PH}} = 7.9$  Hz, P-CH-P), 3.87 (br m, 4H, P-CH<sub>2</sub>-P), 7.15-7.24 (br m, 8H, phenyl-H), 7.26-7.34 (br m, 8H, phenyl-H), 7.38-7.53 (br m, 16H, phenyl-H), 7.56-7.65 (br m, 8H, phenyl-H) ppm.  $^{13}\text{C}$ -APT NMR (126 MHz,  $\text{CD}_2\text{Cl}_2$ )  $\delta$ : -2.8 (m, P-CH-P), 30.6 (m, P-CH<sub>2</sub>-P), 120.9 (s, phenyl-C), 123.2 (s, phenyl-C), 123.9 (s, phenyl-C), 128.4 (s, phenyl-C), 128.7 (t,  $J_{\text{PC}} = 17.3$  Hz, phenyl-C), 130.1 (t,  $J_{\text{PC}} = 6.4$  Hz, phenyl-C), 130.2 (t,  $J_{\text{PC}} = 5.7$  Hz, phenyl-C), 132.5 (t,  $J_{\text{PC}} = 5.5$  Hz, phenyl-C), 132.5 (s, phenyl-C), 133.6 (t,  $J_{\text{PC}} = 9.2$  Hz, phenyl-C), 134.6 (s, phenyl-C), 148.9 (s, phenyl-C), 149.4 (s, phenyl-C), 152.7 (s, phenyl-C) ppm.  $^{31}\text{P}\{^1\text{H}\}$  NMR (202 MHz,  $\text{CD}_2\text{Cl}_2$ )  $\delta$ : -144.1 (sept,  $^1J_{\text{PF}} = 714.1$  Hz,  $\text{PF}_6$ ), -22.5 (br, P-Ag-P), 18.4 (m, P-CH-P) ppm. IR (ATR):  $\tilde{\nu} / \text{cm}^{-1} = 3620$  (w), 3541 (w), 3062 (w), 2971 (w), 2894 (w), 1767 (w), 1609 (w), 1589 (w), 1576 (w), 1506 (w), 1483 (m), 1437 (w), 1409 (w), 1384 (w), 1365 (w), 1351 (w), 1312 (w), 1187 (w), 1176 (w), 1162 (w), 1143 (w), 1108 (m), 1081 (w), 1027 (w), 1015 (w), 999 (w), 948 (w), 832 (s), 784 (m), 776 (m), 755 (m), 738 (s), 724 (m), 687 (s), 655 (m), 617 (w), 555 (s), 520 (m), 499 (s), 470 (m), 441 (m), 418 (m), 406 (m). %. HR-ESI-MS (+) m/z: 887.1439 (calculated for  $[(\text{dppm})_2\text{C}]\text{Ag}^+$ ), 887.1444 (found,  $\Delta = 0.6$  ppm); 445.0759 (calculated for  $[(\text{dppm})_2\text{CH}]\text{Ag}^{2+}$ ), 445.0760 (found,  $\Delta = 0.2$  ppm). Anal. Calcd for  $\text{C}_{51}\text{H}_{47}\text{Ag}_1\text{F}_{12}\text{O}_1\text{P}_6$ : C 51.94%, H 4.52%; Found: C 52.34%, H 4.06%.

### 1.11 Synthesis of $[(\text{dppm})_2\text{CH}]\text{Ag}(\text{NO}_3)(\text{PF}_6)$ (**3-NO<sub>3</sub>**)

120 mg  $[(\text{dppm})_2\text{CH}](\text{PF}_6)$  (**1b**, 130  $\mu\text{mol}$ , 1.0 eq.) and 22 mg  $\text{AgNO}_3$  (115  $\mu\text{mol}$ , 1.0 eq.) were dissolved in 2 ml dichloromethane. After stirring for 72 h at ambient temperature the mixture is layered with 10 mL of *n*-hexane. After three days cuboid single crystals are formed, which were separated and dried in vacuo to give 59 mg of complex **3-NO<sub>3</sub>** (54  $\mu\text{mol}$ , 41.6 %).  $^{31}\text{P}\{^1\text{H}\}$  NMR (101 MHz,  $\text{CD}_2\text{Cl}_2$ )  $\delta$ : -144.4 (sept,  $^1J_{\text{PF}_6} = 711.2$  Hz,  $\text{PF}_6$ ), -14.8 (d br,  $^1J_{\text{PAg}} = 429.6$  Hz, *P*-Ag-*P*), 19.7 (dd,  $J_{\text{PP}} = 24.8$  Hz,  $J_{\text{PP}} = 16.6$  Hz, *P*-CH-*P*) ppm.  $^1\text{H}$  NMR (300 MHz,  $\text{CD}_2\text{Cl}_2$ )  $\delta$ : 3.36 (br m, 4H, *P*-CH<sub>2</sub>-*P*), 3.58 (br, 1H, *P*-CH-*P*), 7.15 (br m, 8H, phenyl-*H*), 7.30 (br m, 16H, phenyl-*H*), 7.41 (br m, 8H, phenyl-*H*), 7.56 (br m, 8H, phenyl-*H*) ppm.  $^{19}\text{F}$  NMR (470 MHz,  $\text{CD}_2\text{Cl}_2$ )  $\delta$ : -72.8 (d,  $^1J_{\text{FP}} = 711.2$  Hz,  $\text{PF}_6$ ) ppm.  $^{13}\text{C}$ -APT NMR (126 MHz,  $\text{CD}_2\text{Cl}_2$ )  $\delta$ : 124.5 (s, phenyl-*C*), 125.3 (s, phenyl-*C*), 129.7 (s, phenyl-*C*), 131.5 (s, phenyl-*C*), 132.6 (t,  $J_{\text{PC}} = 5.0$  Hz, phenyl-*C*), 133.4 (t,  $J_{\text{PC}} = 9.5$  Hz, phenyl-*C*), 133.9 (s, phenyl-*C*) ppm. The CH<sub>2</sub>- and (R<sub>3</sub>P)CH-resonances of the PCP-ligand could not directly be detected by  $^{13}\text{C}$ -APT NMR spectroscopy, but were in part located in the  $^1\text{H}, ^{13}\text{C}$ -HSQC NMR spectrum:  $\delta = 30.0$  (*P*-CH<sub>2</sub>-*P*) ppm.  $^{13}\text{C}\{^1\text{H}\}$  NMR (126 MHz,  $\text{CD}_2\text{Cl}_2$ )  $\delta$ : -3.8 (m, *P*-CH-*P*), 29.6 (br d,  $J_{\text{PC}} = 65.5$  Hz, *P*-CH<sub>2</sub>-*P*), 123.3 (br, phenyl-*C*), 124.5 (br, phenyl-*C*), 130.0 (br, phenyl-*C*), 132.1 (s, phenyl-*C*), 132.5 (br, phenyl-*C*), 133.4 (t,  $J_{\text{PC}} = 9.1$  Hz, phenyl-*C*), 134.4 (br, phenyl-*C*) ppm. IR (ATR):  $\tilde{\nu} / \text{cm}^{-1} = 3061$  (w), 2891 (w), 2814 (w), 1589 (w), 1575 (m), 1554 (m), 1484 (m), 1436 (s), 1404 (m), 1336 (w), 1316 (w), 1227 (m), 1185 (m), 1154 (w), 1141 (w), 1107 (m), 1072 (m), 1029 (m), 1009 (m), 989 (m), 924 (w), 823 (vs), 778 (m), 756 (s), 742 (s), 732 (vs), 687 (vs), 659 (m), 617 (w), 556 (s), 529 (m), 519 (m), 499 (s), 484 (s), 472 (s), 445 (m), 418 (m). HR-ESI-MS (+, MeOH) *m/z*: 887.1439 (calculated for  $[(\text{dppm})_2\text{C}]\text{Ag}^+$ ), 887.1441 found,  $\Delta = 0.23$  ppm). Anal. Calcd for  $\text{C}_{51}\text{H}_{45}\text{Ag}_1\text{F}_6\text{NO}_3\text{P}_5$ : C 55.86%, H 4.14%; Found: C 55.65%; H 4.09%.



## 2 Spectra

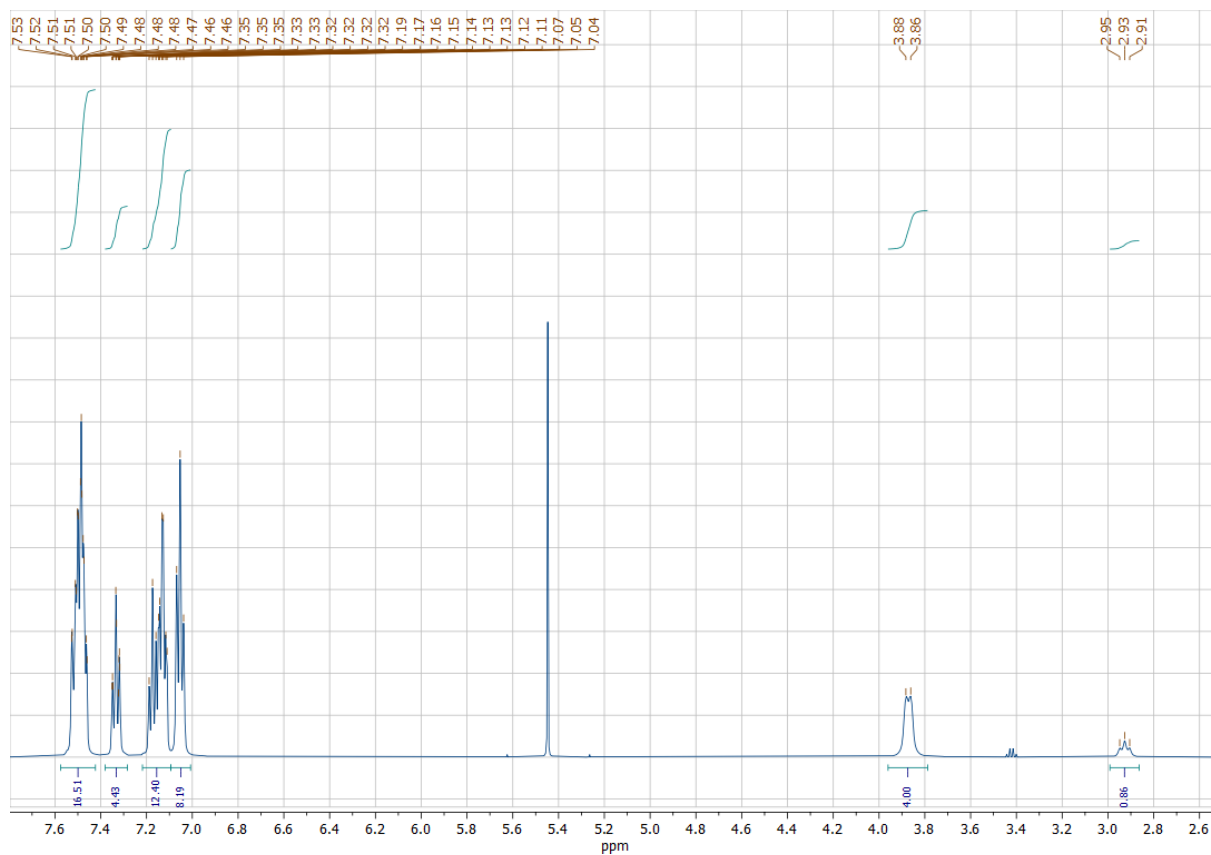

Figure 1  $^1\text{H}$  NMR spectrum of  $[(\text{dppm})_2\text{CH}]\text{CuCl}(\text{PF}_6)$  (**2-Cl**) in  $\text{CD}_3\text{CN}$ .

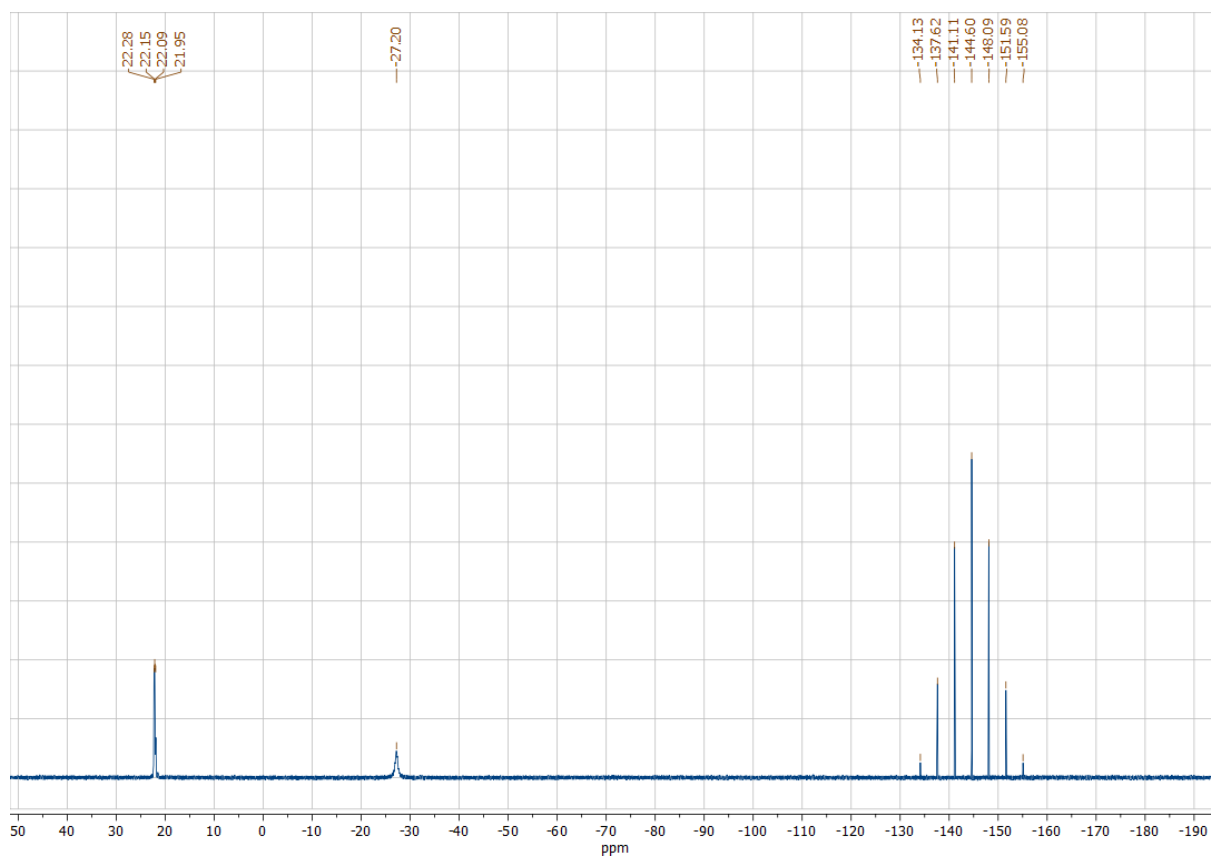

Figure 2  $^{31}\text{P}\{^1\text{H}\}$  NMR spectrum of  $[(\text{dppm})_2\text{CH}]\text{CuCl}(\text{PF}_6)$  (**2-Cl**) in  $\text{CD}_3\text{CN}$ .

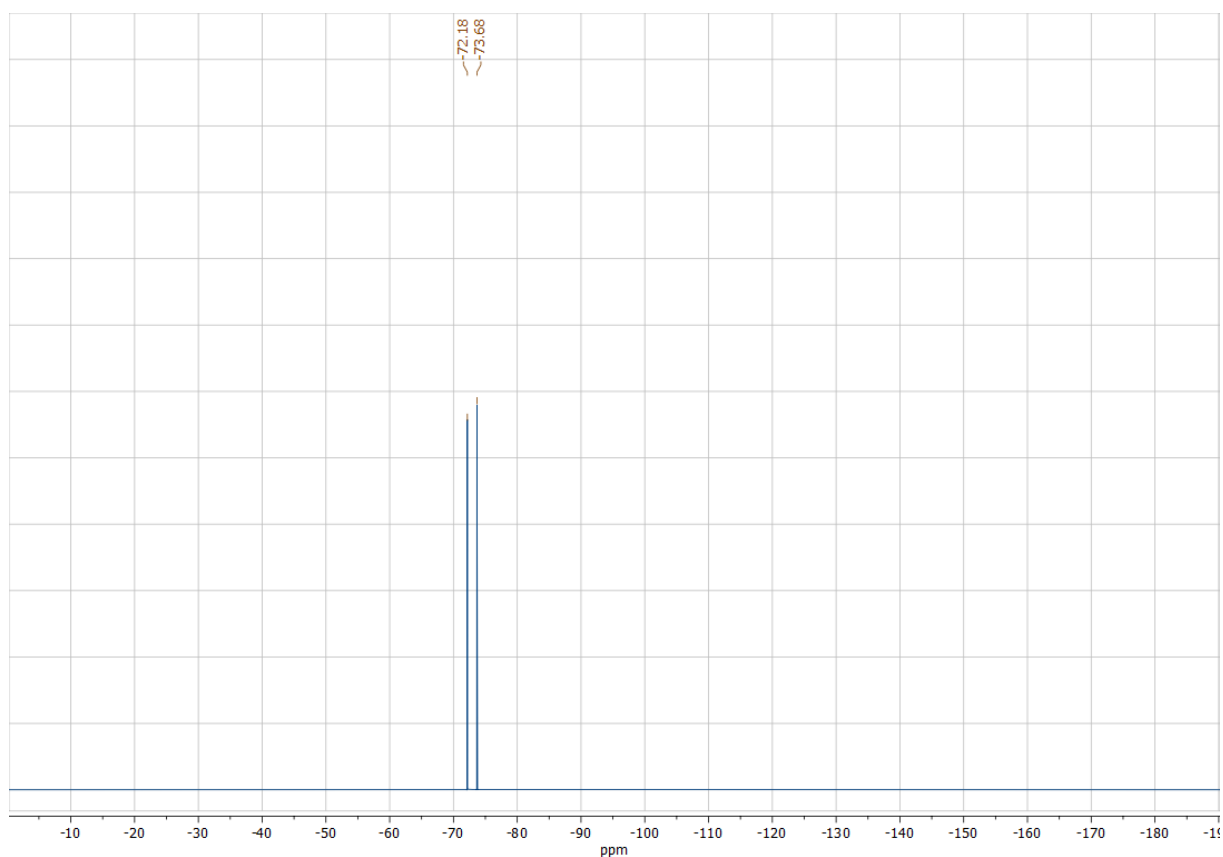

**Figure 3**  $^{19}\text{F}$  NMR spectrum of  $[(\text{dppm})_2\text{CH})\text{CuCl}](\text{PF}_6)$  (**2-Cl**) in  $\text{CD}_3\text{CN}$ .

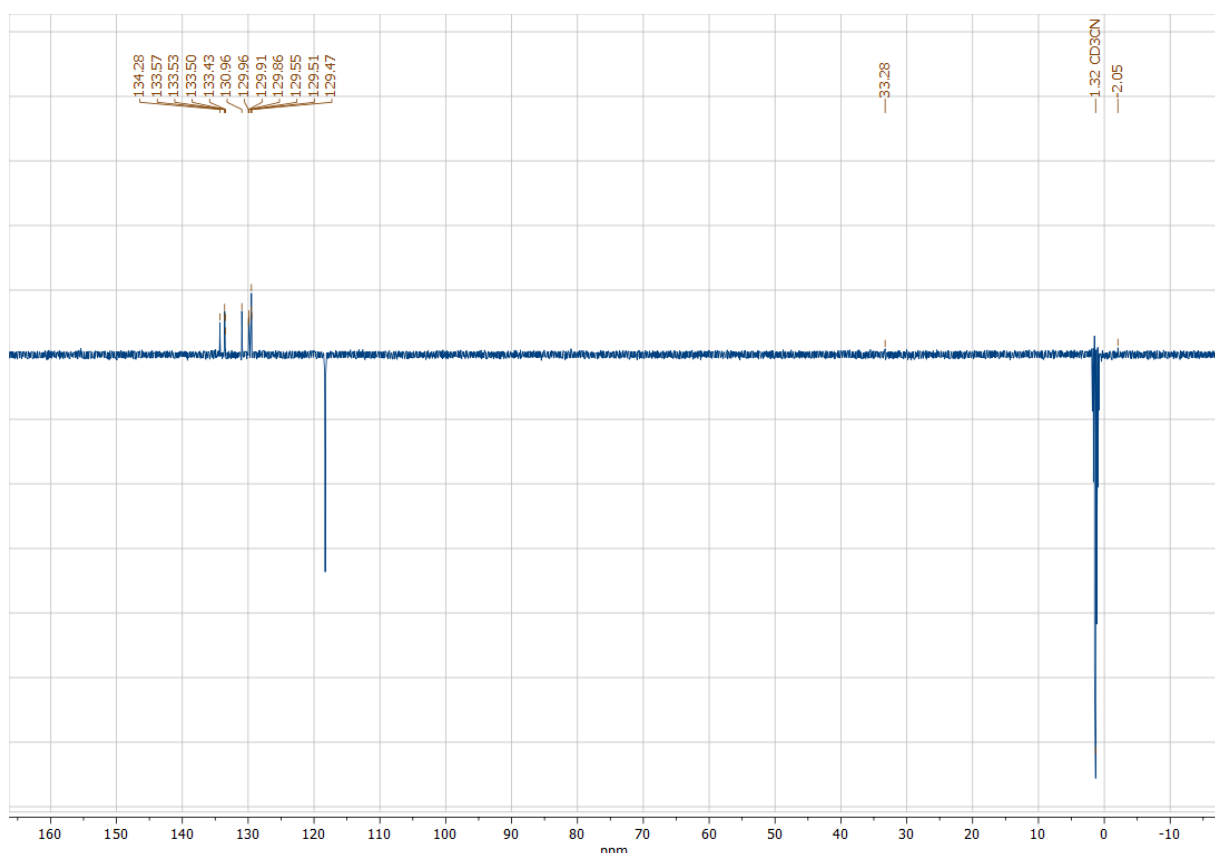

**Figure 4**  $^{13}\text{C}$ -APT NMR spectrum of  $[(\text{dppm})_2\text{CH})\text{CuCl}](\text{PF}_6)$  (**2-Cl**) in  $\text{CD}_3\text{CN}$ .

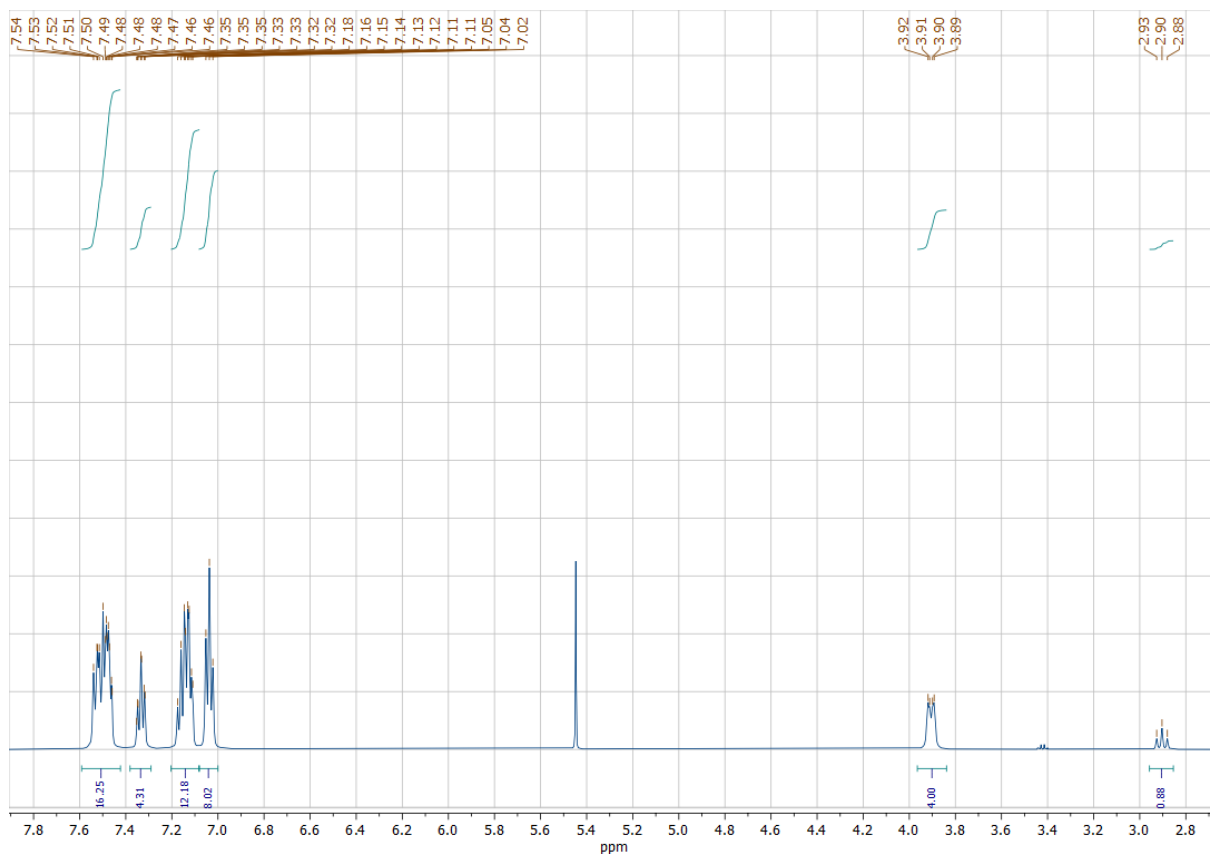

Figure 5  $^1\text{H}$  NMR spectrum of  $[(\text{dppm})_2\text{CH}]\text{CuBr}(\text{PF}_6)$  (**2-Br**) in  $\text{CD}_3\text{CN}$ .

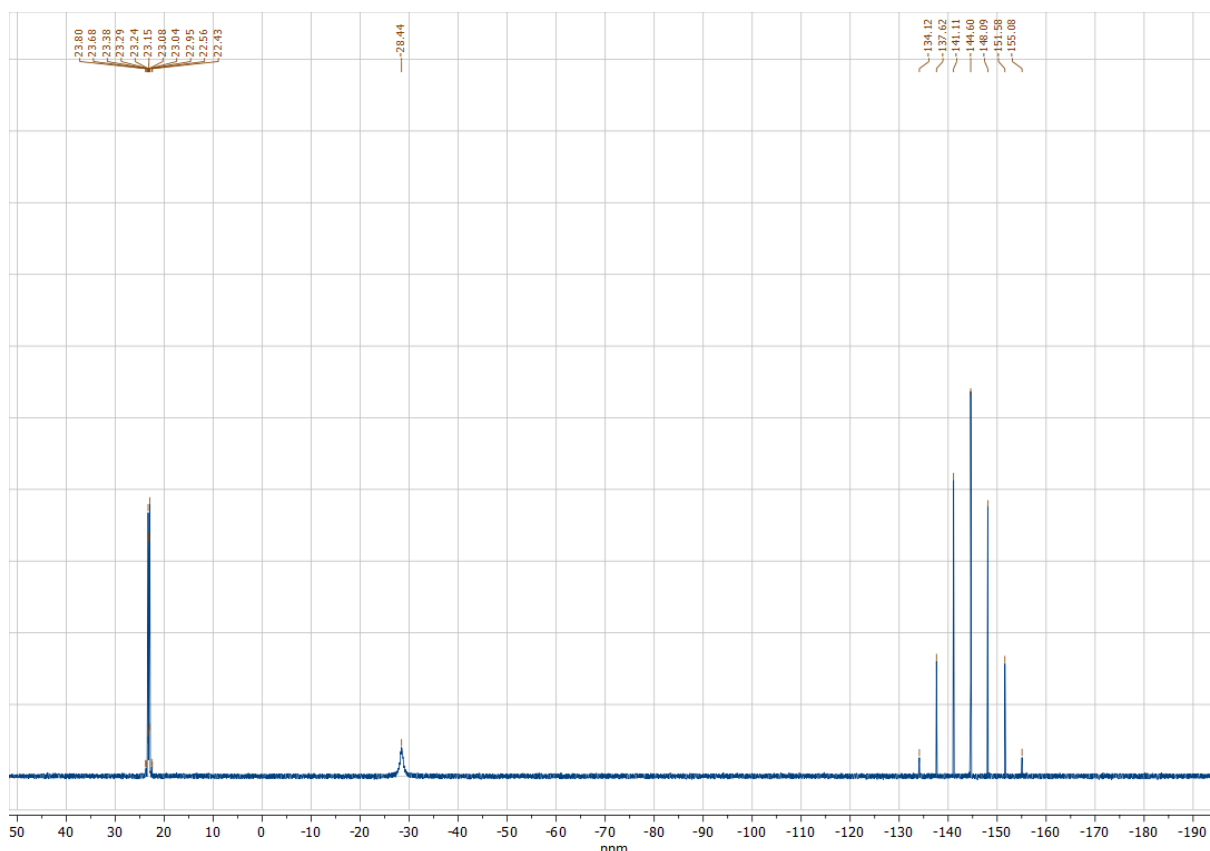

Figure 6  $^{31}\text{P}\{^1\text{H}\}$  NMR spectrum of  $[(\text{dppm})_2\text{CH}]\text{CuBr}(\text{PF}_6)$  (**2-Br**) in  $\text{CD}_3\text{CN}$ .

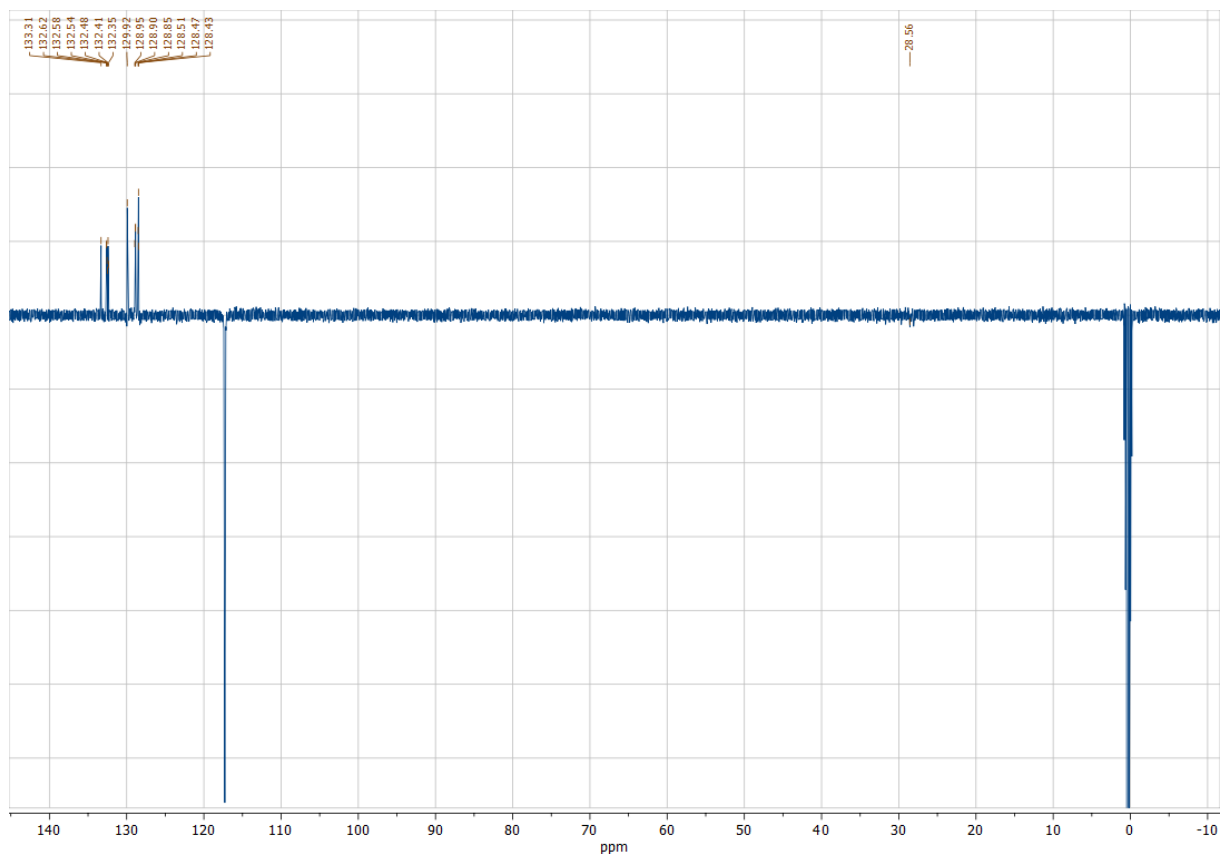

Figure 7  $^{13}\text{C}$ -APT NMR spectrum of  $[(\text{dppm})_2\text{CH}]\text{CuBr}(\text{PF}_6)$  (**2-Br**) in  $\text{CD}_3\text{CN}$ .

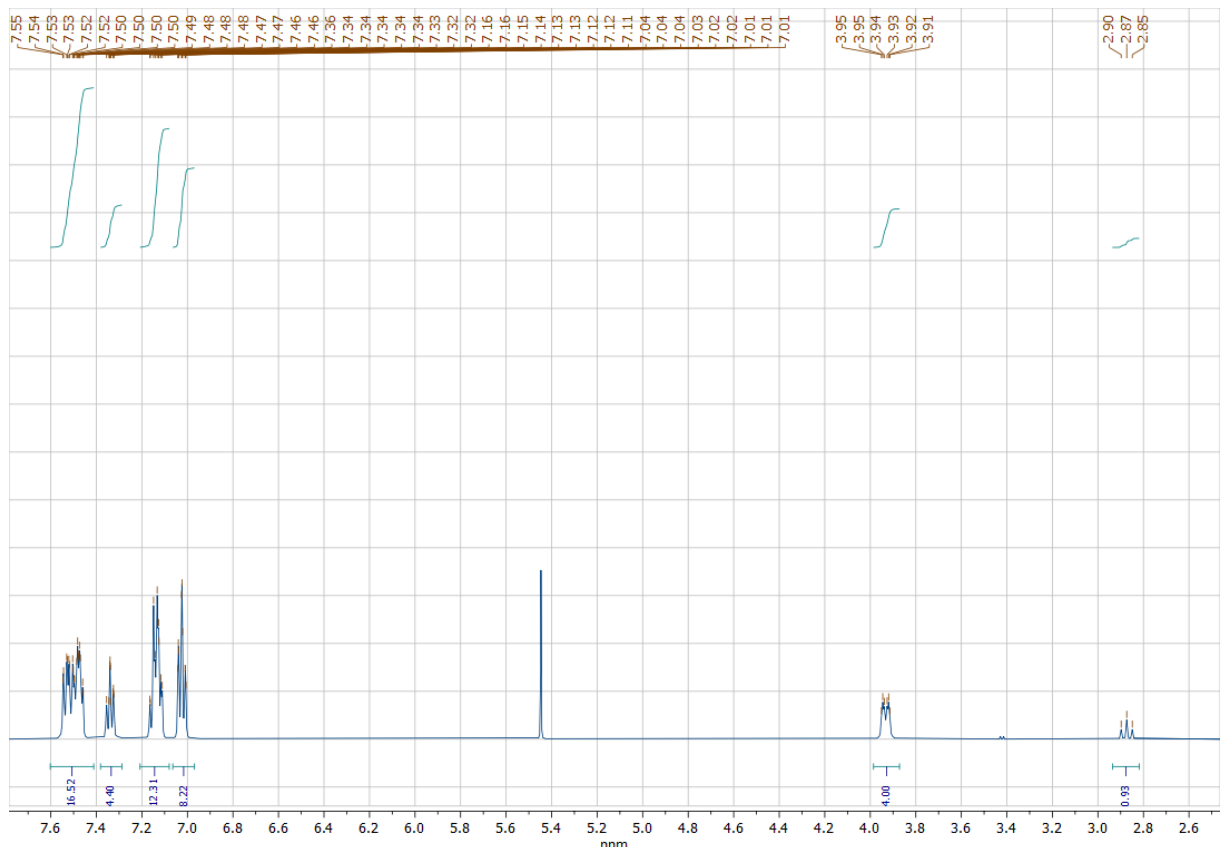

Figure 8  $^1\text{H}$  NMR spectrum of  $[(\text{dppm})_2\text{CH}]\text{CuI}(\text{PF}_6)$  (**2-I**) in  $\text{CD}_3\text{CN}$ .

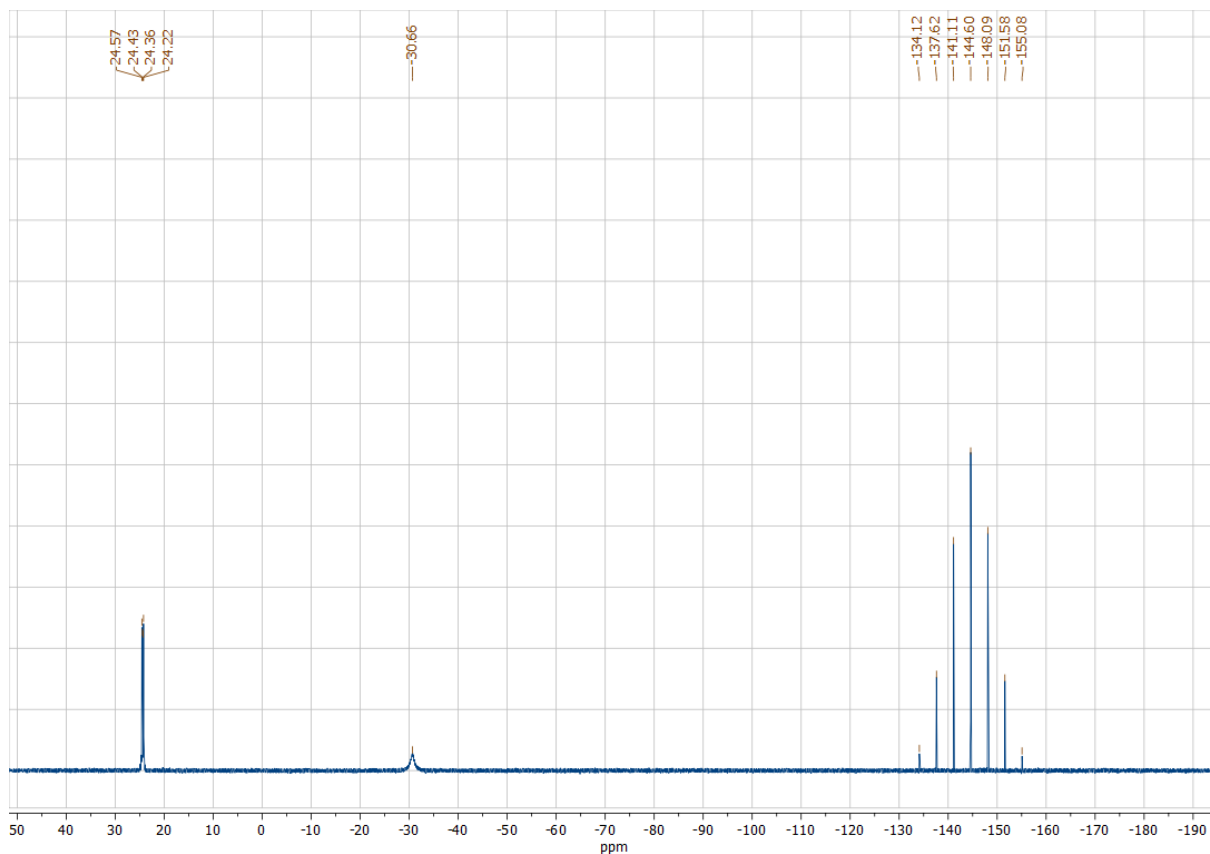

**Figure 9**  $^{31}\text{P}\{^1\text{H}\}$  NMR spectrum of  $[(\text{dppm})_2\text{CH})\text{CuI}](\text{PF}_6)$  (**2-I**) in  $\text{CD}_3\text{CN}$ .

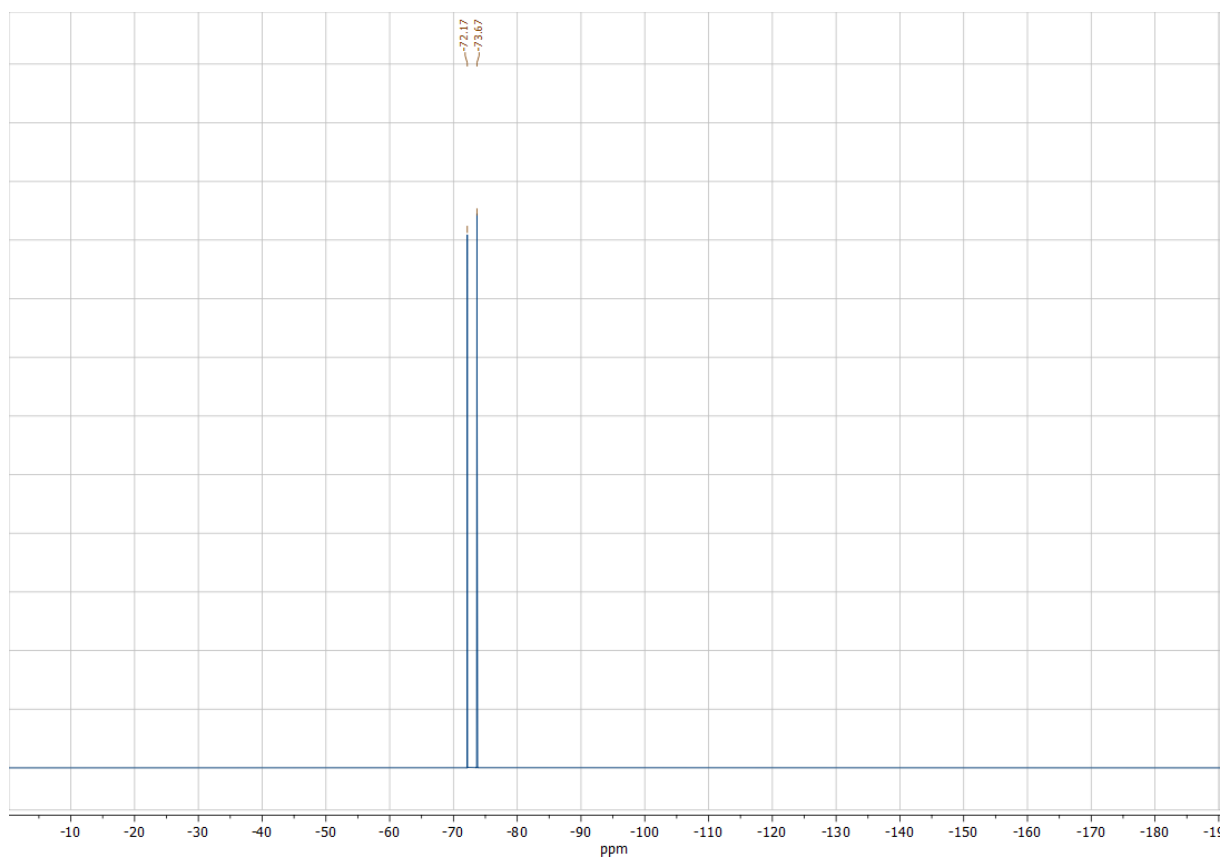

**Figure 10**  $^{19}\text{F}$  NMR spectrum of  $[(\text{dppm})_2\text{CH})\text{CuI}](\text{PF}_6)$  (**2-I**) in  $\text{CD}_3\text{CN}$ .

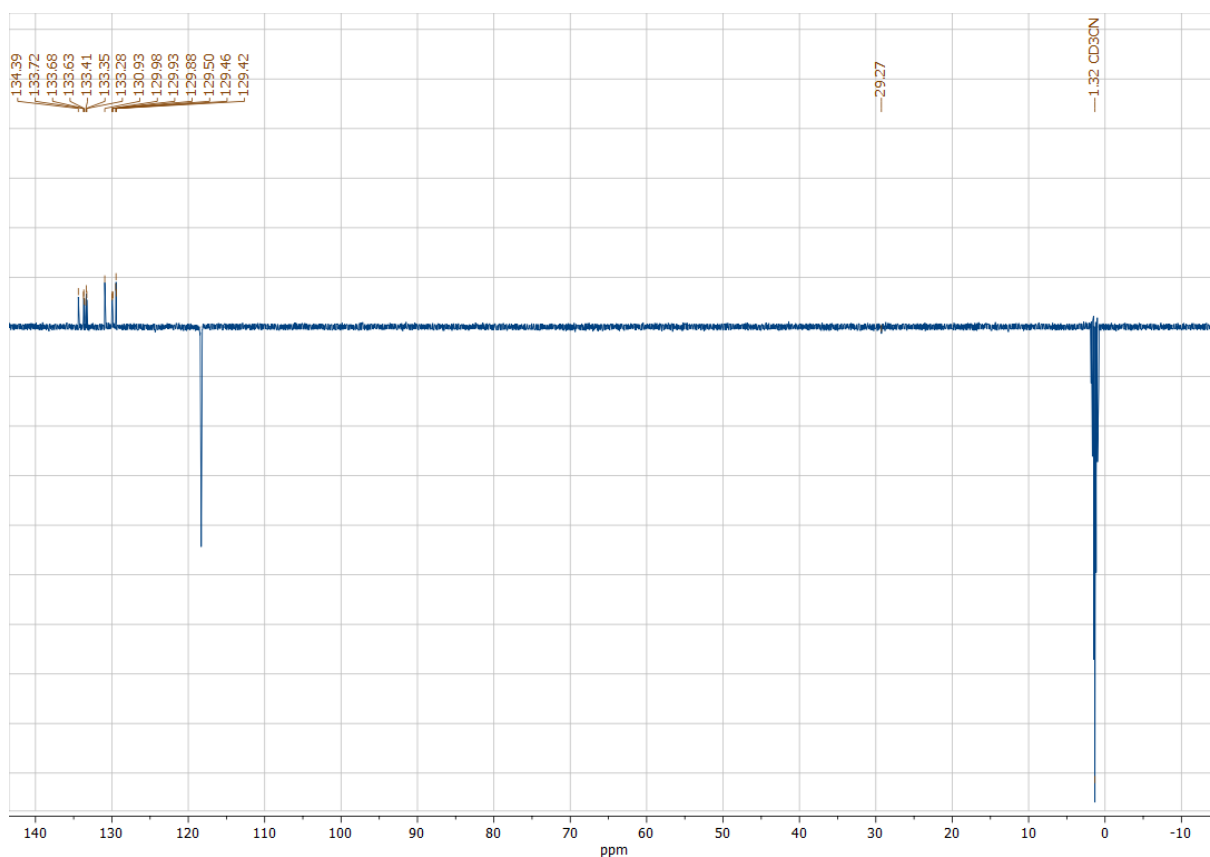

Figure 11  $^{13}\text{C}$ -APT NMR spectrum of  $[(\text{dppm})_2\text{CH}]\text{CuBr}(\text{PF}_6)$  (**2-I**) in  $\text{CD}_3\text{CN}$ .

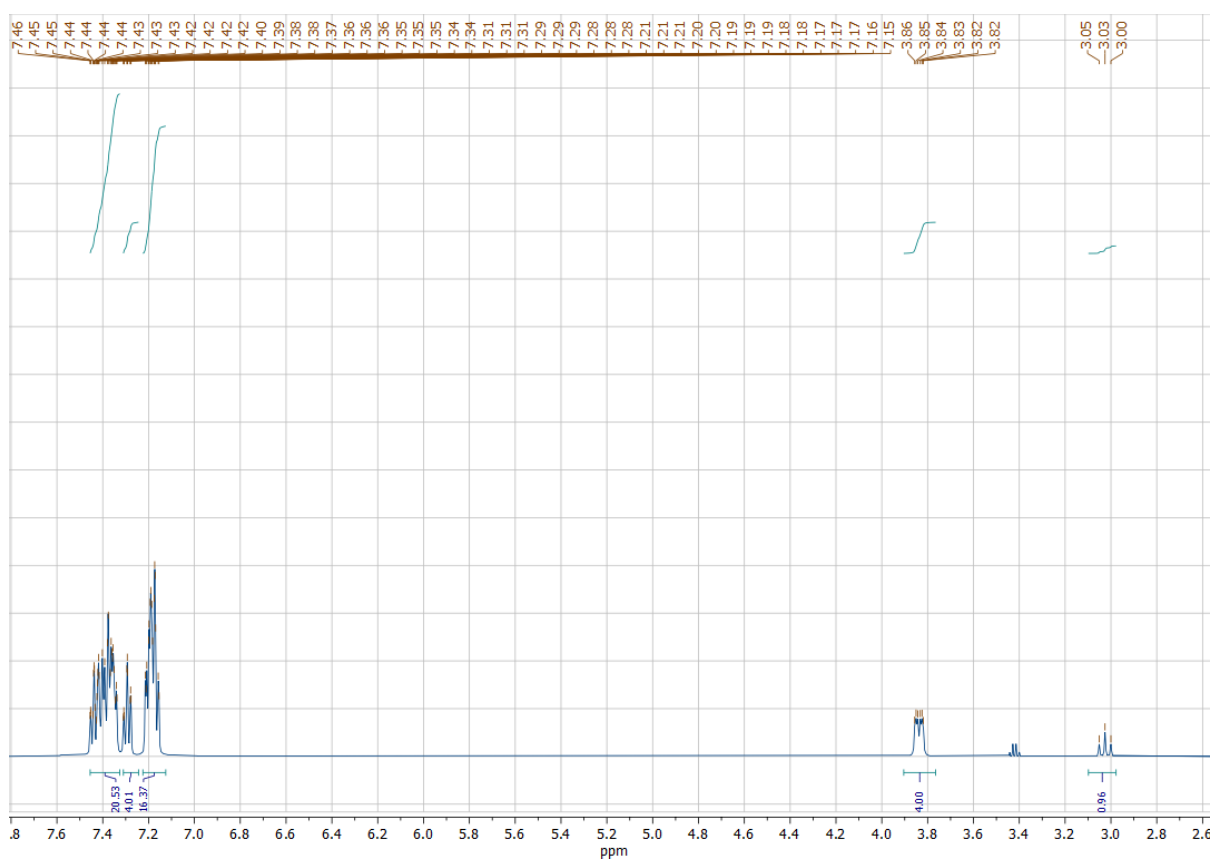

Figure 12  $^1\text{H}$  NMR spectrum of  $[(\text{dppm})_2\text{CH}]\text{Cu}(\text{NCMe})](\text{PF}_6)(\text{BF}_4)$  (**2-MeCN**) in  $\text{CD}_3\text{CN}$ .

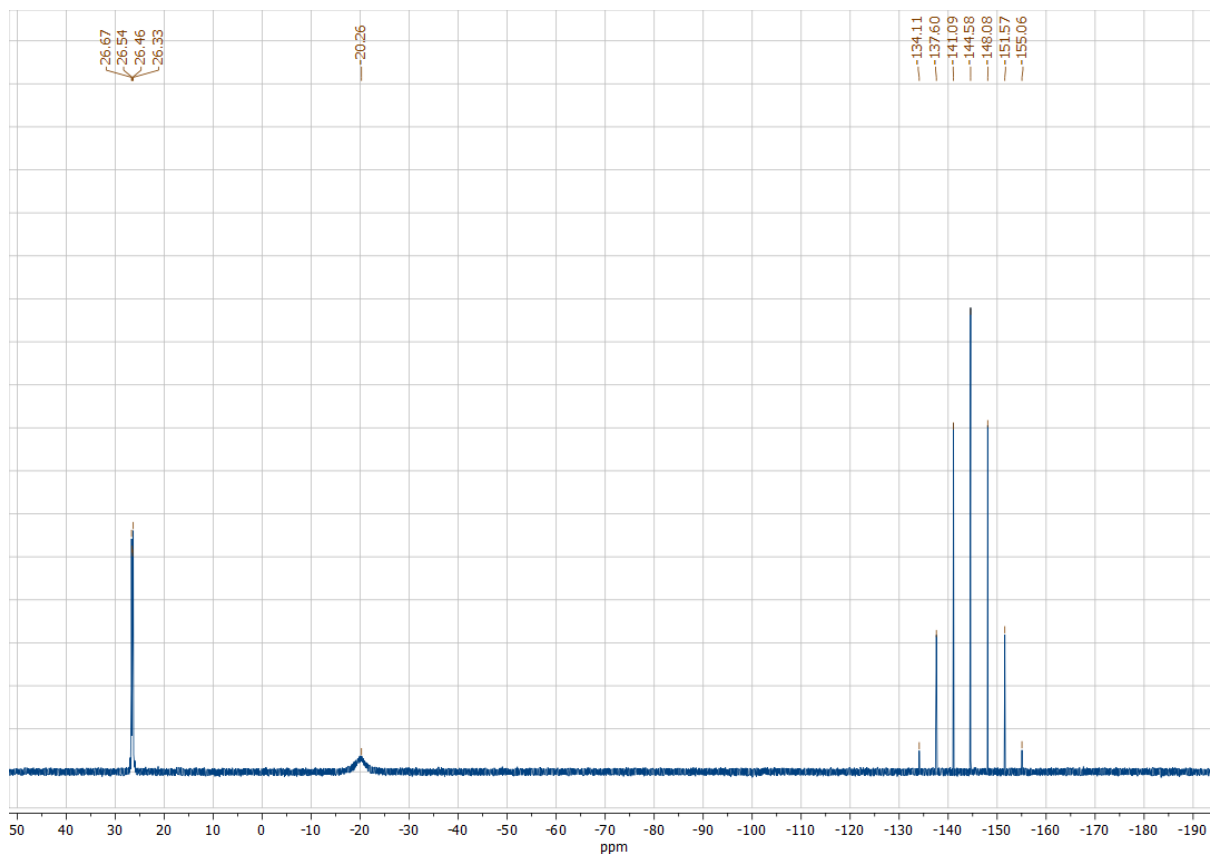

Figure 13  $^{31}\text{P}\{^1\text{H}\}$  NMR spectrum of  $[(\text{dppm})_2\text{CH})\text{Cu}(\text{NCMe})](\text{PF}_6)(\text{BF}_4)$  (2-MeCN) in  $\text{CD}_3\text{CN}$ .

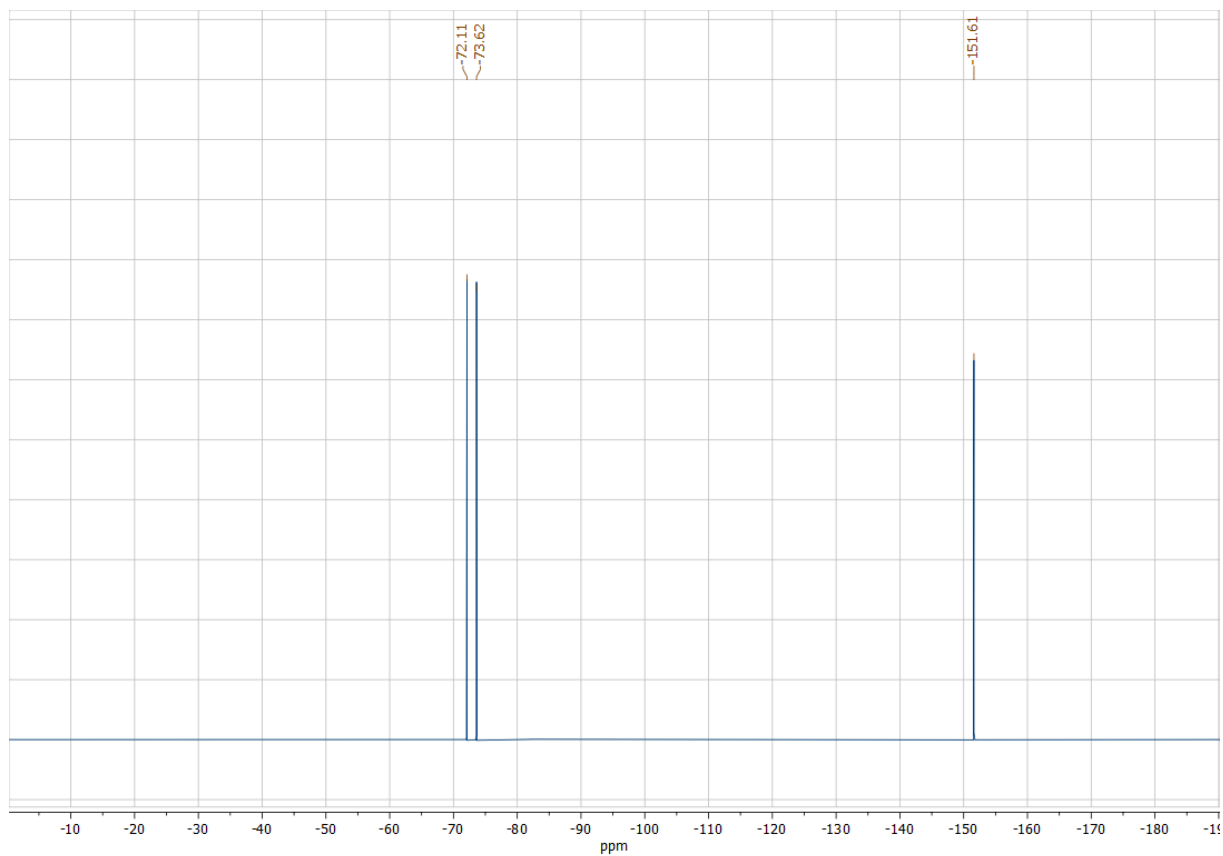

Figure 14  $^{19}\text{F}$  NMR spectrum of  $[(\text{dppm})_2\text{CH})\text{Cu}(\text{NCMe})](\text{PF}_6)(\text{BF}_4)$  (2-MeCN) in  $\text{CD}_3\text{CN}$ .

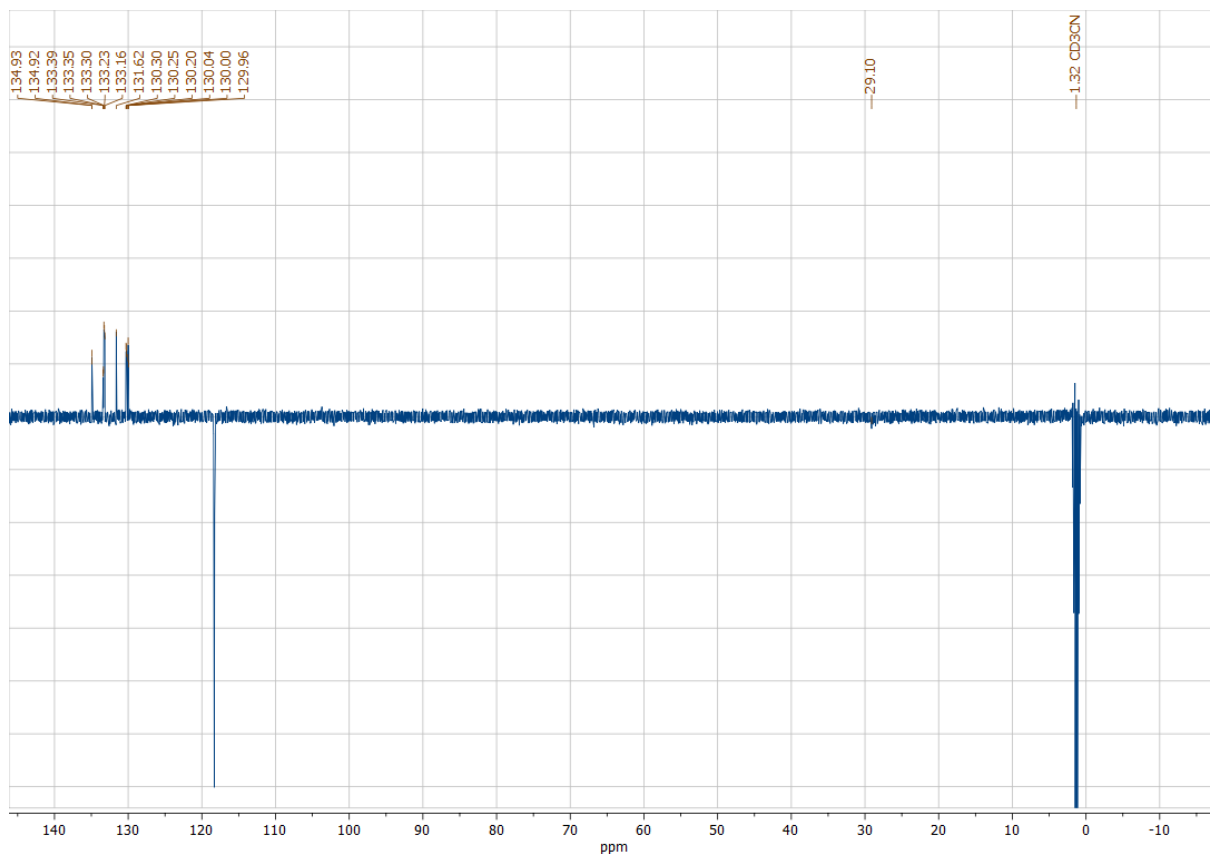

Figure 15  $^{13}\text{C}$ -APT NMR spectrum of  $[(\text{dppm})_2\text{CH}]\text{Cu}(\text{NCMe})(\text{PF}_6)(\text{BF}_4)$  (**2-MeCN**) in  $\text{CD}_3\text{CN}$ .

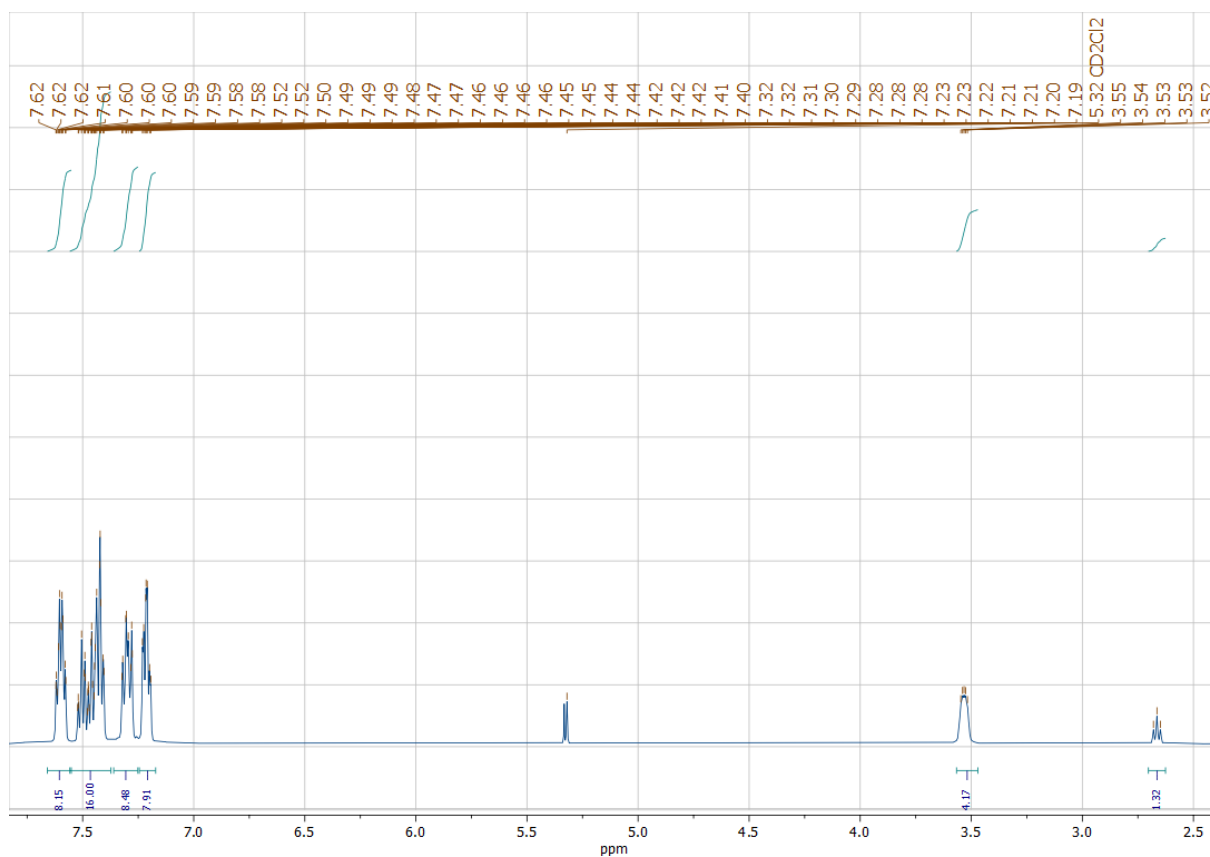

Figure 16  $^1\text{H}$  NMR spectrum of  $[(\text{dppm})_2\text{CH}]\text{Ag}(\text{PF}_6)_2$  (**3**) in  $\text{CD}_2\text{Cl}_2$ .



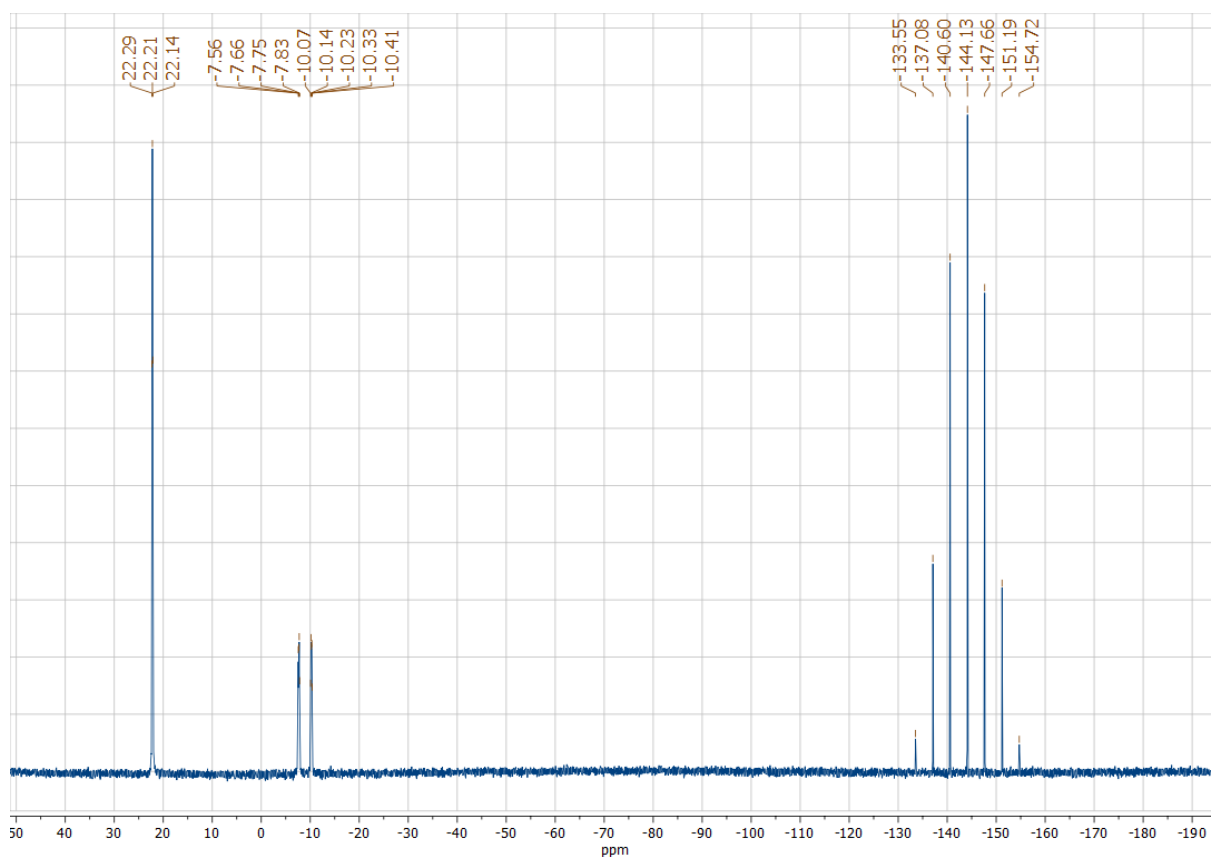

Figure 17  $^{31}\text{P}\{^1\text{H}\}$  NMR spectrum of  $[(\text{dppm})_2\text{CH})\text{Ag}](\text{PF}_6)_2$  (**3**) in  $\text{CD}_2\text{Cl}_2$ .

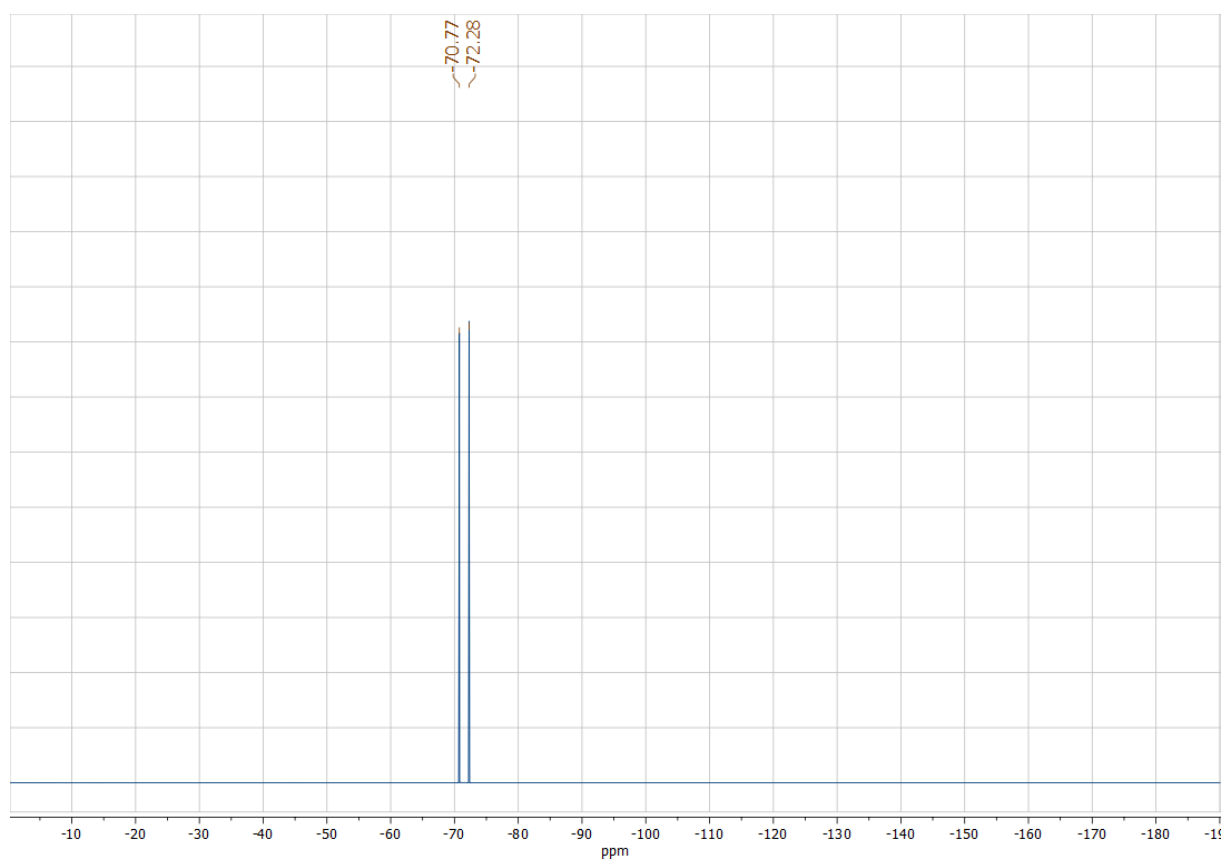

Figure 18  $^{19}\text{F}$  NMR spectrum of  $[(\text{dppm})_2\text{CH})\text{Ag}](\text{PF}_6)_2$  (**3**) in  $\text{CD}_2\text{Cl}_2$ .

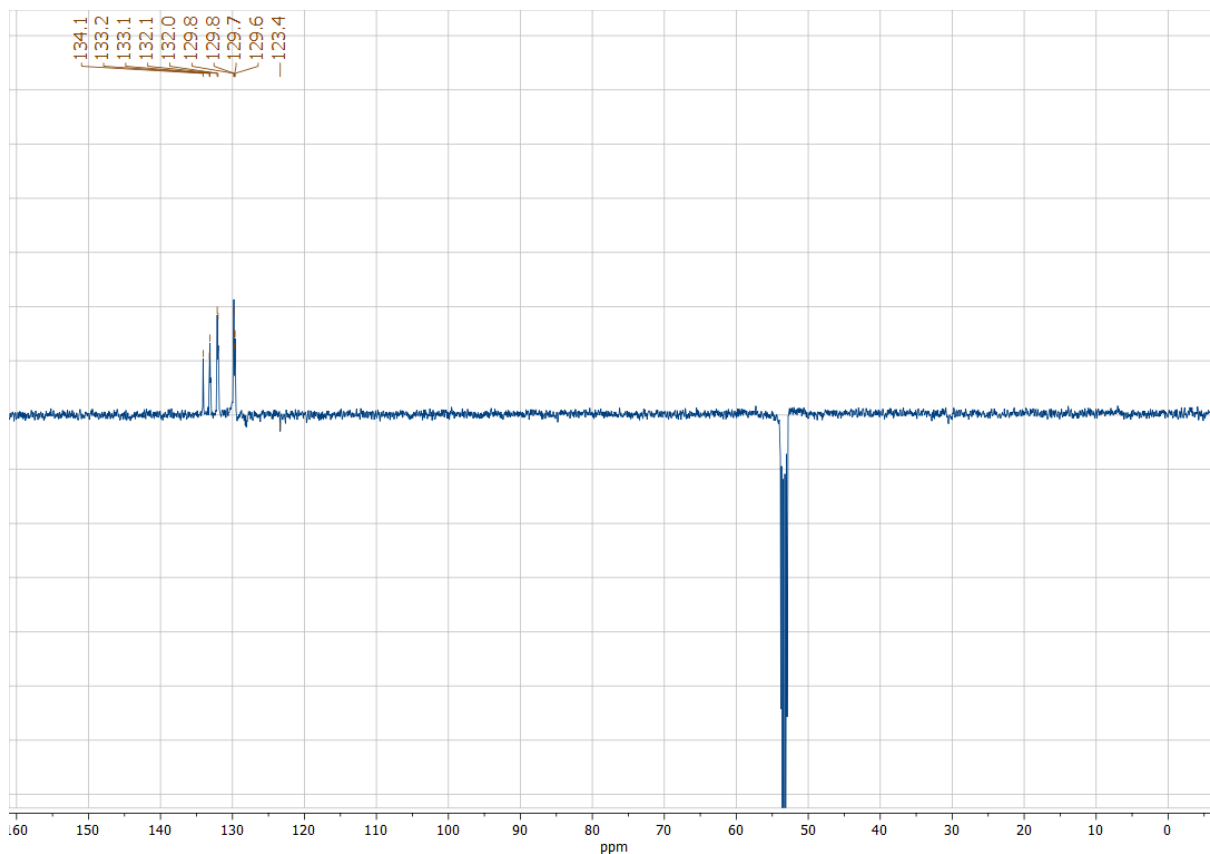

Figure 19  $^{13}\text{C}$ -APT NMR spectrum of  $[(\text{dppm})_2\text{CH}]\text{Ag}^+(\text{PF}_6)_2^-$  (**3**) in  $\text{CD}_2\text{Cl}_2$ .

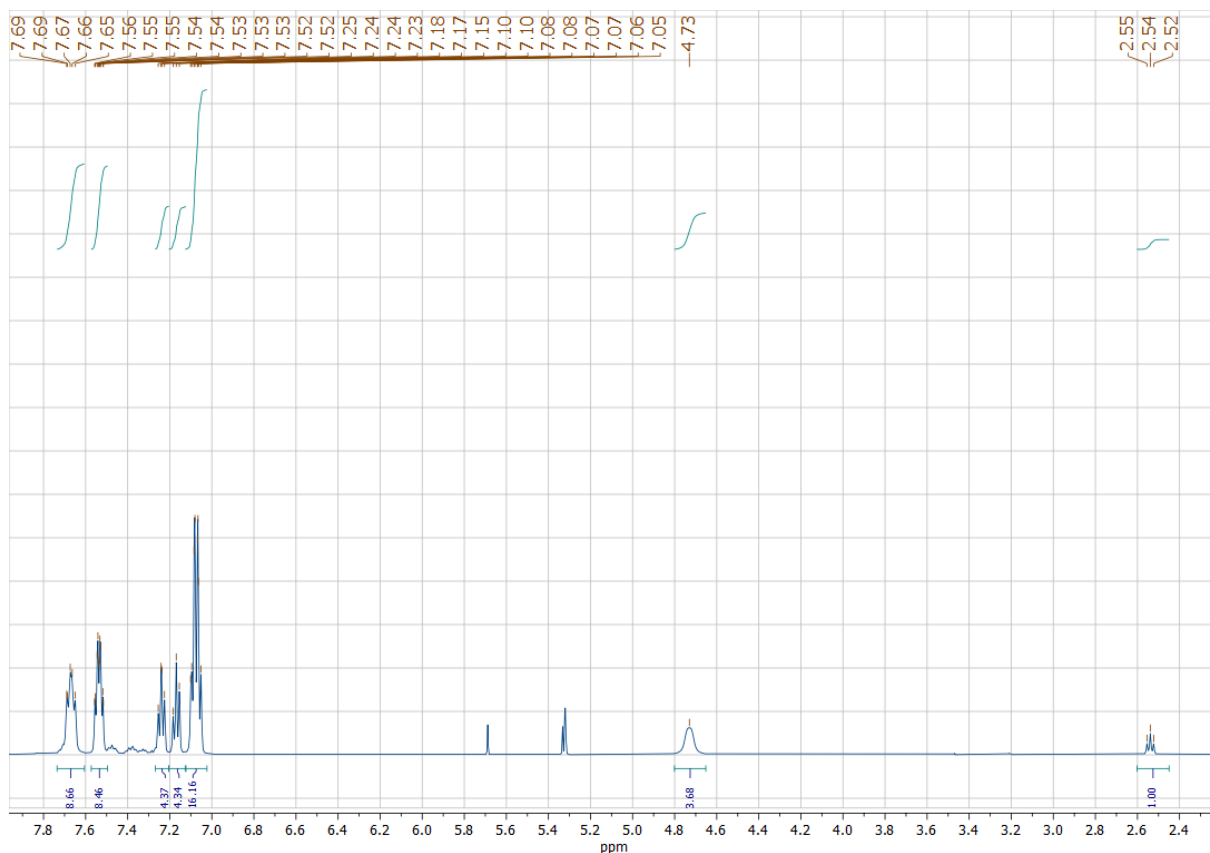

Figure 20  $^1\text{H}$  NMR spectrum of  $[(\text{dppm})_2\text{CH}]\text{AgCl}(\text{NO}_3)$  (**3-Cl**) in  $\text{CD}_2\text{Cl}_2$ .

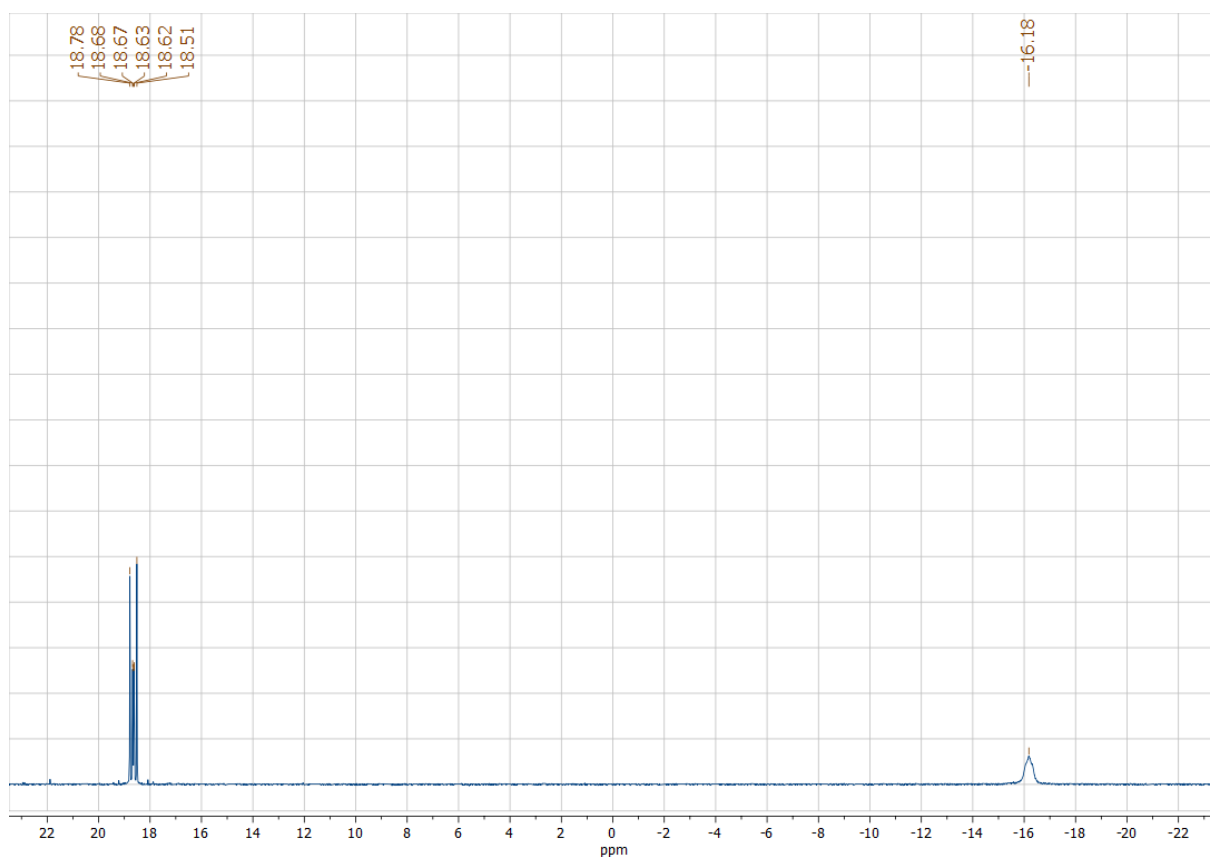

Figure 21  $^{31}\text{P}\{^1\text{H}\}$  NMR spectrum of  $[(\text{dppm})_2\text{CH})\text{AgCl}](\text{NO}_3)$  (**3-Cl**) in  $\text{CD}_2\text{Cl}_2$ .

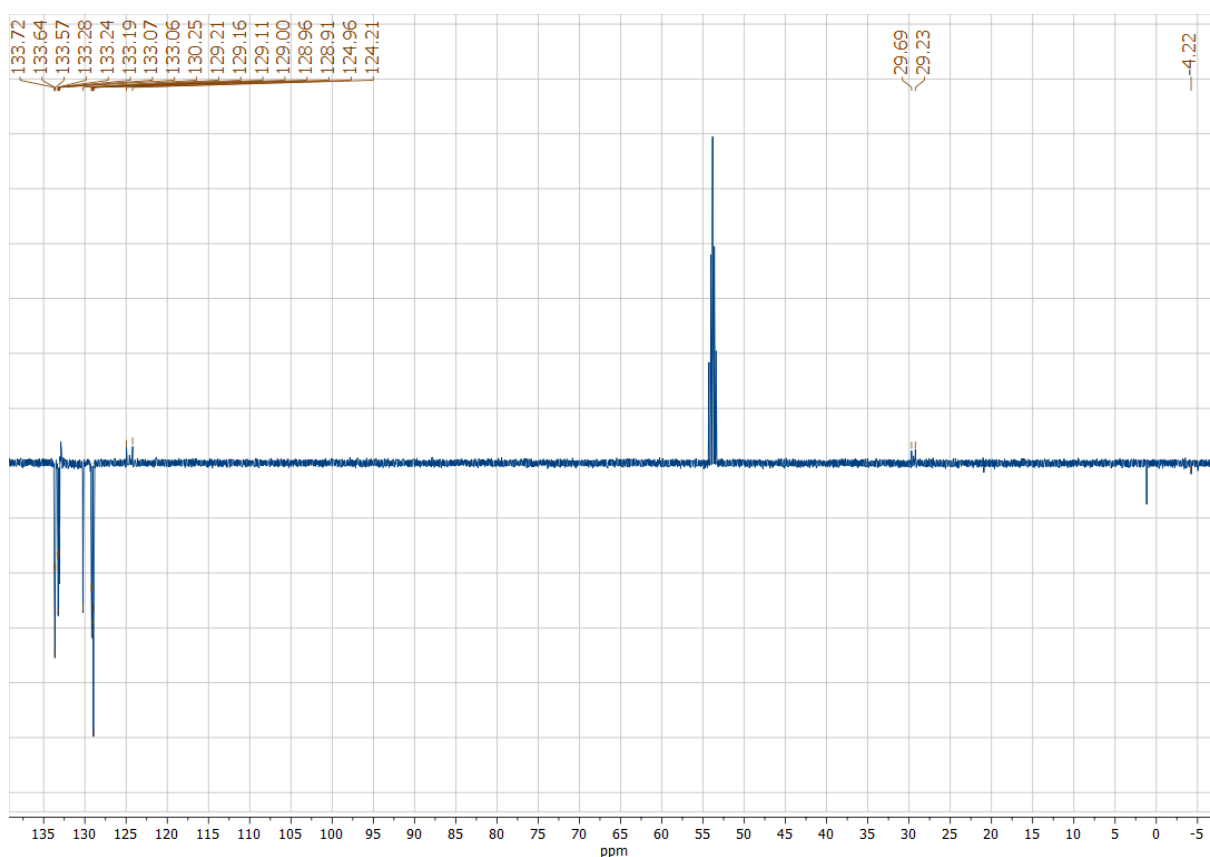

Figure 22  $^{13}\text{C}$ -APT NMR spectrum of  $[(\text{dppm})_2\text{CH})\text{AgCl}](\text{NO}_3)$  (**3-Cl**) in  $\text{CD}_2\text{Cl}_2$ .

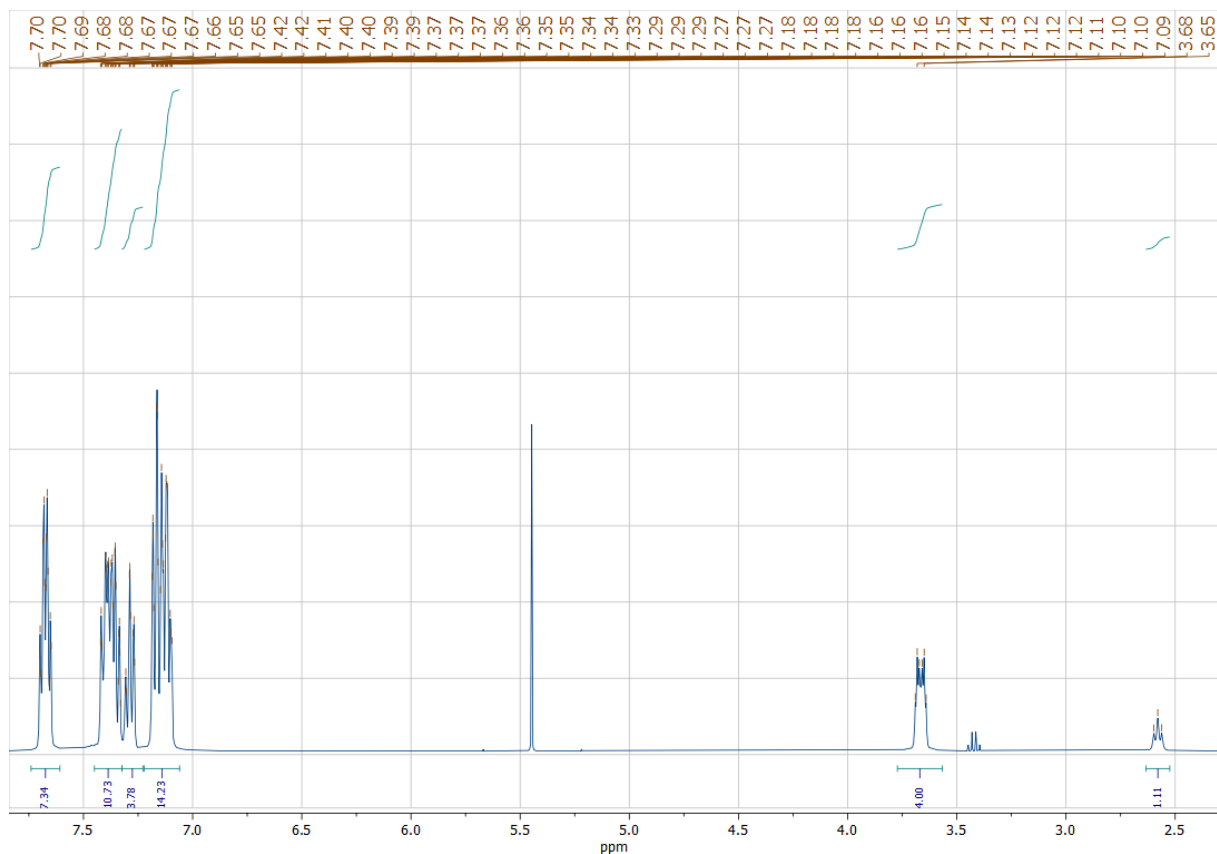

Figure 23  $^1\text{H}$  NMR spectrum of  $[(\text{dppm})_2\text{CH}]\text{AgBr}(\text{PF}_6)$  (**3-Br**) in  $\text{CD}_3\text{CN}$ .

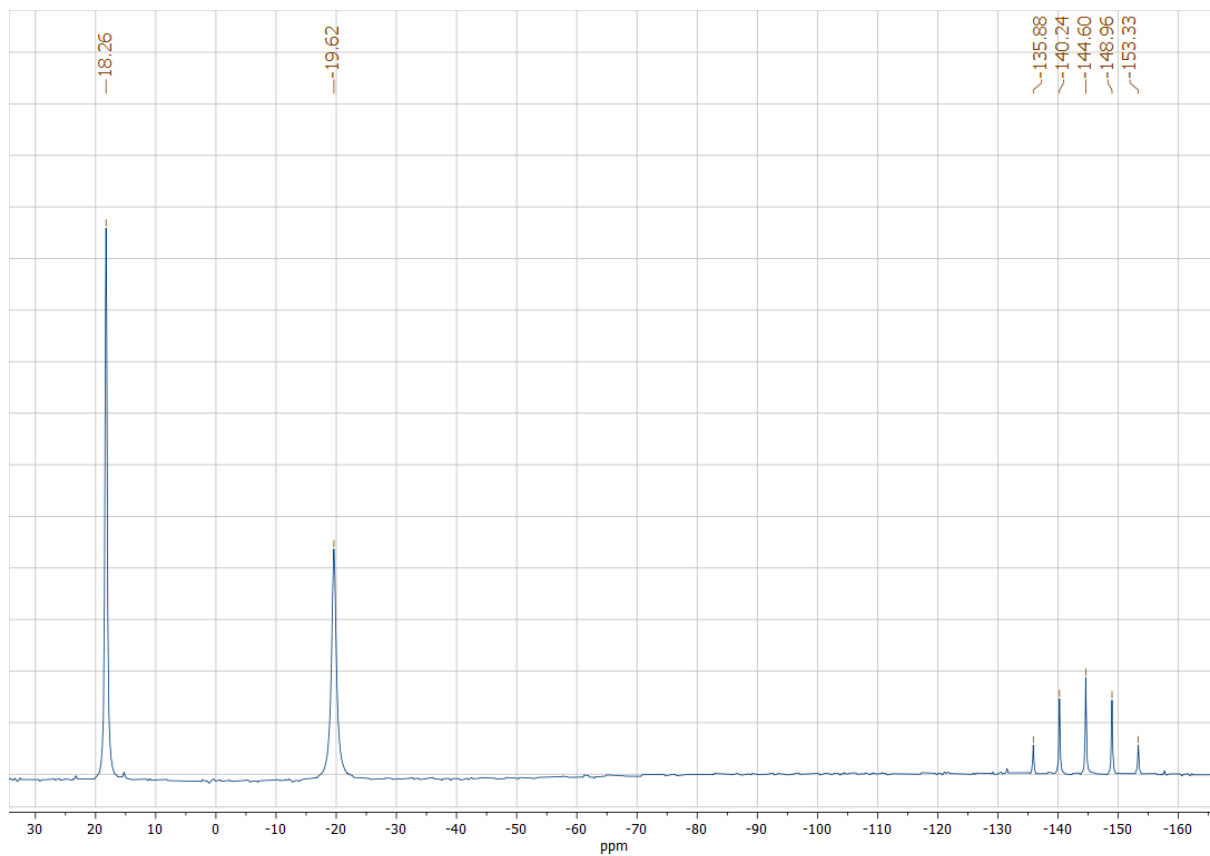

Figure 24  $^{31}\text{P}\{^1\text{H}\}$  NMR spectrum of  $[(\text{dppm})_2\text{CH}]\text{AgBr}(\text{PF}_6)$  (**3-Br**) in  $\text{CD}_3\text{CN}$ .

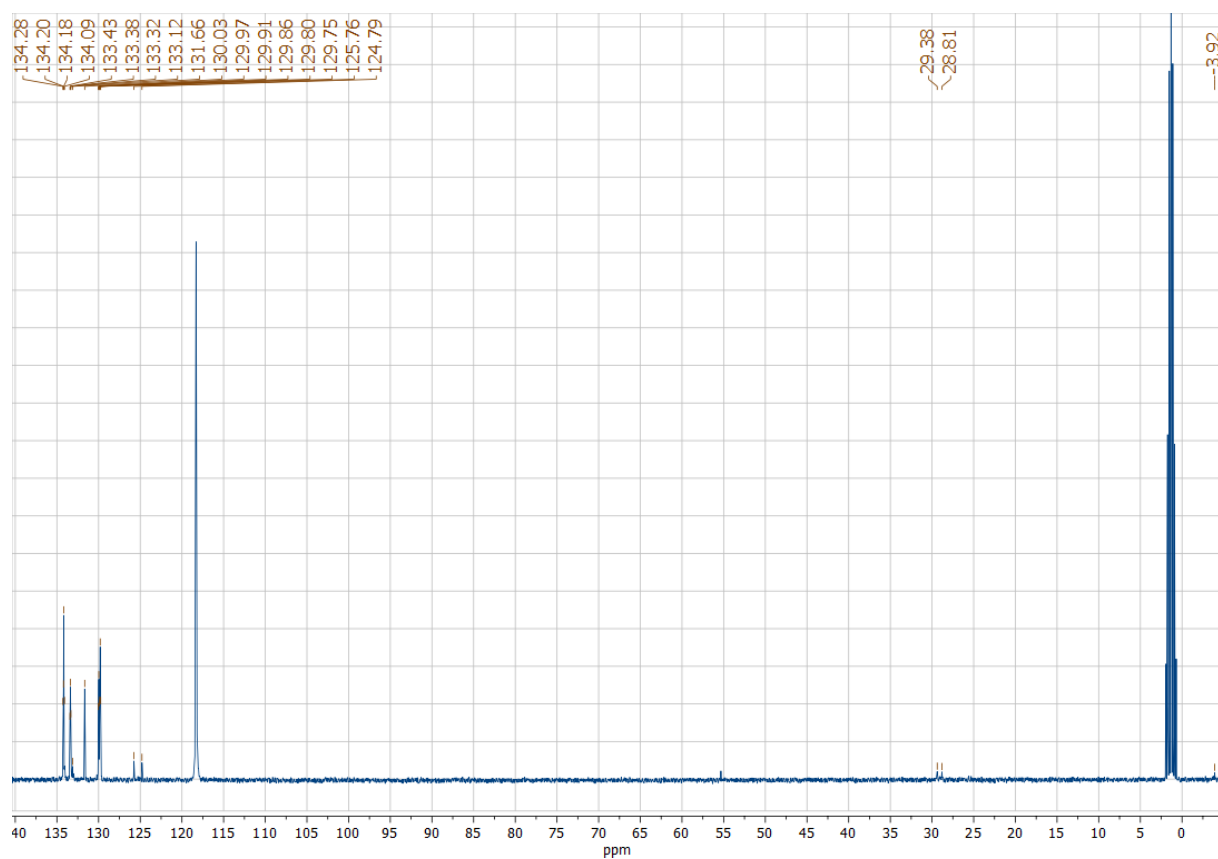

Figure 25  $^{13}\text{C}$ -APT NMR spectrum of  $[(\text{dppm})_2\text{CH}]\text{AgBr}(\text{PF}_6)$  (**3-Br**) in  $\text{CD}_3\text{CN}$ .

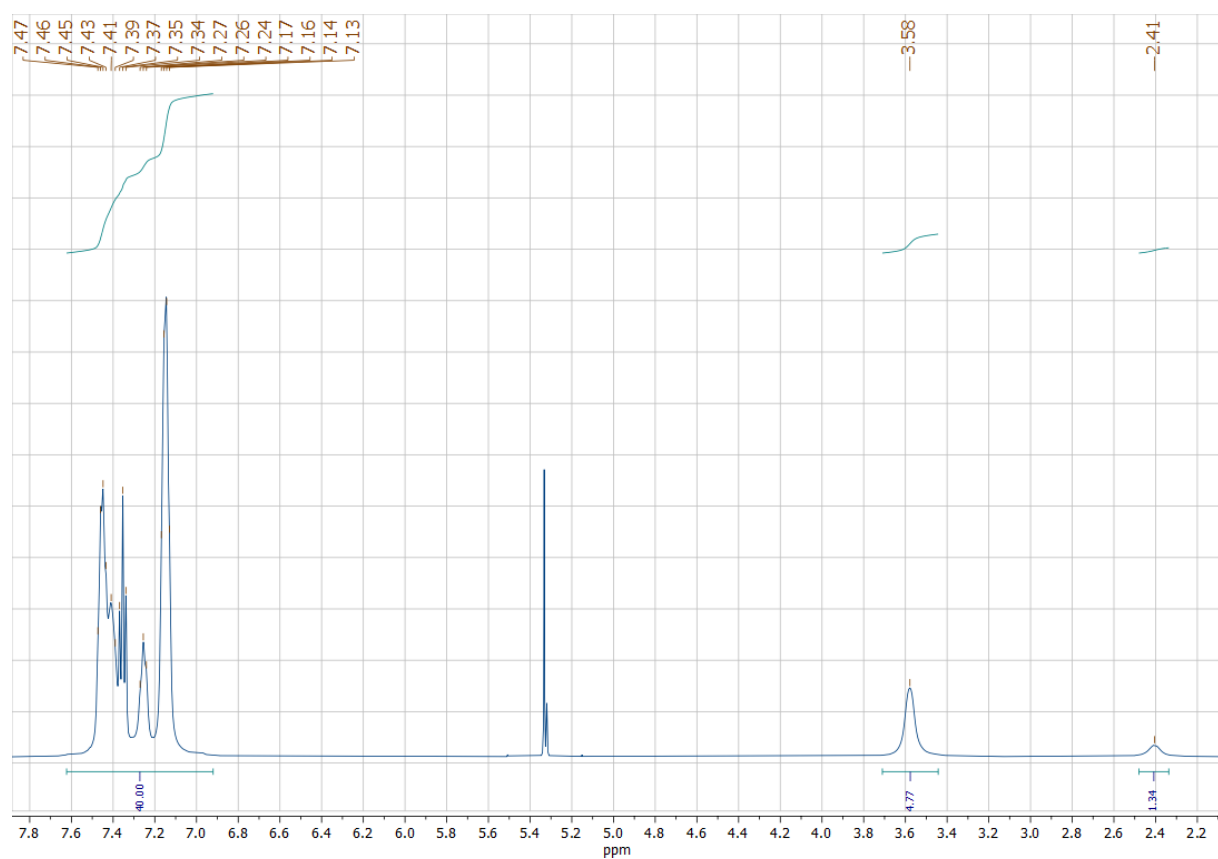

Figure 26  $^1\text{H}$  NMR spectrum of  $[(\text{dppm})_2\text{CH}]\text{AgI}(\text{PF}_6)$  (**3-I**) in  $\text{CD}_2\text{Cl}_2$ .

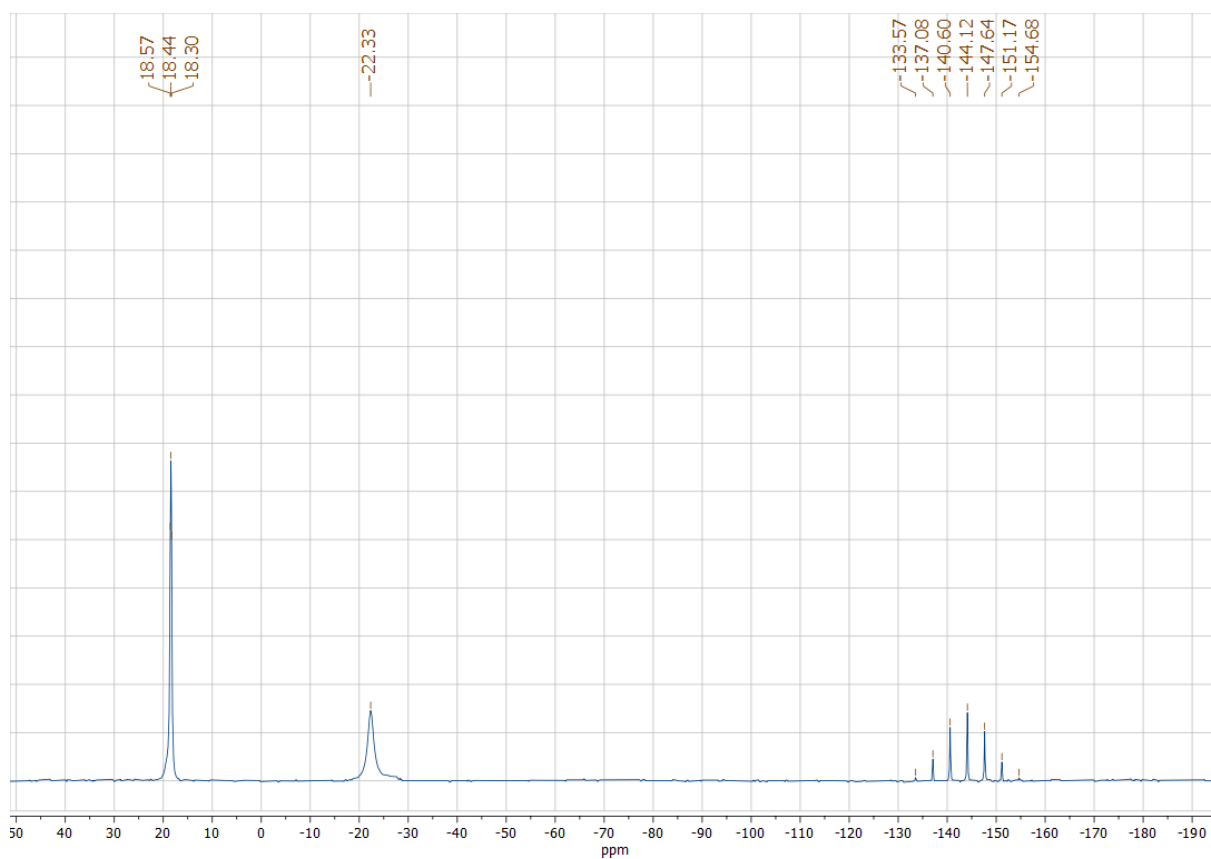

**Figure 27**  $^{31}\text{P}\{^1\text{H}\}$  NMR spectrum of  $[(\text{dppm})_2\text{CH}]\text{AgI}(\text{PF}_6)$  (**3-I**) in  $\text{CD}_2\text{Cl}_2$ .

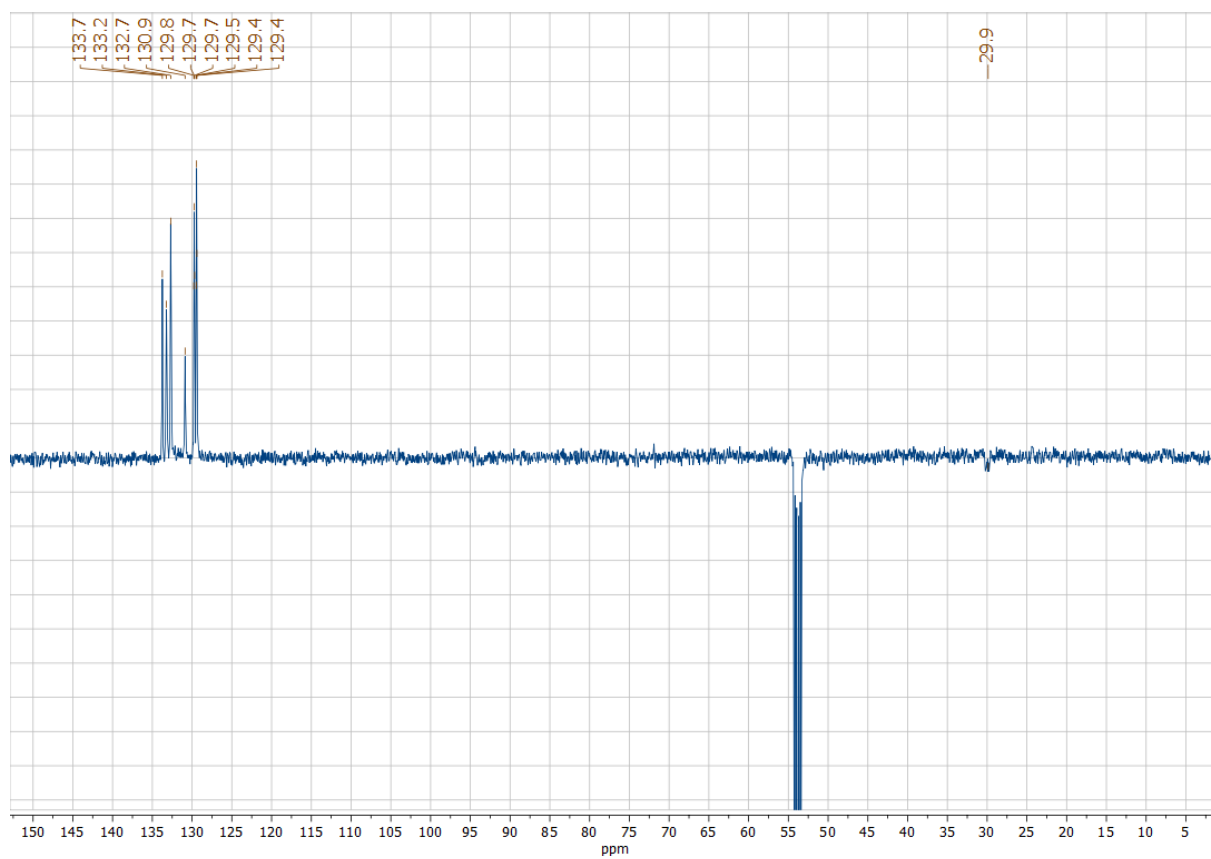

**Figure 28**  $^{13}\text{C}$ -APT NMR spectrum of  $[(\text{dppm})_2\text{CH}]\text{AgI}(\text{PF}_6)$  (**3-I**) in  $\text{CD}_2\text{Cl}_2$ .

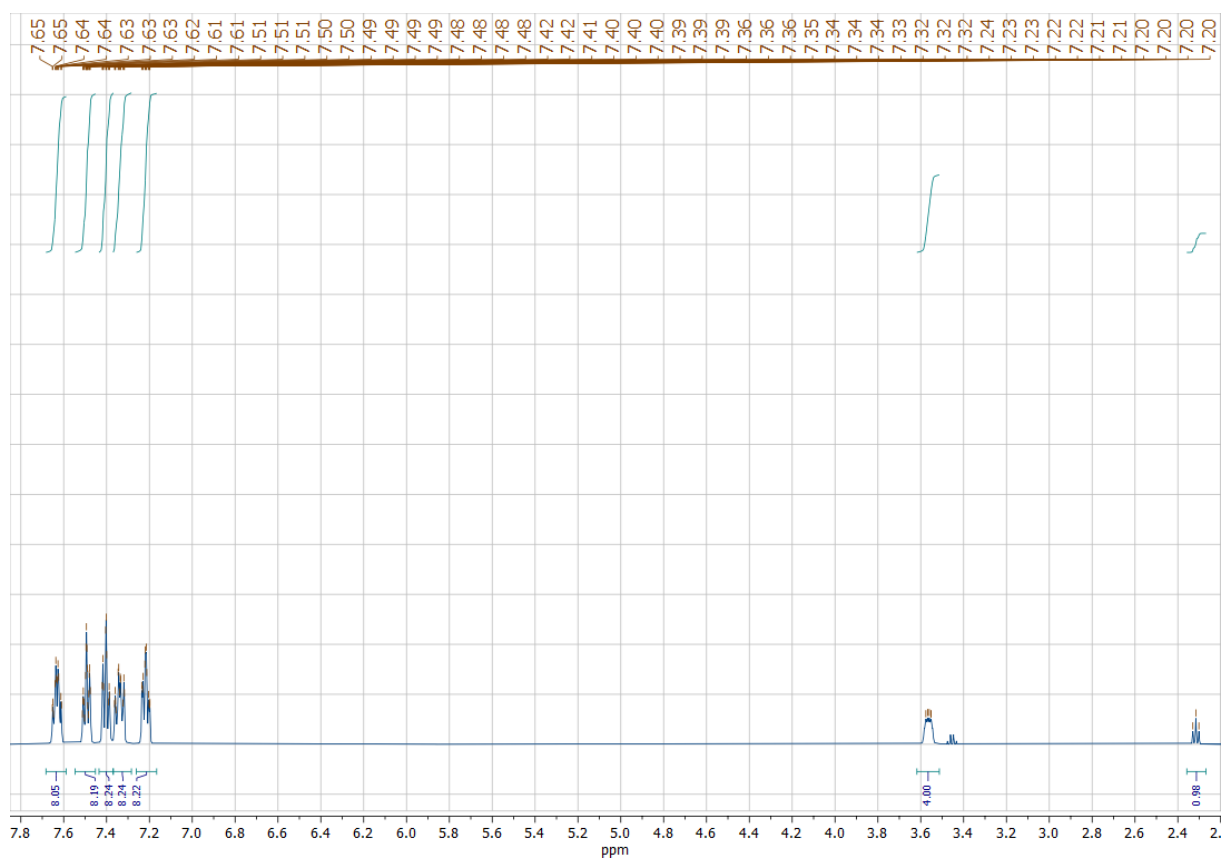

Figure 29  $^1\text{H}$  NMR spectrum of  $[(\text{dppm})_2\text{CH}]\text{Ag}(\text{NCMe})(\text{PF}_6)_2$  (**3-NCMe**) in  $\text{CD}_3\text{CN}$ .

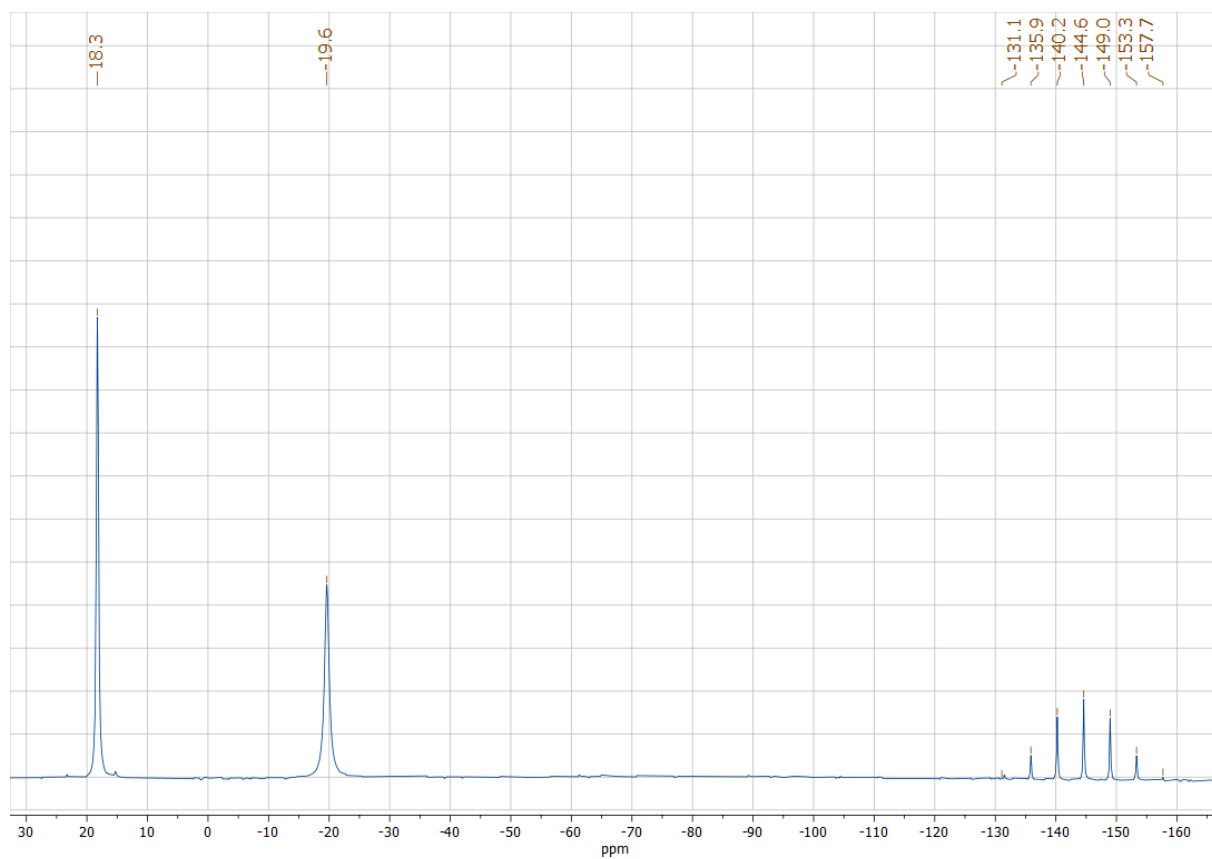

Figure 30  $^{31}\text{P}\{^1\text{H}\}$  NMR spectrum of  $[(\text{dppm})_2\text{CH}]\text{Ag}(\text{NCMe})(\text{PF}_6)_2$  (**3-NCMe**) in  $\text{CD}_3\text{CN}$ .

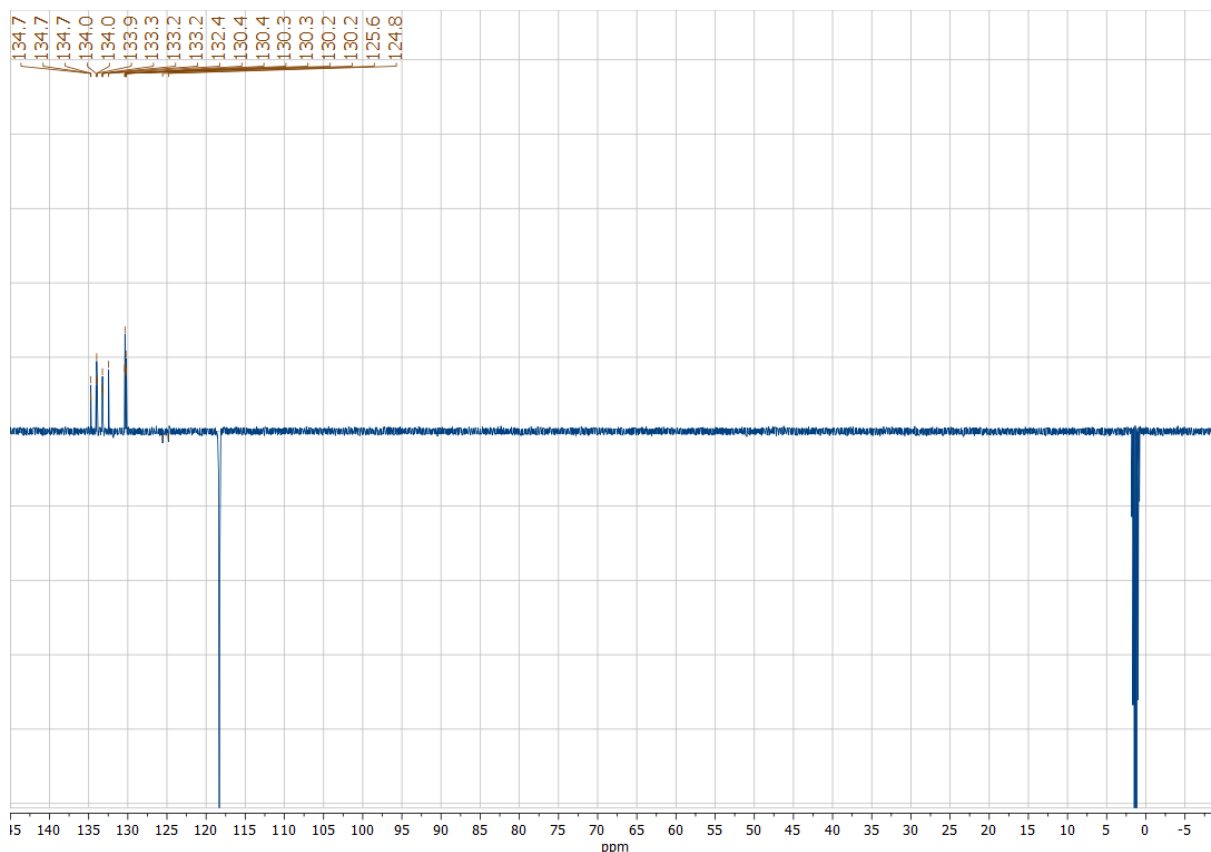

Figure 31  $^{13}\text{C}$ -APT NMR spectrum of  $[(\text{dppm})_2\text{CH})\text{Ag}(\text{NCMe})](\text{PF}_6)_2$  (**3-NCMe**) in  $\text{CD}_3\text{CN}$ .

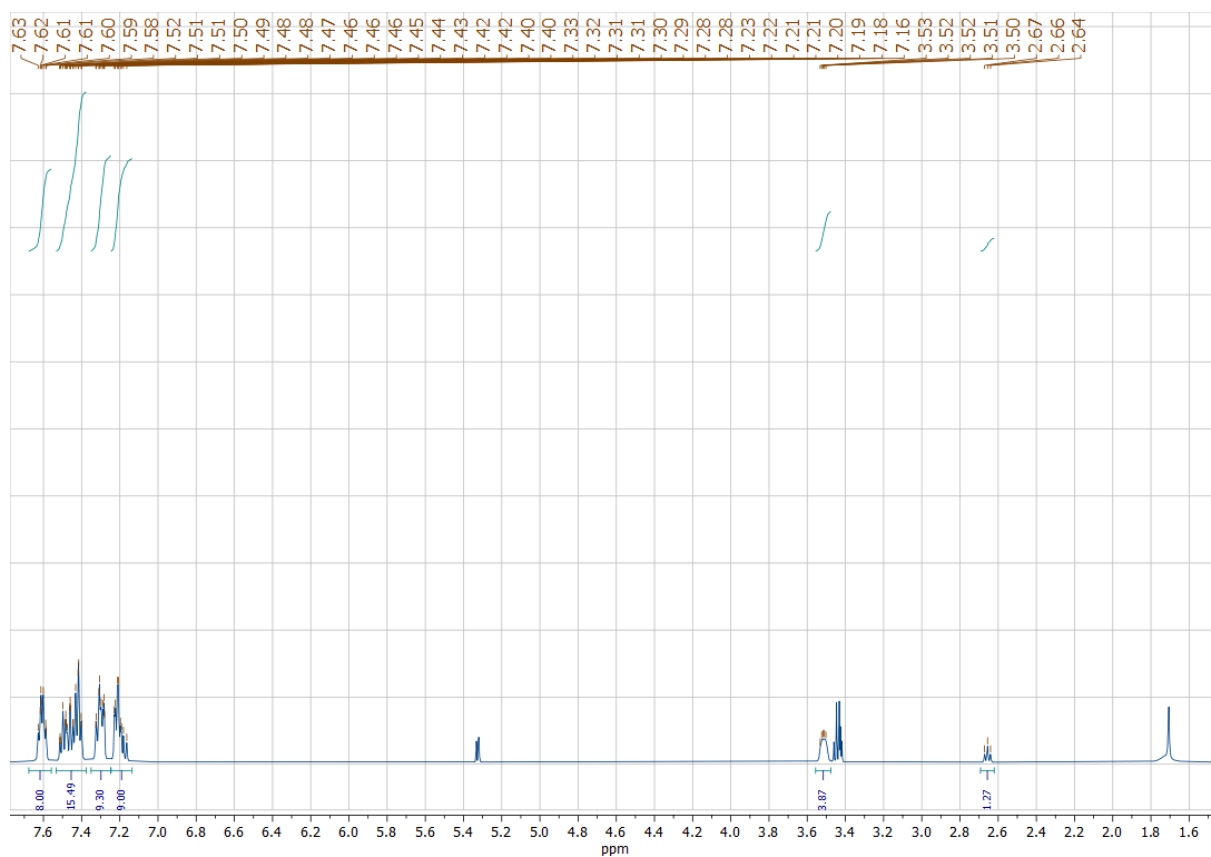

Figure 32  $^1\text{H}$  NMR spectrum of  $[(\text{dppm})_2\text{CH})\text{Ag}(\text{H}_2\text{O})](\text{PF}_6)_2$  (**3-H<sub>2</sub>O**) in  $\text{CD}_2\text{Cl}_2$ .



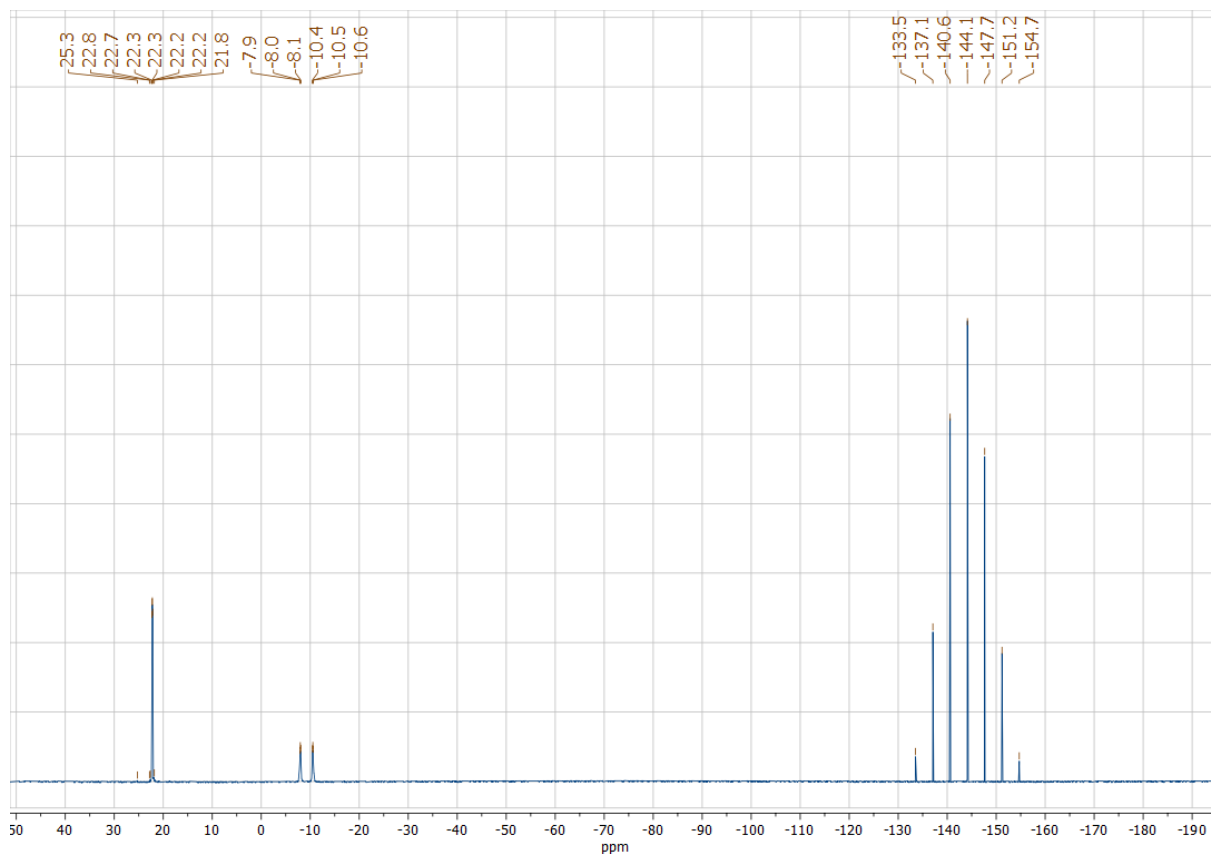

Figure 33  $^{31}\text{P}\{^1\text{H}\}$  NMR spectrum of  $[(\text{dppm})_2\text{CH})\text{Ag}(\text{H}_2\text{O})](\text{PF}_6)_2$  (**3-H<sub>2</sub>O**) in  $\text{CD}_2\text{Cl}_2$ .

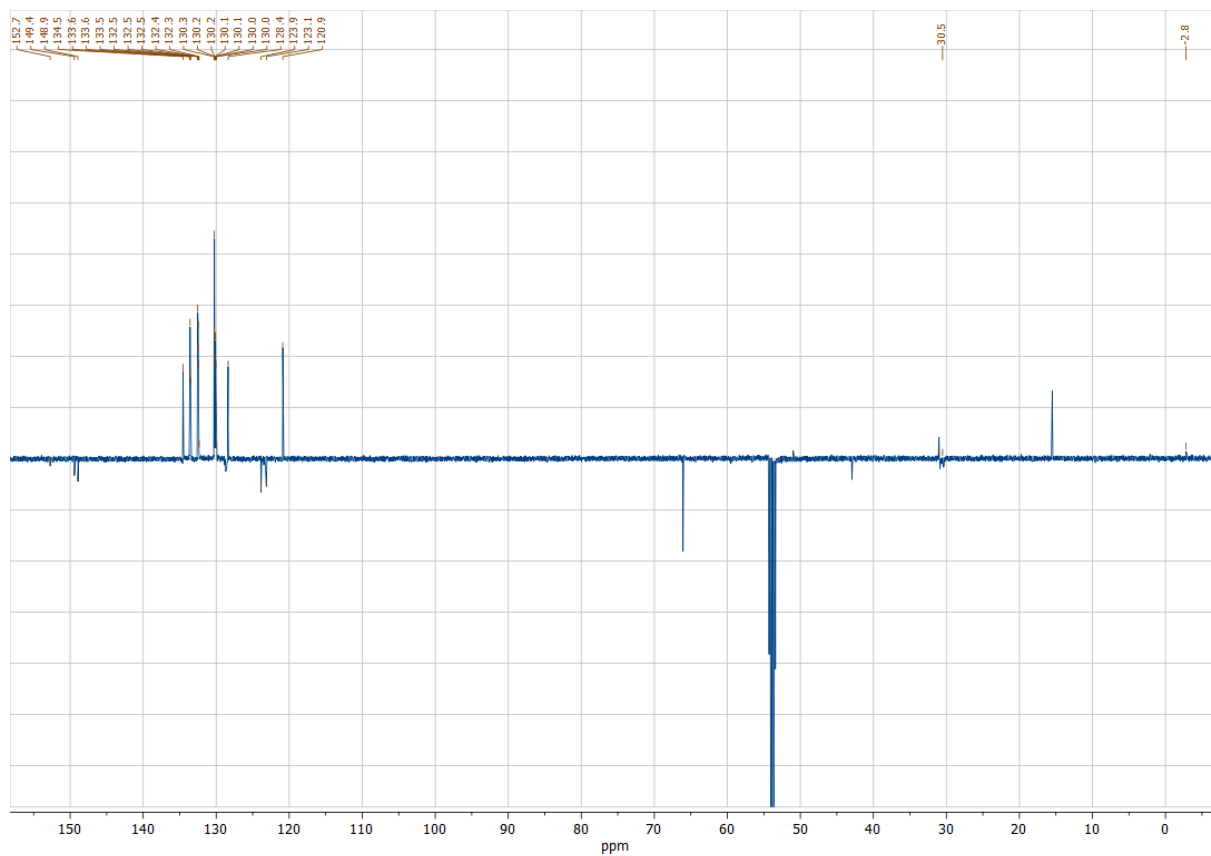

Figure 34  $^{13}\text{C}$ -APT NMR spectrum of  $[(\text{dppm})_2\text{CH})\text{Ag}(\text{H}_2\text{O})](\text{PF}_6)_2$  (**3-H<sub>2</sub>O**) in  $\text{CD}_2\text{Cl}_2$ .

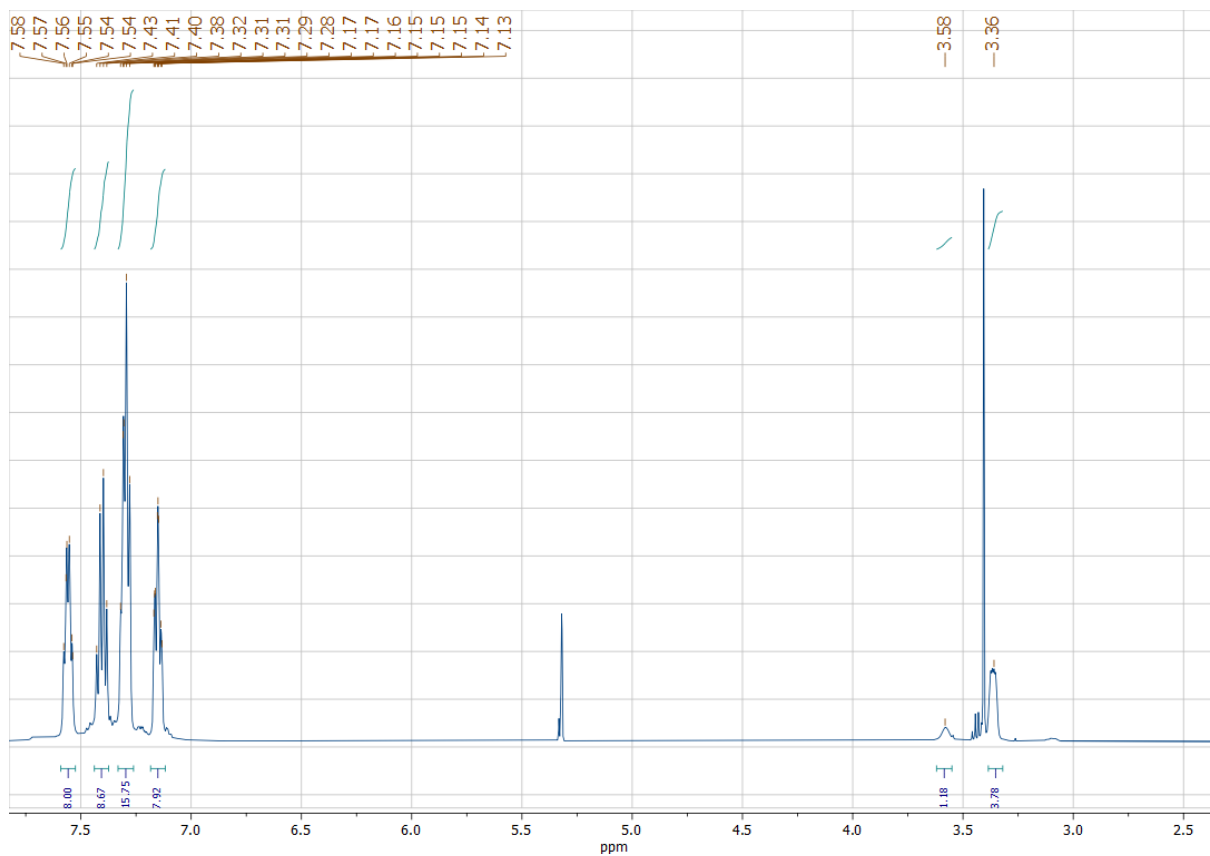

Figure 35  $^1\text{H}$  NMR spectrum of  $[(\text{dppm})_2\text{CH}]\text{Ag}(\text{NO}_3)(\text{PF}_6)$  (**3-NO<sub>3</sub>**) in  $\text{CD}_2\text{Cl}_2$ .

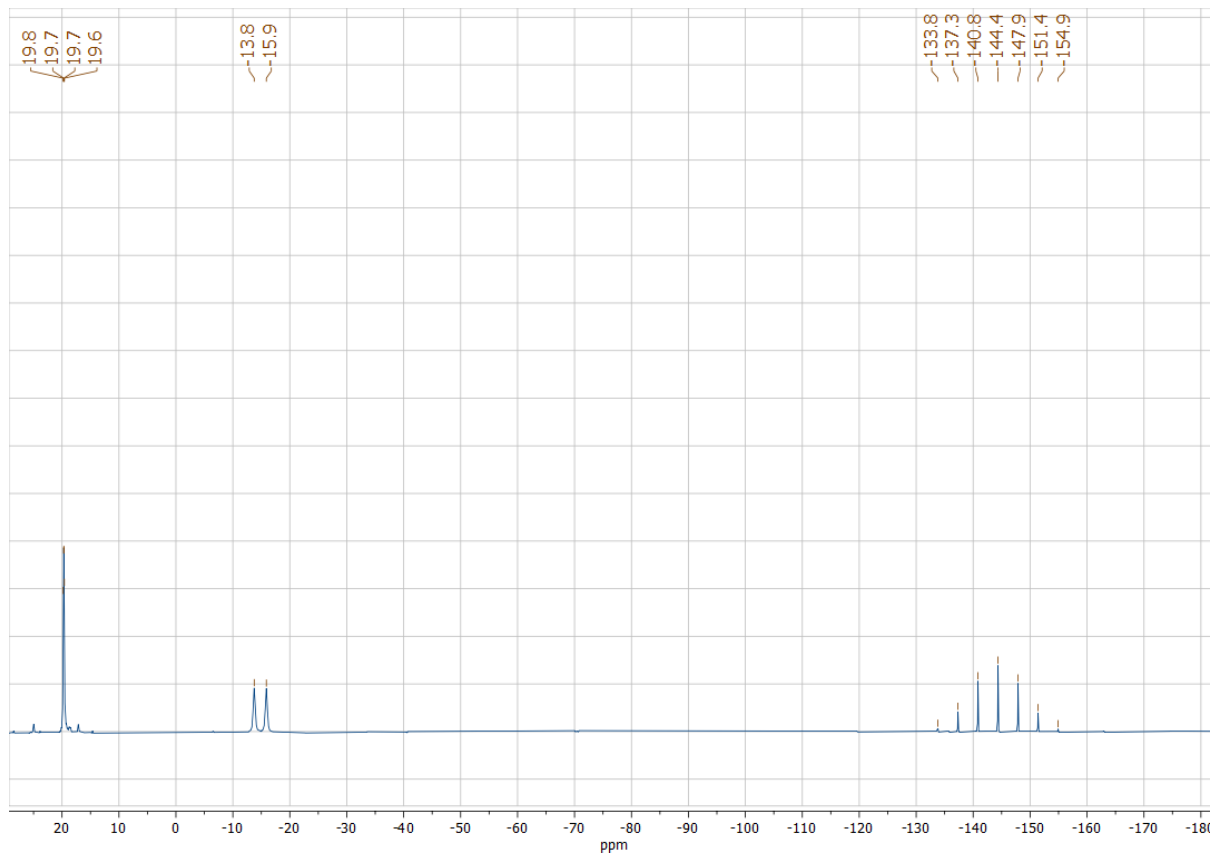

Figure 36  $^{31}\text{P}\{^1\text{H}\}$  NMR spectrum of  $[(\text{dppm})_2\text{CH}]\text{Ag}(\text{NO}_3)(\text{PF}_6)$  (**3-NO<sub>3</sub>**) in  $\text{CD}_2\text{Cl}_2$ .

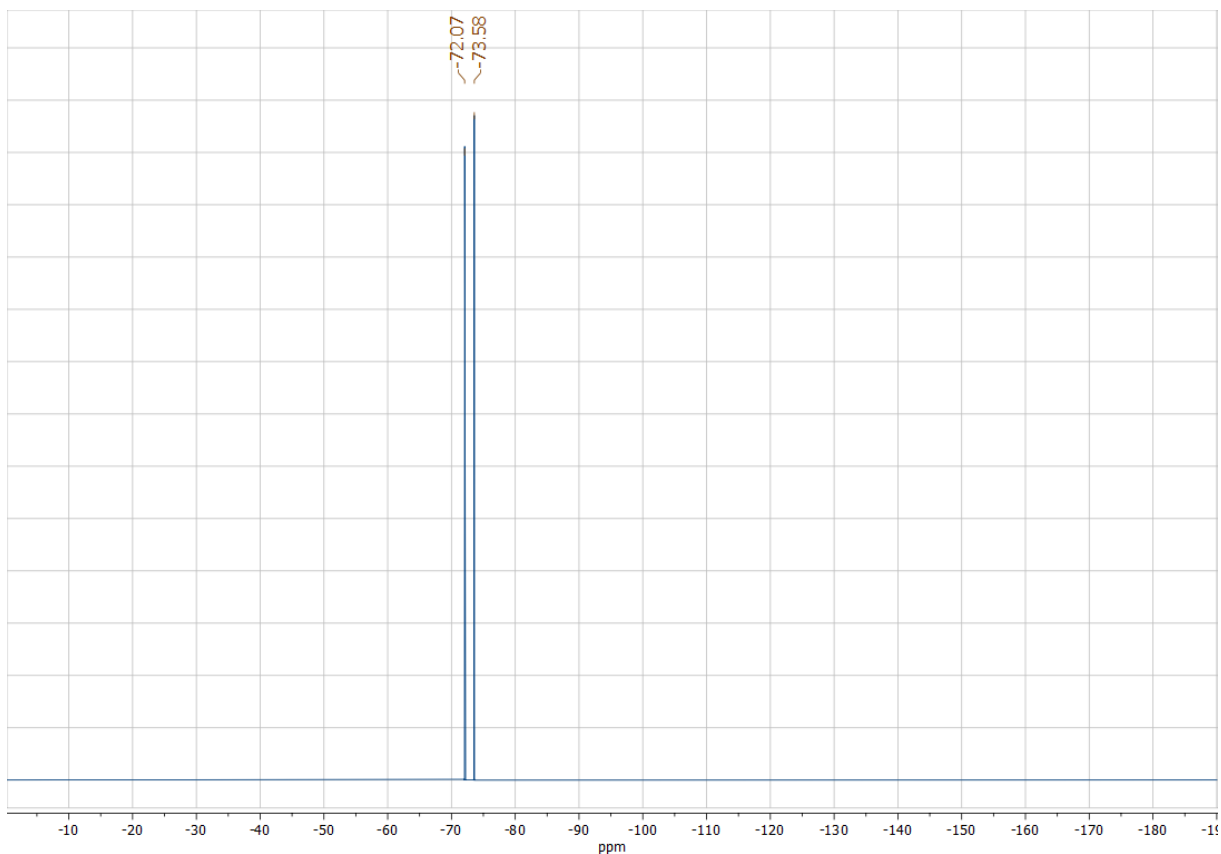

**Figure 37**  $^{19}\text{F}$  NMR spectrum of  $[(\text{dppm})_2\text{CH}]\text{Ag}(\text{NO}_3)](\text{PF}_6)$  (**3-NO<sub>3</sub>**) in  $\text{CD}_2\text{Cl}_2$ .

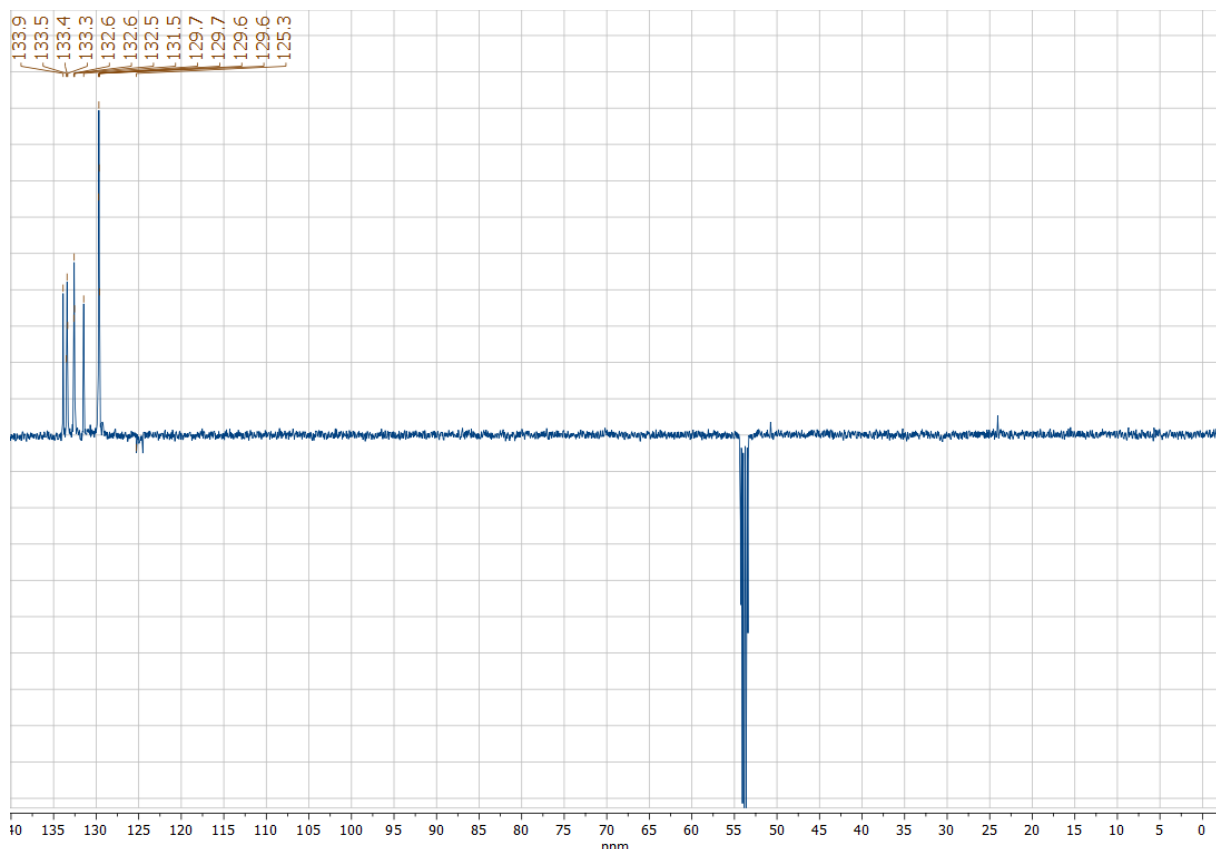

**Figure 38**  $^{13}\text{C}$ -APT NMR spectrum of  $[(\text{dppm})_2\text{CH}]\text{Ag}(\text{NO}_3)](\text{PF}_6)$  (**3-NO<sub>3</sub>**) in  $\text{CD}_2\text{Cl}_2$ .

### 3 X-Ray Crystallography

The single crystal X-ray diffraction data for the structural analysis were collected using graphite-monochromated Mo-K $\alpha$ -radiation ( $\lambda_{\text{MoK}\alpha} = 0.71073$ ) on the pixel detector system Bruker Quest D8 or an imaging plate system STOE IPDS2T. The structures were solved with the Olex2 software by direct methods with SHELXT and refined against  $F^2$  by full-matrix-least-square techniques using SHELXL.<sup>[3–6]</sup> Crystallographic data for **2-X** and **3-X** was deposited at Cambridge Crystallographic Data Centre (CCDC 2172292 - 2172302) and can be obtained free of charge via [www.ccdc.cam.ac.uk/](http://www.ccdc.cam.ac.uk/). Selected Crystallographic data is summarized in Table S1 and S2.

**Table S1.** Crystallographic data of complexes **2-Cl**, **2-Br**, **2-I**, **2-NCMe** and **3**.

| Complex                                   | 2-Cl                                                                                                        | 2-Br                                                                                                  | 2-I                                                              | 2-NCMe                                                            | 3                                                                |
|-------------------------------------------|-------------------------------------------------------------------------------------------------------------|-------------------------------------------------------------------------------------------------------|------------------------------------------------------------------|-------------------------------------------------------------------|------------------------------------------------------------------|
| Formula                                   | C <sub>51</sub> H <sub>45</sub> ClCuP <sub>5</sub> F <sub>6</sub><br>·1.5(CH <sub>2</sub> Cl <sub>2</sub> ) | C <sub>51</sub> H <sub>45</sub> BrCuP <sub>5</sub> F <sub>6</sub><br>·CH <sub>2</sub> Cl <sub>2</sub> | C <sub>51</sub> H <sub>45</sub> CuF <sub>6</sub> IP <sub>5</sub> | C <sub>53</sub> H <sub>48</sub> CuNP <sub>6</sub> F <sub>12</sub> | C <sub>51</sub> H <sub>45</sub> AgF <sub>12</sub> P <sub>6</sub> |
| M / g·mol <sup>-1</sup>                   | 1153.10                                                                                                     | 1155.09                                                                                               | 1117.16                                                          | 1176.28                                                           | 1179.56                                                          |
| T/K                                       | 100                                                                                                         | 170                                                                                                   | 170                                                              | 170                                                               | 170                                                              |
| Crystal System                            | monoclinic                                                                                                  | monoclinic                                                                                            | monoclinic                                                       | monoclinic                                                        | monoclinic                                                       |
| Space Group                               | C2/c                                                                                                        | C2/c                                                                                                  | C2/c                                                             | P2 <sub>1</sub>                                                   | P $\bar{1}$                                                      |
| a / Å                                     | 23.711(1)                                                                                                   | 23.897(2)                                                                                             | 24.032(1)                                                        | 11.749(1)                                                         | 12.3098(7)                                                       |
| b / Å                                     | 11.715(1)                                                                                                   | 11.821(1)                                                                                             | 11.905(1)                                                        | 18.185(1)                                                         | 13.7462(8)                                                       |
| c / Å                                     | 38.189(2)                                                                                                   | 39.320(3)                                                                                             | 39.489(2)                                                        | 13.280(1)                                                         | 16.8265(10)                                                      |
| $\alpha$ / °                              | 90                                                                                                          | 90                                                                                                    | 90                                                               | 90                                                                | 87.104(5)                                                        |
| $\beta$ / °                               | 105.715(1)                                                                                                  | 109.930(6)                                                                                            | 110.076(4)                                                       | 115.779(2)                                                        | 79.167(5)                                                        |
| $\gamma$ / °                              | 90                                                                                                          | 90                                                                                                    | 90                                                               | 90                                                                | 64.063(4)                                                        |
| V / Å <sup>3</sup>                        | 10211.5(8)                                                                                                  | 10442.3(14)                                                                                           | 10611.4(10)                                                      | 2554.97(13)                                                       | 2513.2(3)                                                        |
| Z                                         | 8                                                                                                           | 8                                                                                                     | 8                                                                | 2                                                                 | 2                                                                |
| $\rho_{\text{calc}}$ / g·cm <sup>-3</sup> | 1.500                                                                                                       | 1.469                                                                                                 | 1.399                                                            | 1.529                                                             | 1.559                                                            |
| $\mu$ / mm <sup>-1</sup>                  | 0.853                                                                                                       | 1.496                                                                                                 | 1.197                                                            | 0.698                                                             | 0.673                                                            |
| F(000)                                    | 4712                                                                                                        | 4688                                                                                                  | 4496                                                             | 1200                                                              | 1192                                                             |
| $\theta_{\text{min}}$ / °                 | 2.124                                                                                                       | 2.422                                                                                                 | 2.331                                                            | 2.812                                                             | 1.648                                                            |
| $\theta_{\text{max}}$ / °                 | 26.427                                                                                                      | 26.500                                                                                                | 25.999                                                           | 25.998                                                            | 29.251                                                           |
| Measured Refl.                            | 62444                                                                                                       | 31960                                                                                                 | 41551                                                            | 43743                                                             | 53058                                                            |
| Independent Refl.                         | 10472 (R <sub>int</sub> = 0.0989)                                                                           | 10459 (R <sub>int</sub> = 0.1461)                                                                     | 10434 (R <sub>int</sub> = 0.0792)                                | 9055 (R <sub>int</sub> = 0.0327)                                  | 13478 (R <sub>int</sub> = 0.0582)                                |
| Ind. Refl. ( $I > 2\sigma(I)$ )           | 7472                                                                                                        | 7373                                                                                                  | 8948                                                             | 8471                                                              | 11682                                                            |
| Parameters / Restraints                   | 631/0                                                                                                       | 604/0                                                                                                 | 606 /47                                                          | 651/159                                                           | 664/0                                                            |
| R <sub>1</sub>                            | 0.0491                                                                                                      | 0.0839                                                                                                | 0.0555                                                           | 0.0667                                                            | 0.0345                                                           |
| R <sub>1</sub> (all data)                 | 0.0862                                                                                                      | 0.1211                                                                                                | 0.0625                                                           | 0.0705                                                            | 0.0411                                                           |
| wR <sub>2</sub>                           | 0.0899                                                                                                      | 0.2078                                                                                                | 0.1652                                                           | 0.1803                                                            | 0.0915                                                           |
| wR <sub>2</sub> (all data)                | 0.1004                                                                                                      | 0.2601                                                                                                | 0.1754                                                           | 0.1864                                                            | 0.0958                                                           |
| GooF                                      | 1.038                                                                                                       | 1.157                                                                                                 | 1.041                                                            | 1.091                                                             | 1.040                                                            |
| Flack parameter                           |                                                                                                             |                                                                                                       |                                                                  | 0.006(7)                                                          |                                                                  |
| Max. peak + hole / e·Å <sup>-3</sup>      | 0.651/-0.852                                                                                                | 1.589 / -0.968                                                                                        | 0.707 / -1.077                                                   | 1.082 / -0.909                                                    | 0.751 / -0.795                                                   |
| CCDC                                      | 2172298                                                                                                     | 2172295                                                                                               | 2172293                                                          | 2172294                                                           | 2172299                                                          |

**Table S2.** Crystallographic data of complexes **3-Cl**, **3-Br**, **3-I**, **3-H<sub>2</sub>O**, **3-NCMe**, **3-NO<sub>3</sub>**.

| Complex                                          | 3-Cl                                                                                                                                                    | 3-Br                                                                                                         | 3-I                                                                                                        | 3-H <sub>2</sub> O                                                                                     | 3-NCMe                                                            | 3-OAc                                                                                                                     |
|--------------------------------------------------|---------------------------------------------------------------------------------------------------------------------------------------------------------|--------------------------------------------------------------------------------------------------------------|------------------------------------------------------------------------------------------------------------|--------------------------------------------------------------------------------------------------------|-------------------------------------------------------------------|---------------------------------------------------------------------------------------------------------------------------|
| Formula                                          | C <sub>51</sub> H <sub>45</sub> AgClP <sub>4</sub> ·C <sub>2</sub> H <sub>3</sub><br>O <sub>2</sub> ·CH <sub>2</sub> Cl <sub>2</sub> ·CH <sub>4</sub> O | C <sub>51</sub> H <sub>45</sub> AgBrP <sub>5</sub> F <sub>6</sub><br>·0.75(C <sub>4</sub> H <sub>10</sub> O) | C <sub>51</sub> H <sub>45</sub> AgIP <sub>5</sub> F <sub>6</sub><br>·1.5(CH <sub>2</sub> Cl <sub>2</sub> ) | C <sub>51</sub> H <sub>47</sub> AgOP <sub>6</sub> F <sub>12</sub><br>·C <sub>4</sub> H <sub>10</sub> O | C <sub>53</sub> H <sub>48</sub> AgF <sub>12</sub> NP <sub>6</sub> | C <sub>53</sub> H <sub>48</sub> AgF <sub>6</sub> O <sub>2</sub> P <sub>5</sub> ·0.5<br>(CH <sub>2</sub> Cl <sub>2</sub> ) |
| M / g·mol <sup>-1</sup>                          | 1101.08                                                                                                                                                 | 1170.09                                                                                                      | 1288.88                                                                                                    | 1271.69                                                                                                | 1220.61                                                           | 1136.09                                                                                                                   |
| T/K                                              | 100                                                                                                                                                     | 170                                                                                                          | 170                                                                                                        | 100(2)                                                                                                 | 100(2)                                                            | 100(2)                                                                                                                    |
| Crystal System                                   | monoclinic                                                                                                                                              | monoclinic                                                                                                   | monoclinic                                                                                                 | monoclinic                                                                                             | monoclinic                                                        | monoclinic                                                                                                                |
| Space Group                                      | <i>P</i> 2 <sub>1</sub>                                                                                                                                 | <i>P</i> 2 <sub>1</sub>                                                                                      | <i>C</i> 2/ <i>c</i>                                                                                       | <i>P</i> 2 <sub>1</sub> / <i>c</i>                                                                     | <i>P</i> 2 <sub>1</sub>                                           | <i>P</i> 2 <sub>1</sub>                                                                                                   |
| <i>a</i> / Å                                     | 11.571(2)                                                                                                                                               | 11.695(2)                                                                                                    | 24.0437(14)                                                                                                | 18.913(4)                                                                                              | 11.6318(5)                                                        | 11.818(1)                                                                                                                 |
| <i>b</i> / Å                                     | 18.782(4)                                                                                                                                               | 18.914(4)                                                                                                    | 11.8271(5)                                                                                                 | 14.607(3)                                                                                              | 18.2132(7)                                                        | 18.871(1)                                                                                                                 |
| <i>c</i> / Å                                     | 13.122(3)                                                                                                                                               | 13.280(3)                                                                                                    | 40.075(2)                                                                                                  | 20.359(4)                                                                                              | 13.3823(6)                                                        | 13.321(1)                                                                                                                 |
| $\alpha$ / °                                     | 90                                                                                                                                                      | 90                                                                                                           | 90                                                                                                         | 90                                                                                                     | 90                                                                | 90                                                                                                                        |
| $\beta$ / °                                      | 114.91(3)                                                                                                                                               | 115.34(3)                                                                                                    | 109.918(4)                                                                                                 | 95.42(3)                                                                                               | 115.4520(10)                                                      | 115.01(1)                                                                                                                 |
| $\gamma$ / °                                     | 90                                                                                                                                                      | 90                                                                                                           | 90                                                                                                         | 90                                                                                                     | 90                                                                | 90                                                                                                                        |
| V / Å <sup>3</sup>                               | 2586.4(11)                                                                                                                                              | 2654.9(11)                                                                                                   | 10714.3(10)                                                                                                | 5599(2)                                                                                                | 2559.91(19)                                                       | 2692.2(3)                                                                                                                 |
| Z                                                | 2                                                                                                                                                       | 2                                                                                                            | 8                                                                                                          | 4                                                                                                      | 2                                                                 | 2                                                                                                                         |
| $\rho_{\text{calc}}$ / g·cm <sup>-3</sup>        | 1.414                                                                                                                                                   | 1.464                                                                                                        | 1.493                                                                                                      | 1.509                                                                                                  | 1.584                                                             | 1.401                                                                                                                     |
| $\mu$ / mm <sup>-1</sup>                         | 0.711                                                                                                                                                   | 1.341                                                                                                        | 1.206                                                                                                      | 0.612                                                                                                  | 0.664                                                             | 0.632                                                                                                                     |
| F(000)                                           | 1132                                                                                                                                                    | 1187                                                                                                         | 4808                                                                                                       | 2592                                                                                                   | 1236                                                              | 1158                                                                                                                      |
| $\theta_{\text{min}}$ / °                        | 1.711                                                                                                                                                   | 2.742                                                                                                        | 2.368                                                                                                      | 1.718                                                                                                  | 2.236                                                             | 2.877                                                                                                                     |
| $\theta_{\text{max}}$ / °                        | 26.716                                                                                                                                                  | 29.173                                                                                                       | 29.200                                                                                                     | 26.793                                                                                                 | 27.876                                                            | 26.733                                                                                                                    |
| Measured Refl.                                   | 36829                                                                                                                                                   | 19821                                                                                                        | 47682                                                                                                      | 74348                                                                                                  | 86131                                                             | 23646                                                                                                                     |
| Independent Refl.                                | 10914<br>( <i>R</i> <sub>int</sub> = 0.0877)                                                                                                            | 11400<br>( <i>R</i> <sub>int</sub> = 0.0547)                                                                 | 14163<br>( <i>R</i> <sub>int</sub> = 0.0665)                                                               | 11818<br>( <i>R</i> <sub>int</sub> = 0.0751)                                                           | 11912<br>( <i>R</i> <sub>int</sub> = 0.0393)                      | 10100<br>( <i>R</i> <sub>int</sub> = 0.0641)                                                                              |
| Ind. Refl. ( <i>I</i> > 2 $\sigma$ ( <i>I</i> )) | 9198                                                                                                                                                    | 10115                                                                                                        | 11661                                                                                                      | 7808                                                                                                   | 11283                                                             | 9816                                                                                                                      |
| Parameters /<br>Restraints                       | 599/1                                                                                                                                                   | 627/3                                                                                                        | 624/0                                                                                                      | 759/0                                                                                                  | 659/1                                                             | 620/3                                                                                                                     |
| <i>R</i> <sub>1</sub>                            | 0.0354                                                                                                                                                  | 0.0416                                                                                                       | 0.0432                                                                                                     | 0.0400                                                                                                 | 0.0235                                                            | 0.0472                                                                                                                    |
| <i>R</i> <sub>1</sub> (all data)                 | 0.0430                                                                                                                                                  | 0.0493                                                                                                       | 0.0553                                                                                                     | 0.0621                                                                                                 | 0.0273                                                            | 0.0499                                                                                                                    |
| <i>wR</i> <sub>2</sub>                           | 0.0732                                                                                                                                                  | 0.1085                                                                                                       | 0.1084                                                                                                     | 0.0931                                                                                                 | 0.0507                                                            | 0.1358                                                                                                                    |
| <i>wR</i> <sub>2</sub> (all data)                | 0.0748                                                                                                                                                  | 0.1141                                                                                                       | 0.1183                                                                                                     | 0.0974                                                                                                 | 0.0517                                                            | 0.1337                                                                                                                    |
| GooF                                             | 0.923                                                                                                                                                   | 1.015                                                                                                        | 1.058                                                                                                      | 0.927                                                                                                  | 1.037                                                             | 1.122                                                                                                                     |
| Flack parameter                                  | -0.036(12)                                                                                                                                              | 0.020(10)                                                                                                    |                                                                                                            |                                                                                                        | -0.014(4)                                                         | -0.04(2)                                                                                                                  |
| Max. peak + hole /<br>e·Å <sup>-3</sup>          | 1.083/-0.681                                                                                                                                            | 1.113/-0.622                                                                                                 | 1.074 / -1.465                                                                                             | 0.736/-0.919                                                                                           | 0.577/-0.367                                                      | 1.739/-0.534                                                                                                              |
| CCDC                                             | 2172300                                                                                                                                                 | 2172292                                                                                                      | 2172297                                                                                                    | 2172296                                                                                                | 2172301                                                           | 2172302                                                                                                                   |

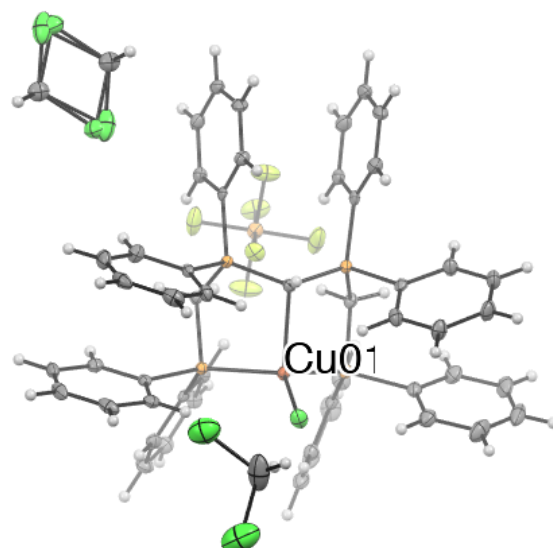

**Figure 39** ORTEP plot of **2-Cl** (thermal ellipsoids are drawn at 50% probability level).

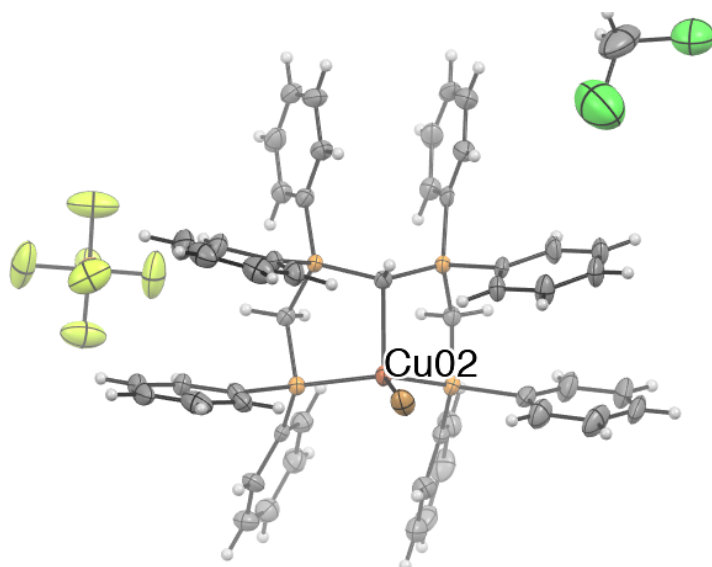

**Figure 40** ORTEP plot of **2-Br** (thermal ellipsoids are drawn at 50% probability level).

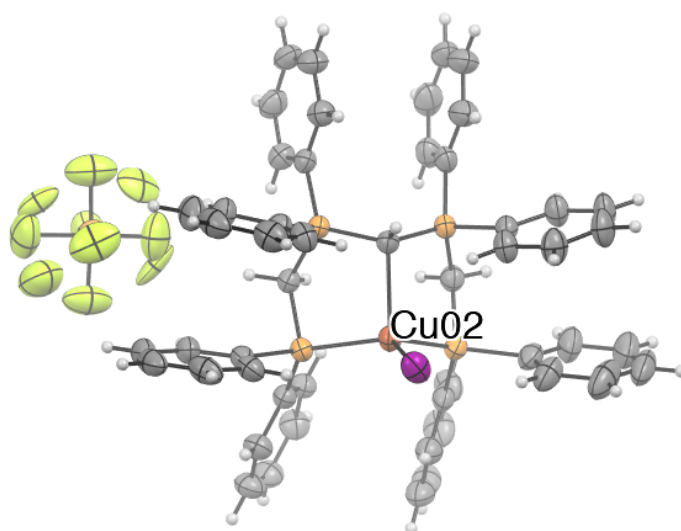

**Figure 41** ORTEP plot of **2-I** (thermal ellipsoids are drawn at 50% probability level).

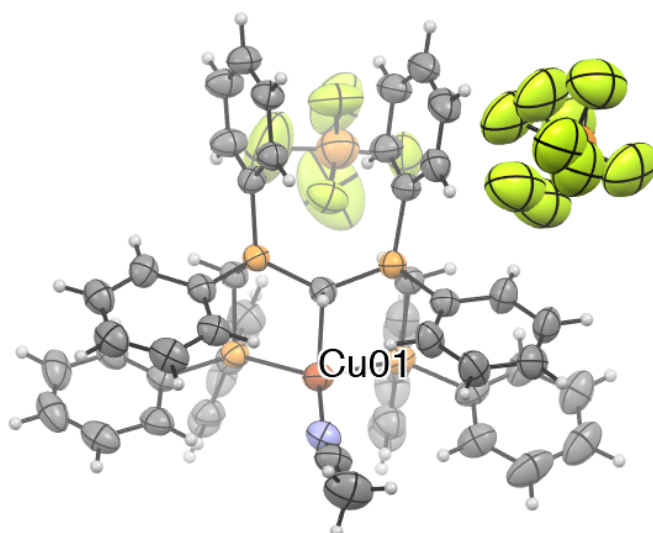

**Figure 42** ORTEP plot of **2-NCMe** (thermal ellipsoids are drawn at 50% probability level).

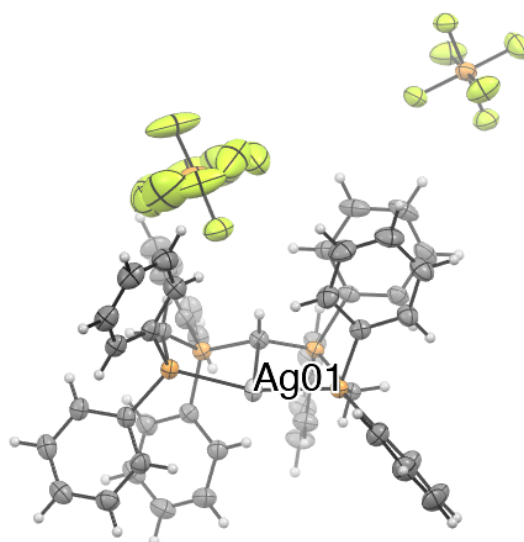

**Figure 43** ORTEP plot of **3** (thermal ellipsoids are drawn at 50% probability level).

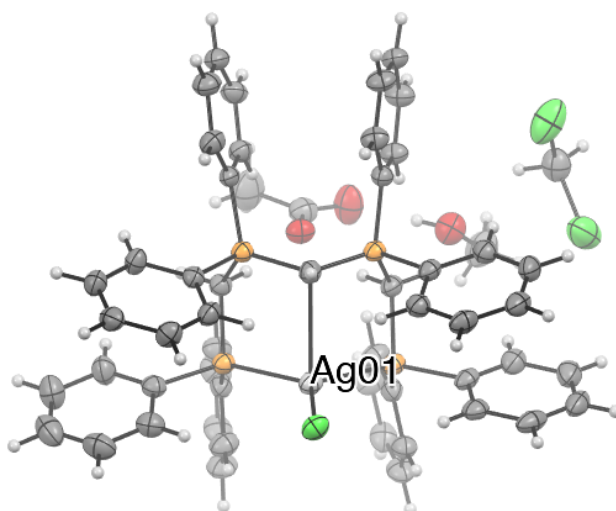

**Figure 44** ORTEP plot of **3-Cl** (thermal ellipsoids are drawn at 50% probability level).

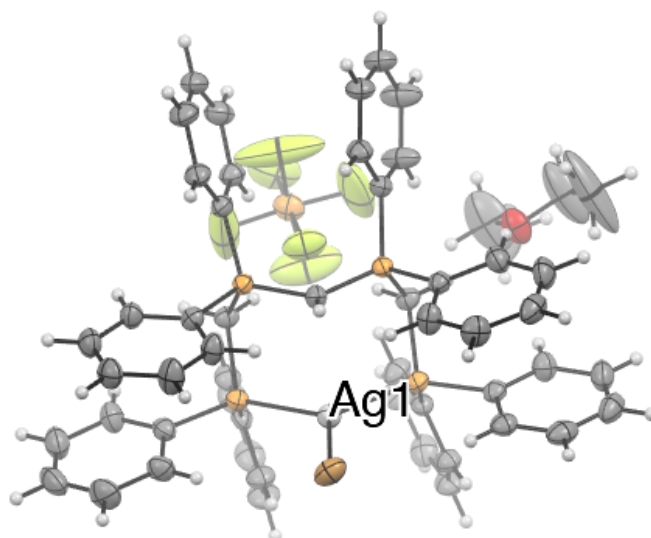

**Figure 45** ORTEP plot of **3-Br** (thermal ellipsoids are drawn at 50% probability level).

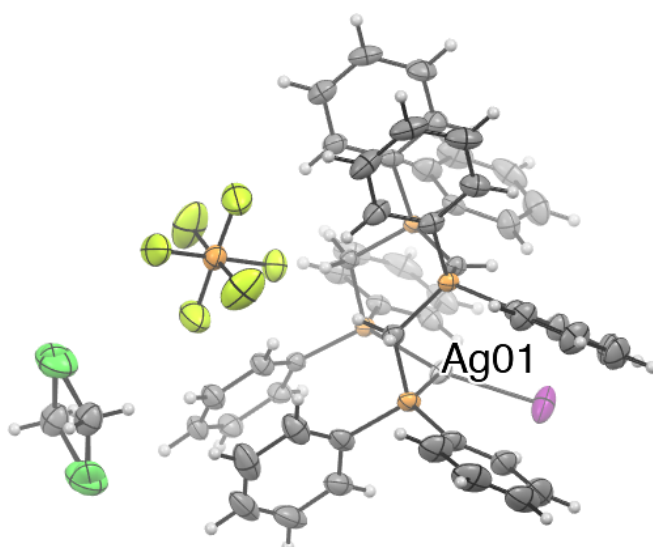

**Figure 46** ORTEP plot of **3-I** (thermal ellipsoids are drawn at 50% probability level).

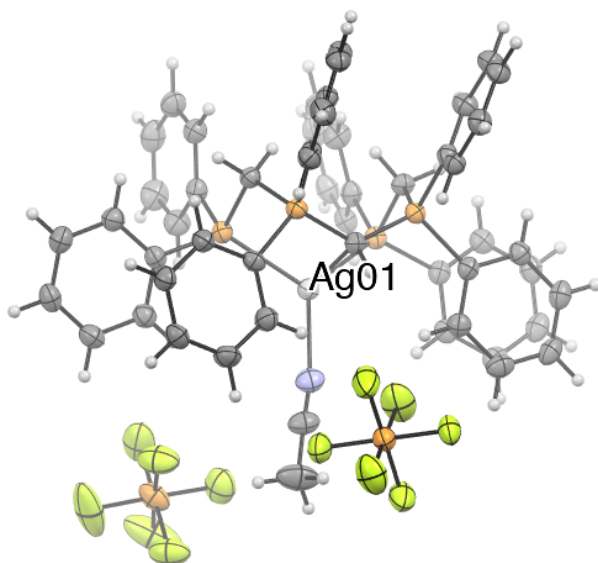

**Figure 47** ORTEP plot of **3-NCMe** (thermal ellipsoids are drawn at 50% probability level).



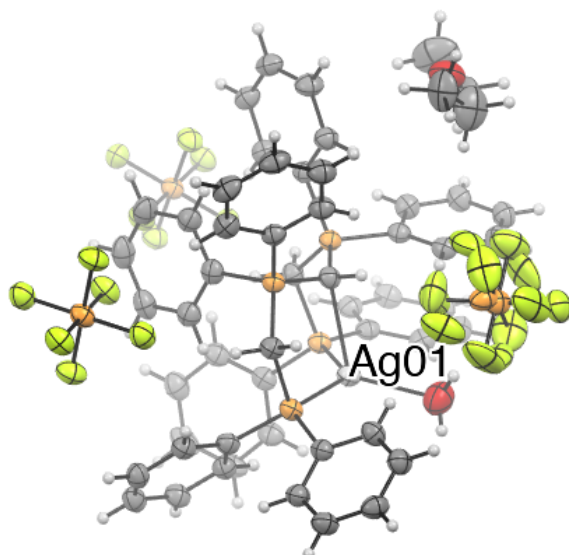

**Figure 48** ORTEP plot of **3-H<sub>2</sub>O** (thermal ellipsoids are drawn at 50% probability level).

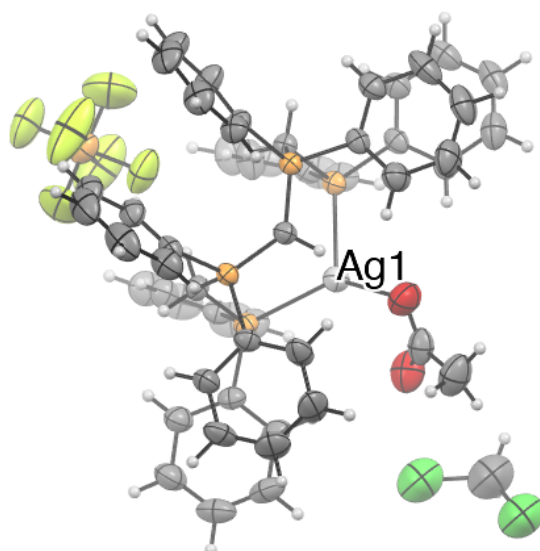

**Figure 49** ORTEP plot of **3-OAc** (thermal ellipsoids are drawn at 50% probability level).

## 4 Computational Details

DFT calculations were performed with Grimme's B97D3 functional including Grimme's D3 dispersion correction<sup>[7]</sup> and the def2-TZVPP basis set after a pre-optimisation with the def2-SVP basis set<sup>[8,9]</sup> in Gaussian16.<sup>[10]</sup> Crystal structures were used as starting models, where possible. After optimization, a frequency calculation was run to ascertain that a ground state was found (no imaginary modes).

All natural bond orbital (NBO) analysis were performed using the NBO 3.0 package.<sup>[11]</sup> Laplacian contour line plots were created with the program Multiwfn.<sup>[12]</sup> Cartesian coordinates of the discussed structure are listed in the following:

### **2-Cl** open form (with hydrogen bridge bond)

|    |          |          |          |
|----|----------|----------|----------|
| Cl | 8.93850  | 8.25970  | 6.25560  |
| Cu | 8.41430  | 9.24420  | 4.31050  |
| P  | 8.28990  | 8.16060  | 2.35660  |
| P  | 7.84360  | 11.42190 | 4.23740  |
| C  | 5.64400  | 8.67250  | 4.71940  |
| C  | 8.98490  | 9.03890  | 0.91580  |
| C  | 8.93180  | 6.46070  | 2.18490  |
| C  | 6.48660  | 8.00050  | 1.93470  |
| C  | 8.50300  | 12.49000 | 2.90440  |
| C  | 8.08630  | 12.39580 | 5.75780  |
| C  | 6.01710  | 11.51480 | 3.88670  |
| P  | 5.50900  | 7.56210  | 3.42830  |
| P  | 5.05440  | 10.27250 | 4.83070  |
| H  | 6.29360  | 8.36620  | 5.53010  |
| C  | 10.24070 | 9.63770  | 1.10100  |
| C  | 8.35950  | 9.13480  | -0.33400 |
| C  | 9.49600  | 5.85370  | 3.31350  |
| C  | 8.89140  | 5.77100  | 0.96480  |
| H  | 6.14480  | 8.98590  | 1.60270  |
| H  | 6.29700  | 7.28060  | 1.13380  |
| C  | 9.48840  | 13.44650 | 3.18670  |
| C  | 8.11060  | 12.29020 | 1.57230  |
| C  | 7.39080  | 13.58260 | 6.02760  |
| C  | 9.03830  | 11.92750 | 6.67380  |
| H  | 5.62100  | 12.51780 | 4.06630  |
| H  | 5.89370  | 11.28580 | 2.82430  |
| C  | 3.81500  | 7.34910  | 2.81630  |
| C  | 6.09380  | 5.94260  | 3.95700  |
| C  | 3.35110  | 10.42690 | 4.24080  |
| C  | 5.10790  | 10.82630 | 6.54470  |
| H  | 10.72080 | 9.58660  | 2.07500  |
| C  | 10.86500 | 10.30530 | 0.05160  |
| C  | 8.98210  | 9.81590  | -1.38110 |
| H  | 7.38880  | 8.67850  | -0.50370 |
| C  | 10.00350 | 4.55730  | 3.22020  |
| H  | 9.52510  | 6.39170  | 4.25740  |

|   |          |          |          |
|---|----------|----------|----------|
| C | 9.39640  | 4.47640  | 0.87980  |
| H | 8.48300  | 6.24880  | 0.07830  |
| H | 9.80630  | 13.61120 | 4.21090  |
| C | 10.05700 | 14.19490 | 2.15550  |
| H | 7.38450  | 11.52470 | 1.31730  |
| C | 8.66870  | 13.04960 | 0.54830  |
| H | 6.66470  | 13.97020 | 5.31910  |
| C | 7.63200  | 14.28160 | 7.20690  |
| H | 9.54970  | 10.98810 | 6.48560  |
| C | 9.29140  | 12.64240 | 7.84440  |
| C | 3.30650  | 8.11850  | 1.76250  |
| C | 2.98190  | 6.42710  | 3.46670  |
| C | 6.58670  | 5.70640  | 5.24450  |
| C | 6.06080  | 4.89930  | 3.01640  |
| C | 2.95610  | 11.36790 | 3.28220  |
| C | 2.39630  | 9.56940  | 4.80910  |
| C | 4.19210  | 11.80200 | 6.96610  |
| C | 6.11070  | 10.37600 | 7.41380  |
| C | 10.23610 | 10.39710 | -1.19150 |
| H | 11.83430 | 10.76850 | 0.20810  |
| H | 8.48960  | 9.88570  | -2.34680 |
| H | 10.43780 | 4.08800  | 4.09790  |
| C | 9.95310  | 3.86850  | 2.00900  |
| H | 9.36760  | 3.94480  | -0.06710 |
| C | 9.64560  | 14.00430 | 0.83640  |
| H | 10.81790 | 14.93420 | 2.38810  |
| H | 8.35240  | 12.88200 | -0.47620 |
| C | 8.58560  | 13.81390 | 8.11540  |
| H | 7.08130  | 15.19400 | 7.41630  |
| H | 10.02990 | 12.27270 | 8.54960  |
| H | 3.93320  | 8.84220  | 1.25200  |
| C | 1.97890  | 7.96870  | 1.36530  |
| C | 1.66020  | 6.27240  | 3.05780  |
| H | 3.37250  | 5.82830  | 4.28370  |
| H | 6.65520  | 6.50240  | 5.97420  |
| C | 7.04300  | 4.43380  | 5.58590  |
| C | 6.51780  | 3.63440  | 3.36500  |
| H | 5.67850  | 5.07340  | 2.01510  |
| H | 3.67820  | 12.04330 | 2.83700  |
| C | 1.61890  | 11.44550 | 2.89080  |
| C | 1.06510  | 9.65390  | 4.41800  |
| H | 2.70740  | 8.83580  | 5.54610  |
| H | 3.41190  | 12.14810 | 6.29500  |
| C | 4.27900  | 12.32120 | 8.25540  |
| H | 6.85150  | 9.64670  | 7.09770  |
| C | 6.18910  | 10.90600 | 8.69970  |
| H | 10.71890 | 10.92610 | -2.00770 |
| H | 10.35240 | 2.86070  | 1.93920  |
| H | 10.08510 | 14.59310 | 0.03690  |

|   |          |          |          |
|---|----------|----------|----------|
| H | 8.77390  | 14.36350 | 9.03310  |
| C | 1.15690  | 7.04340  | 2.00790  |
| H | 1.58840  | 8.57510  | 0.55400  |
| H | 1.02340  | 5.54850  | 3.55730  |
| C | 7.00830  | 3.40030  | 4.65220  |
| H | 7.43850  | 4.26130  | 6.58170  |
| H | 6.50090  | 2.83470  | 2.63160  |
| H | 1.31740  | 12.17600 | 2.14610  |
| C | 0.67480  | 10.59110 | 3.45770  |
| H | 0.33170  | 8.98450  | 4.85610  |
| H | 3.56610  | 13.07190 | 8.58280  |
| C | 5.27890  | 11.87530 | 9.12150  |
| H | 6.97550  | 10.56480 | 9.36520  |
| H | 0.12520  | 6.92270  | 1.69140  |
| H | 7.37150  | 2.41280  | 4.92090  |
| H | -0.36540 | 10.65290 | 3.15230  |
| H | 5.34880  | 12.28510 | 10.12470 |

**2-Cl** closed form (with Cu–C bond)

|    |          |          |          |
|----|----------|----------|----------|
| Cl | 8.99790  | 8.27680  | 6.30640  |
| Cu | 8.27680  | 9.17950  | 4.38140  |
| P  | 8.25400  | 8.16690  | 2.38350  |
| P  | 7.84240  | 11.38870 | 4.22470  |
| C  | 5.69440  | 8.69620  | 4.69950  |
| C  | 8.97080  | 9.08900  | 0.98190  |
| C  | 8.88510  | 6.47010  | 2.14650  |
| C  | 6.45090  | 8.03550  | 1.93720  |
| C  | 8.54610  | 12.43520 | 2.89670  |
| C  | 8.06820  | 12.39200 | 5.72980  |
| C  | 6.02430  | 11.50050 | 3.83800  |
| P  | 5.49930  | 7.55860  | 3.42390  |
| P  | 5.05280  | 10.29080 | 4.79760  |
| H  | 5.82780  | 8.23860  | 5.67180  |
| C  | 10.21470 | 9.69660  | 1.21340  |
| C  | 8.38280  | 9.19360  | -0.28520 |
| C  | 9.52380  | 5.85610  | 3.23040  |
| C  | 8.77970  | 5.79450  | 0.92230  |
| H  | 6.11600  | 9.02790  | 1.61980  |
| H  | 6.24660  | 7.32640  | 1.13060  |
| C  | 9.63130  | 13.27550 | 3.18650  |
| C  | 8.09940  | 12.33820 | 1.57070  |
| C  | 7.39040  | 13.59720 | 5.95840  |
| C  | 8.99250  | 11.92600 | 6.67490  |
| H  | 5.62340  | 12.50500 | 3.99510  |
| H  | 5.90890  | 11.25260 | 2.77930  |
| C  | 3.79810  | 7.30110  | 2.84260  |
| C  | 6.10890  | 5.95490  | 3.96810  |
| C  | 3.34530  | 10.46150 | 4.21180  |

|   |          |          |          |
|---|----------|----------|----------|
| C | 5.10080  | 10.82110 | 6.51620  |
| H | 10.66300 | 9.63970  | 2.20200  |
| C | 10.86540 | 10.37980 | 0.19040  |
| C | 9.03210  | 9.88970  | -1.30540 |
| H | 7.42170  | 8.73070  | -0.48930 |
| C | 10.04090 | 4.56750  | 3.09010  |
| H | 9.60320  | 6.38440  | 4.17690  |
| C | 9.29260  | 4.50720  | 0.79020  |
| H | 8.31460  | 6.27760  | 0.06720  |
| H | 9.99210  | 13.36150 | 4.20650  |
| C | 10.24280 | 14.01160 | 2.17210  |
| H | 7.29310  | 11.66300 | 1.30260  |
| C | 8.70200  | 13.08690 | 0.56350  |
| H | 6.68850  | 13.98370 | 5.22480  |
| C | 7.61940  | 14.31690 | 7.12780  |
| H | 9.48910  | 10.97260 | 6.51730  |
| C | 9.23520  | 12.66250 | 7.83450  |
| C | 3.26590  | 8.03890  | 1.77710  |
| C | 2.97410  | 6.40930  | 3.54590  |
| C | 6.75880  | 5.78020  | 5.19500  |
| C | 5.95730  | 4.86810  | 3.09050  |
| C | 2.95960  | 11.37170 | 3.22000  |
| C | 2.38350  | 9.62100  | 4.79400  |
| C | 4.18690  | 11.79350 | 6.95020  |
| C | 6.10260  | 10.35410 | 7.37900  |
| C | 10.27530 | 10.47780 | -1.07080 |
| H | 11.82440 | 10.85100 | 0.38220  |
| H | 8.56930  | 9.96620  | -2.28530 |
| H | 10.53370 | 4.09300  | 3.93350  |
| C | 9.92400  | 3.89260  | 1.87580  |
| H | 9.21180  | 3.98640  | -0.15960 |
| C | 9.77640  | 13.92630 | 0.86020  |
| H | 11.07990 | 14.66060 | 2.41240  |
| H | 8.34110  | 13.00060 | -0.45650 |
| C | 8.54540  | 13.85180 | 8.06580  |
| H | 7.08260  | 15.24430 | 7.30550  |
| H | 9.95290  | 12.29540 | 8.56220  |
| H | 3.88390  | 8.74060  | 1.22660  |
| C | 1.92860  | 7.88270  | 1.41690  |
| C | 1.64190  | 6.24920  | 3.17540  |
| H | 3.38030  | 5.83550  | 4.37350  |
| H | 6.96330  | 6.61790  | 5.85140  |
| C | 7.23340  | 4.51800  | 5.54810  |
| C | 6.44650  | 3.61680  | 3.44640  |
| H | 5.45790  | 4.99890  | 2.13500  |
| H | 3.68610  | 12.03300 | 2.76090  |
| C | 1.62550  | 11.43940 | 2.81510  |
| C | 1.05560  | 9.69640  | 4.39140  |
| H | 2.68360  | 8.90680  | 5.55500  |

|   |          |          |          |
|---|----------|----------|----------|
| H | 3.40900  | 12.15180 | 6.28300  |
| C | 4.27500  | 12.29350 | 8.24660  |
| H | 6.84430  | 9.63160  | 7.04830  |
| C | 6.17840  | 10.86270 | 8.67370  |
| H | 10.77900 | 11.01870 | -1.86630 |
| H | 10.32920 | 2.89040  | 1.76930  |
| H | 10.24880 | 14.50660 | 0.07340  |
| H | 8.72540  | 14.41820 | 8.97500  |
| C | 1.11720  | 6.98540  | 2.11090  |
| H | 1.52190  | 8.46210  | 0.59390  |
| H | 1.01340  | 5.54750  | 3.71560  |
| C | 7.07790  | 3.43910  | 4.68030  |
| H | 7.74810  | 4.39320  | 6.49550  |
| H | 6.33960  | 2.78210  | 2.76100  |
| H | 1.33180  | 12.14750 | 2.04610  |
| C | 0.67470  | 10.60520 | 3.40020  |
| H | 0.31760  | 9.04130  | 4.84310  |
| H | 3.56590  | 13.04330 | 8.58390  |
| C | 5.27160  | 11.82960 | 9.10770  |
| H | 6.96280  | 10.50860 | 9.33480  |
| H | 0.07760  | 6.85980  | 1.82360  |
| H | 7.46040  | 2.46070  | 4.95520  |
| H | -0.36290 | 10.65960 | 3.08460  |
| H | 5.34160  | 12.22470 | 10.11680 |

**3-Cl** open form (with hydrogen bridge bond)

|    |          |          |          |
|----|----------|----------|----------|
| Ag | -0.01680 | -1.51230 | -1.10110 |
| P  | 2.03530  | -1.50870 | 0.15900  |
| P  | -2.14440 | -1.46150 | 0.06990  |
| Cl | -0.09620 | -0.82490 | -3.48040 |
| C  | -0.02670 | 1.53420  | -0.51740 |
| C  | 3.61520  | -1.59060 | -0.74520 |
| C  | 2.10580  | 0.10280  | 1.09270  |
| C  | 2.18280  | -2.75390 | 1.48830  |
| C  | -2.11370 | 0.07460  | 1.13920  |
| C  | -3.64420 | -1.32230 | -0.94580 |
| C  | -2.48360 | -2.72540 | 1.34960  |
| P  | -1.52550 | 1.62120  | 0.30970  |
| P  | 1.57260  | 1.56850  | 0.09170  |
| H  | -0.11150 | 1.21770  | -1.55320 |
| C  | 3.57260  | -1.54910 | -2.14610 |
| C  | 4.84540  | -1.71220 | -0.07900 |
| H  | 1.40540  | 0.01600  | 1.93260  |
| H  | 3.10630  | 0.29180  | 1.50060  |
| C  | 2.54850  | -2.46170 | 2.81110  |
| C  | 1.88160  | -4.08180 | 1.13800  |
| H  | -3.09970 | 0.26670  | 1.58050  |
| H  | -1.41740 | -0.15640 | 1.95510  |

|   |          |          |          |
|---|----------|----------|----------|
| C | -4.85510 | -0.79360 | -0.47030 |
| C | -3.55550 | -1.77670 | -2.27080 |
| C | -3.71610 | -3.38470 | 1.46730  |
| C | -1.43320 | -3.06270 | 2.22080  |
| C | -1.50680 | 2.87290  | 1.62180  |
| C | -2.82390 | 2.05080  | -0.87240 |
| C | 2.74830  | 1.68680  | -1.27390 |
| C | 1.89710  | 2.97290  | 1.20150  |
| H | 2.61680  | -1.45750 | -2.65950 |
| C | 4.76310  | -1.61650 | -2.87440 |
| H | 4.87530  | -1.77420 | 1.00680  |
| C | 6.02930  | -1.77930 | -0.81290 |
| C | 2.60950  | -3.48010 | 3.76780  |
| H | 2.79090  | -1.44400 | 3.10510  |
| C | 1.95790  | -5.09770 | 2.08980  |
| H | 1.57560  | -4.31680 | 0.12040  |
| C | -5.96490 | -0.72280 | -1.31110 |
| H | -4.93570 | -0.43470 | 0.55260  |
| H | -2.60440 | -2.13430 | -2.65900 |
| C | -4.67460 | -1.71860 | -3.10460 |
| H | -4.52870 | -3.14630 | 0.78760  |
| C | -3.89610 | -4.35790 | 2.45510  |
| H | -0.45730 | -2.59610 | 2.10800  |
| C | -1.62180 | -4.02420 | 3.21320  |
| C | -1.15920 | 4.18350  | 1.25380  |
| C | -1.84890 | 2.59050  | 2.95180  |
| C | -2.77660 | 1.55390  | -2.18430 |
| C | -3.91660 | 2.82080  | -0.44410 |
| C | 2.35160  | 1.69200  | -2.61710 |
| C | 4.11270  | 1.76490  | -0.94200 |
| C | 1.77560  | 2.86410  | 2.59380  |
| C | 2.23840  | 4.20780  | 0.62720  |
| C | 5.98740  | -1.73130 | -2.21180 |
| H | 4.72940  | -1.58300 | -3.96010 |
| H | 6.98170  | -1.88050 | -0.29830 |
| C | 2.31840  | -4.79830 | 3.40830  |
| H | 2.89250  | -3.24270 | 4.79030  |
| H | 1.72340  | -6.12020 | 1.80620  |
| C | -5.87670 | -1.19150 | -2.62720 |
| H | -6.89750 | -0.30410 | -0.94190 |
| H | -4.59870 | -2.06980 | -4.13020 |
| C | -2.85540 | -4.67420 | 3.33230  |
| H | -4.85220 | -4.86880 | 2.53650  |
| H | -0.79950 | -4.27740 | 3.87690  |
| H | -0.88890 | 4.40090  | 0.22450  |
| C | -1.15460 | 5.19670  | 2.20900  |
| H | -2.12790 | 1.58520  | 3.25120  |
| C | -1.83740 | 3.61030  | 3.90750  |
| C | -3.82390 | 1.83730  | -3.06090 |

|   |          |          |          |
|---|----------|----------|----------|
| H | -1.95300 | 0.93360  | -2.53070 |
| H | -3.95120 | 3.21050  | 0.56980  |
| C | -4.95630 | 3.10110  | -1.33180 |
| H | 1.31100  | 1.59530  | -2.90140 |
| C | 3.31940  | 1.77910  | -3.62060 |
| C | 5.07000  | 1.85220  | -1.94830 |
| H | 4.42870  | 1.76310  | 0.09800  |
| H | 1.50850  | 1.91770  | 3.05430  |
| C | 1.99110  | 3.98050  | 3.40410  |
| C | 2.46380  | 5.31740  | 1.44110  |
| H | 2.33890  | 4.29500  | -0.45140 |
| H | 6.91080  | -1.79130 | -2.78260 |
| H | 2.37010  | -5.58940 | 4.15190  |
| H | -6.74430 | -1.13680 | -3.28000 |
| H | -3.00050 | -5.43170 | 4.09820  |
| C | -1.49290 | 4.91150  | 3.53660  |
| H | -0.88280 | 6.20780  | 1.92000  |
| H | -2.10310 | 3.38670  | 4.93720  |
| H | -3.78790 | 1.44430  | -4.07270 |
| C | -4.91010 | 2.60920  | -2.63930 |
| H | -5.79760 | 3.70530  | -1.00280 |
| C | 4.67250  | 1.86230  | -3.29010 |
| H | 3.00620  | 1.76820  | -4.66060 |
| H | 6.12310  | 1.90540  | -1.68760 |
| H | 1.88830  | 3.89150  | 4.48200  |
| C | 2.33990  | 5.20510  | 2.82980  |
| H | 2.74040  | 6.26760  | 0.99210  |
| H | -1.48790 | 5.70430  | 4.28000  |
| H | -5.72120 | 2.82710  | -3.32920 |
| H | 5.42110  | 1.92660  | -4.07550 |
| H | 2.51690  | 6.07070  | 3.46290  |

**3-Cl** closed form (with Cu–C bond)

|    |          |          |          |
|----|----------|----------|----------|
| Ag | -0.05900 | -1.08410 | -1.35280 |
| P  | 1.83920  | -1.57940 | 0.09680  |
| P  | -2.07300 | -1.29400 | 0.05830  |
| Cl | -0.22040 | -0.54560 | -3.74130 |
| C  | 0.12100  | 1.46080  | -0.52620 |
| C  | 3.53720  | -1.81720 | -0.53000 |
| C  | 1.97820  | -0.05970 | 1.16660  |
| C  | 1.60490  | -2.91320 | 1.31930  |
| C  | -1.94810 | 0.19420  | 1.16880  |
| C  | -3.72250 | -1.12240 | -0.69680 |
| C  | -2.29380 | -2.65110 | 1.26350  |
| P  | -1.37930 | 1.69040  | 0.28730  |
| P  | 1.69600  | 1.44720  | 0.16790  |
| H  | 0.11230  | 1.85870  | -1.53410 |
| C  | 3.71120  | -1.88050 | -1.91770 |



|   |          |          |          |
|---|----------|----------|----------|
| C | 4.64480  | -1.95800 | 0.31820  |
| H | 1.19450  | -0.11930 | 1.92790  |
| H | 2.94400  | 0.02230  | 1.67180  |
| C | 2.03860  | -2.85150 | 2.65070  |
| C | 0.97810  | -4.08020 | 0.85600  |
| H | -2.90080 | 0.40170  | 1.66310  |
| H | -1.20210 | -0.02180 | 1.93860  |
| C | -4.89030 | -1.04920 | 0.07800  |
| C | -3.80790 | -1.08650 | -2.09370 |
| C | -2.96850 | -3.80310 | 0.82620  |
| C | -1.73500 | -2.64280 | 2.54850  |
| C | -1.37240 | 2.99920  | 1.54620  |
| C | -2.62560 | 2.12960  | -0.93530 |
| C | 2.91930  | 1.45820  | -1.15230 |
| C | 2.09150  | 2.83660  | 1.26670  |
| H | 2.85140  | -1.76910 | -2.57280 |
| C | 4.98610  | -2.07010 | -2.45140 |
| H | 4.51630  | -1.94120 | 1.39700  |
| C | 5.91570  | -2.14270 | -0.21920 |
| C | 1.85920  | -3.94390 | 3.49920  |
| H | 2.52420  | -1.95880 | 3.03370  |
| C | 0.81150  | -5.17300 | 1.70190  |
| H | 0.61400  | -4.12250 | -0.16720 |
| C | -6.13040 | -0.92760 | -0.54110 |
| H | -4.83090 | -1.10780 | 1.16180  |
| H | -2.90180 | -1.13600 | -2.69310 |
| C | -5.05540 | -0.96960 | -2.70890 |
| H | -3.40380 | -3.82950 | -0.16850 |
| C | -3.09840 | -4.90680 | 1.66570  |
| H | -1.17850 | -1.78480 | 2.91100  |
| C | -1.87290 | -3.74680 | 3.38810  |
| C | -0.96500 | 4.27610  | 1.12930  |
| C | -1.73200 | 2.79110  | 2.88350  |
| C | -2.42360 | 1.91150  | -2.30400 |
| C | -3.84340 | 2.65430  | -0.47440 |
| C | 2.56300  | 1.30640  | -2.49760 |
| C | 4.27260  | 1.56400  | -0.78830 |
| C | 1.86910  | 2.76550  | 2.64810  |
| C | 2.52780  | 4.04250  | 0.69720  |
| C | 6.08700  | -2.19820 | -1.60570 |
| H | 5.11600  | -2.11480 | -3.52850 |
| H | 6.77170  | -2.25410 | 0.44030  |
| C | 1.25280  | -5.10720 | 3.02400  |
| H | 2.19920  | -3.88830 | 4.52940  |
| H | 0.32060  | -6.06850 | 1.33430  |
| C | -6.21290 | -0.88800 | -1.93680 |
| H | -7.03340 | -0.87230 | 0.06010  |
| H | -5.11730 | -0.93980 | -3.79250 |
| C | -2.55720 | -4.88030 | 2.95230  |

|   |          |          |          |
|---|----------|----------|----------|
| H | -3.63010 | -5.78660 | 1.31520  |
| H | -1.43560 | -3.72120 | 4.38130  |
| H | -0.67490 | 4.43710  | 0.09510  |
| C | -0.92420 | 5.32720  | 2.03730  |
| H | -2.05090 | 1.81340  | 3.22760  |
| C | -1.68640 | 3.84950  | 3.79240  |
| C | -3.43460 | 2.23950  | -3.20510 |
| H | -1.52320 | 1.43560  | -2.68160 |
| H | -4.00040 | 2.82830  | 0.58640  |
| C | -4.85020 | 2.96440  | -1.38310 |
| H | 1.53450  | 1.14320  | -2.80280 |
| C | 3.55910  | 1.28430  | -3.47300 |
| C | 5.25760  | 1.52860  | -1.76830 |
| H | 4.55430  | 1.67590  | 0.25460  |
| H | 1.52140  | 1.84520  | 3.10610  |
| C | 2.08670  | 3.88450  | 3.45010  |
| C | 2.75380  | 5.15400  | 1.50430  |
| H | 2.69910  | 4.10500  | -0.37310 |
| H | 7.07870  | -2.34750 | -2.02280 |
| H | 1.11430  | -5.95660 | 3.68610  |
| H | -7.18230 | -0.79790 | -2.41850 |
| H | -2.66390 | -5.73940 | 3.60770  |
| C | -1.28460 | 5.11550  | 3.37100  |
| H | -0.60460 | 6.31110  | 1.70860  |
| H | -1.96830 | 3.68220  | 4.82760  |
| H | -3.27510 | 2.05810  | -4.26340 |
| C | -4.64340 | 2.76400  | -2.75010 |
| H | -5.79310 | 3.36660  | -1.02560 |
| C | 4.90050  | 1.39710  | -3.11310 |
| H | 3.27410  | 1.15470  | -4.51230 |
| H | 6.30260  | 1.59920  | -1.48380 |
| H | 1.90650  | 3.82370  | 4.51880  |
| C | 2.53350  | 5.07690  | 2.88110  |
| H | 3.10400  | 6.08030  | 1.05890  |
| H | -1.24970 | 5.93790  | 4.07920  |
| H | -5.43000 | 3.00970  | -3.45740 |
| H | 5.67250  | 1.36930  | -3.87630 |
| H | 2.70880  | 5.94530  | 3.50890  |

## 5 References

- [1] K. Sommer, *Zeitschrift für Anorg. und Allg. Chemie* **1970**, *376*, 37–43.
- [2] C. Reitsamer, S. Stallinger, W. Schuh, H. Kopacka, K. Wurst, D. Obendorf, P. Peringer, *Dalt. Trans.* **2012**, *41*, 3503–3514.
- [3] O. V. Dolomanov, L. J. Bourhis, R. J. Gildea, J. A. K. Howard, H. Puschmann, *J. Appl. Crystallogr.* **2009**, *42*, 339–341.
- [4] L. J. Bourhis, O. V. Dolomanov, R. J. Gildea, J. A. K. Howard, H. Puschmann, *Acta Crystallogr. Sect. A Found. Crystallogr.* **2015**, *71*, 59–75.
- [5] G. M. Sheldrick, *Acta Crystallogr. Sect. A Found. Crystallogr.* **2008**, *64*, 112–122.
- [6] G. M. Sheldrick, *Acta Crystallogr. Sect. A Found. Crystallogr.* **2015**, *71*, 3–8.
- [7] S. Grimme, *J. Comput. Chem.* **2006**, *27*, 1787–1799.
- [8] F. Weigend, R. Ahlrichs, K. A. Peterson, T. H. Dunning, R. M. Pitzer, A. Bergner, *Phys. Chem. Chem. Phys.* **2005**, *7*, 3297.
- [9] F. Weigend, C. Hättig, H. Patzelt, R. Ahlrichs, S. Spencer, A. Willems, *Phys. Chem. Chem. Phys.* **2006**, *8*, 1057.
- [10] M. J. Frisch, G. W. Trucks, H. B. Schlegel, G. E. Scuseria, M. A. Robb, J. R. Cheeseman, G. Scalmani, V. Barone, G. A. Petersson, H. Nakatsuji, et al., **2016**.
- [11] A. E. Reed, J. E. Carpenter, F. Weinhold, *NBO, Version 3.0*, **n.d.**
- [12] T. Lu, F. Chen, *J. Comput. Chem.* **2012**, *33*, 580–592.
